# Supplementary material for: Design of allosteric modulators that change GPCR G protein subtype selectivity
Source: PubMed Central journal article supplement — bioRxiv. 2024 Nov 21:2024.11.20.624209. Preprint. [Version 2] doi: 10.1101/2024.11.20.624209 (PMC11601581; doi:10.1101/2024.11.20.624209), 2024-11-21
Supplement: media-1.pdf [file media-1.pdf]

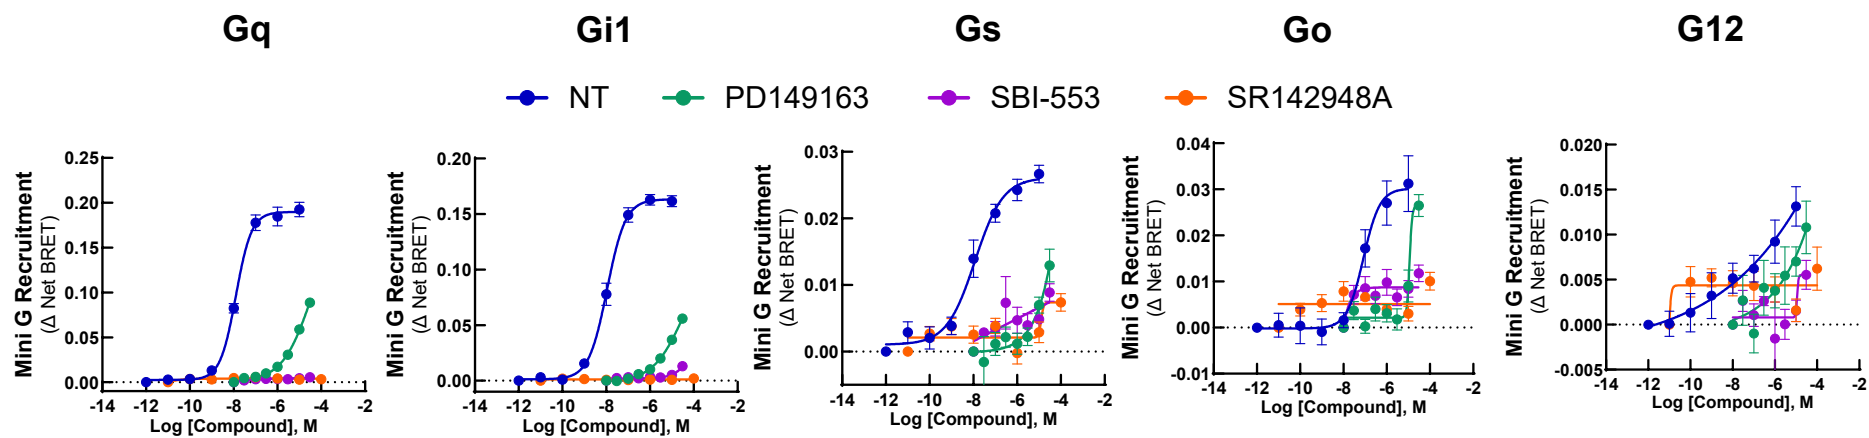

**Supplemental Figure 1. Ligand-induced mini G protein recruitment to the NTSR1.** In HEK293T cells transiently expressing NTSR1 and mini Gq, Gi1, Gs, Go, or G12, activation was assessed following treatment with the endogenous agonist NT, the modified NT peptide analogue PD149163, the  $\beta$ -arrestin-biased ligand SBI-553, and the orthosteric antagonist SR142948A. N=3.

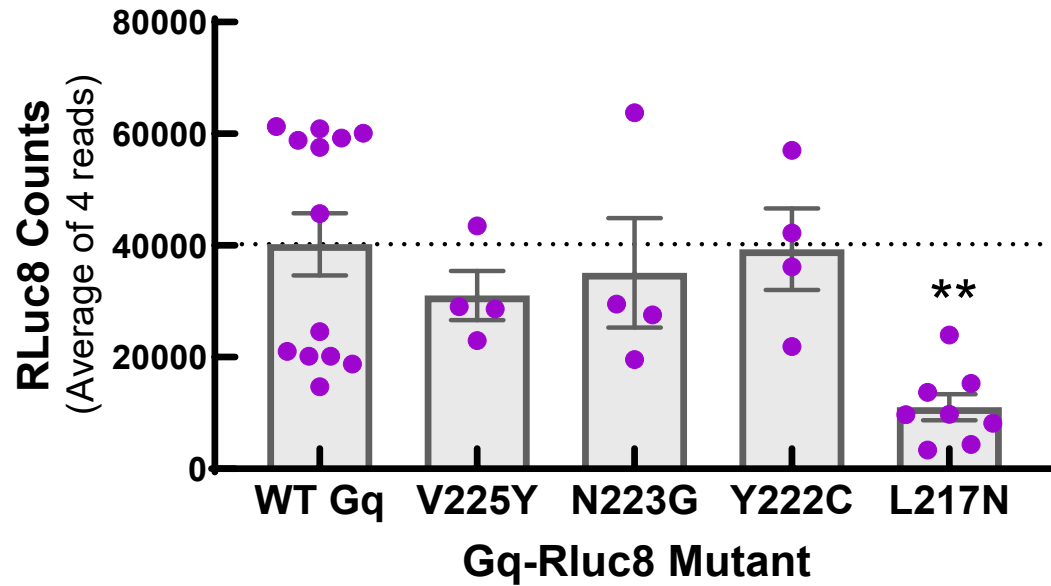

**Supplemental Figure 2. Relative expression of Gq-Rluc8 mutants as determined by total Rluc8 counts.** Rluc8 emission from experiments presented in Figure 4 M. Rluc8 counts per plate were averaged over 4 reads. One-way ANOVA followed by Tukey's multiple comparisons test.  $F(4, 28) = 4.533$ ,  $p=0.0060$ . \*\* $p<0.001$  L217N vs. WT Gq. N = 4-13.

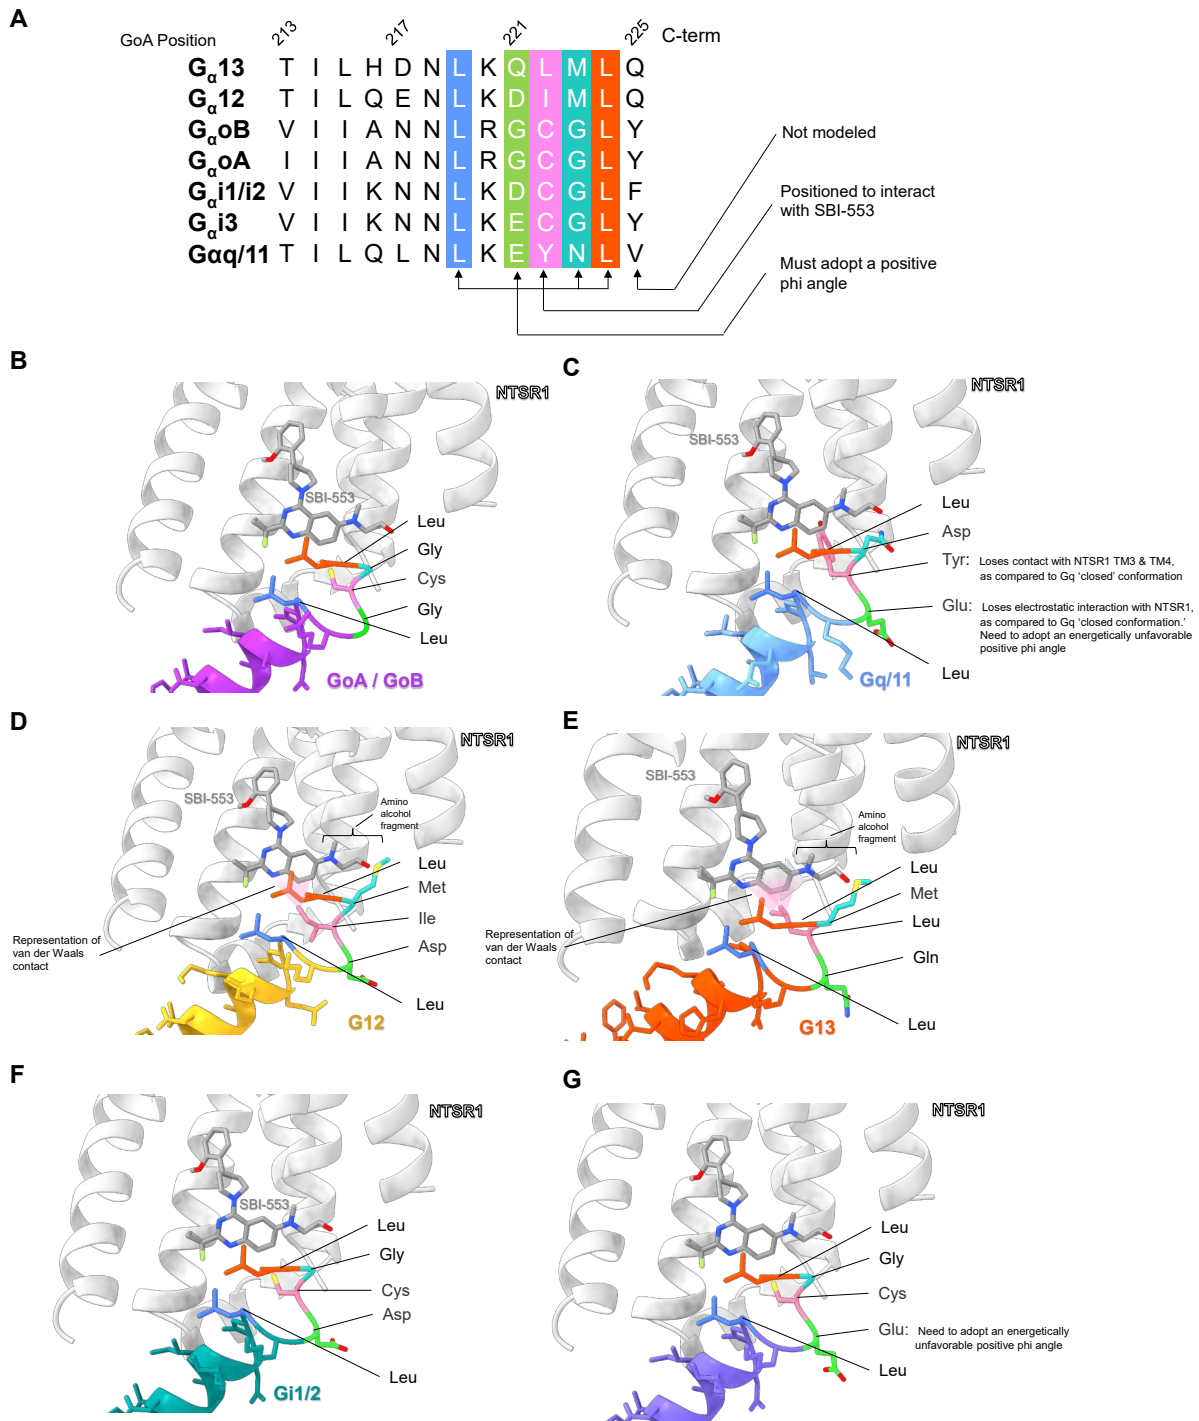

**Supplemental Figure 3. NTSR1:SBI-553:G $\alpha$  homology models provide a rational basis for SBI-553's observed G protein/ $\beta$ -arrestin selectivity. (A)** G protein C-terminal alignments with residues positioned to interact with SBI-553 and determine stability of the NTSR1 interaction colored. Residues in proximity to SBI-553 (i.e., 219, 222, 223, 224), residues that adopt alternative L positions relative to the 'closed' conformation, and residues that interact with NTSR1 are all predicted to have an impact on G protein selectivity. Other residues may also play a role but are difficult to predict with our current models. **(B)** We propose that GoB behaves similarly to GoA because their C-termini are identical until V213, which is not positioned to interact with either NTSR1 nor SBI-553 in the NTSR1:SBI-553:GoA open position model. **(C)** Three structural differences may increase the energy of this conformation for Gq, relative to GoA and relative to the 'closed' NTSR1:Gq conformation: (1) E242 of Gq (G221 in GoA) makes a dipolar interaction with the backbone NH of Q98 of NTSR1 in the 'closed' conformation that would be absent in the 'open' position, (2) forcing E242 to adopt a positive phi angle, while allowed, is energetically less favorable compared to G221, and (3) in the 'closed' conformation,

Y243 of Gq (C222 in GoA) extends between TM3 and TM4 and has a large contact energy, which would be absent in the 'open' conformation. Within their 13 C-terminal amino acids, **(D)** G12 and **(E)** G13 have 9 polymorphic differences with GoA. Of these, only 223 and 222 are positioned to interact with SBI-553. The final C-terminal residue at position 225 differs between G12/13 and GoA but is unresolved in our reference GoA structure PDB 8FN0 and difficult to incorporate in the model. Notably, PDB 8FMZ (Gq) indicates that it turns away from the SBI-553 binding pocket. The six remaining amino acid changes in G12 and G13 point away from NTRS1 in the open conformation. For both G12 and G13, M223 must adopt a slightly higher energy conformation with gauche interactions, but these are compensated by close contact with the SBI-553 amino alcohol fragment. G12's I222 and G13's L222 both make productive van der Waals contact with SBI-553. The G12 and G13 models predict that this complex is energetically favorable, consistent with the observed activation of these G proteins by SBI-553. **(F)** Gi1 differs from GoA at four residues, none of which, however, are expected to make contact with SBI-553. **(G)** Gi3 has a sequence intermediate to GoA and Gq. Unlike Gq, Gi3 lacks the tyrosine at 222. As a result, relative to Gq, the models predict that Gi3 will more easily adopt the open conformation.

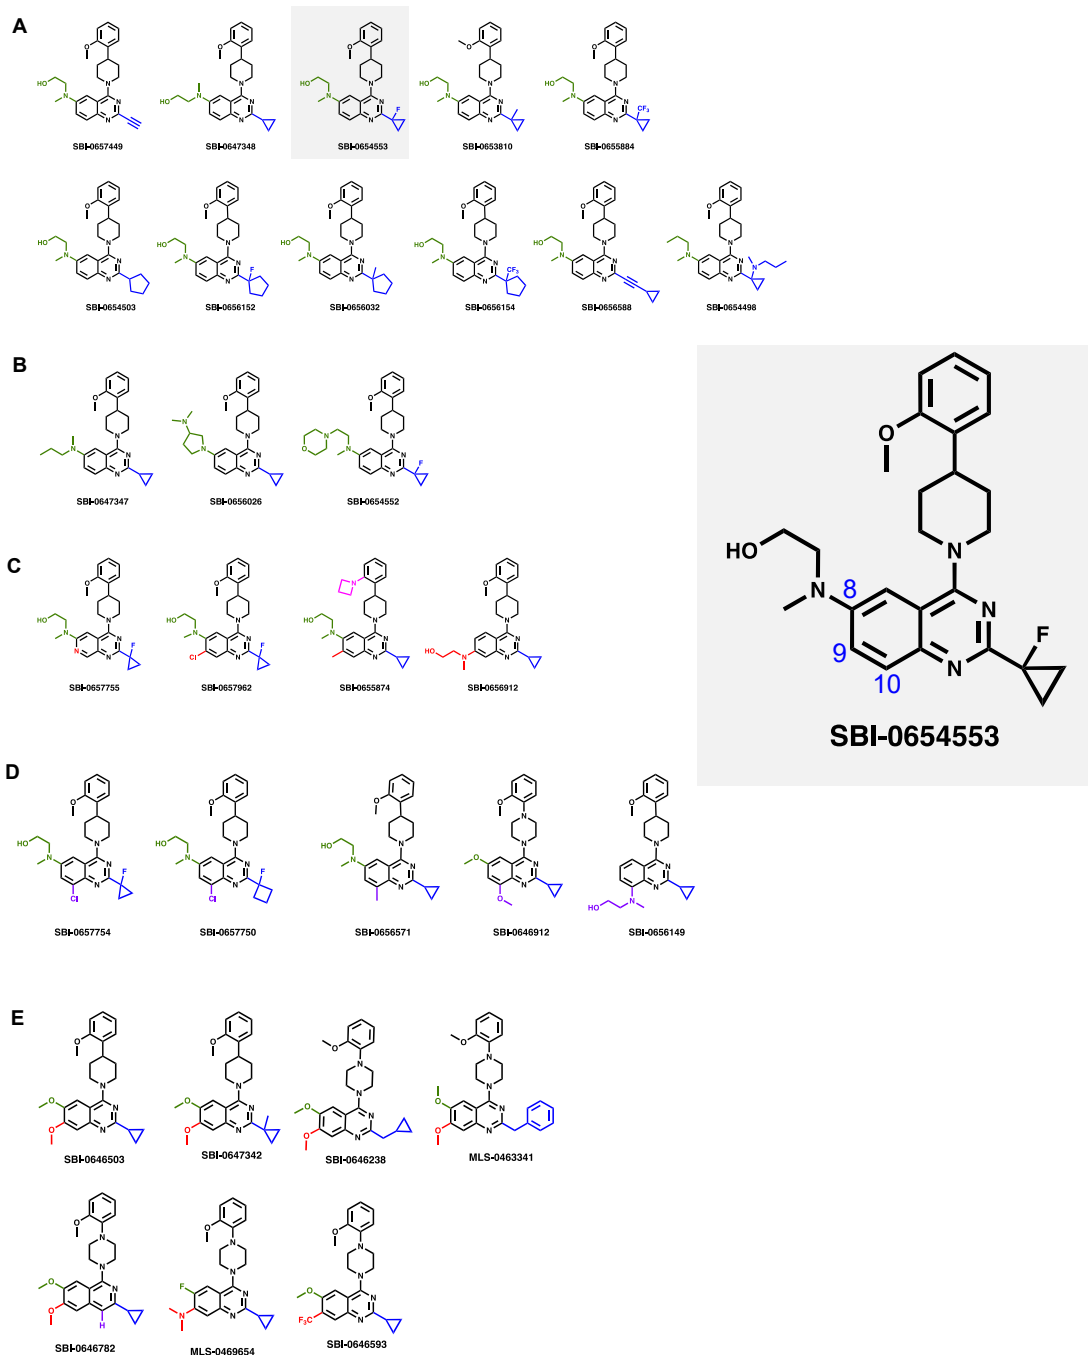

**Supplemental Figure 4. Structures of SBI-553 analogues screened. (A)** Changes to the cyclopropane (blue). Sorted left to right from small to large. **(B)** Changes to the quinazoline 8-position (green). Sorted left to right from small to large. Groups also have different rigidity / basicity / polarity. Note SBI-348 is the best comparator for compounds '347 and '026 and SBI-553 is the best comparator for compound '552. **(C)** Changes to the quinazoline 9-position (red). Sorted left to right from small to large. **(D)** Changes to the quinazoline 10-position (purple). Sorted left to right from small to large. **(E)** Dimethoxy (early hit) compounds and related compounds.

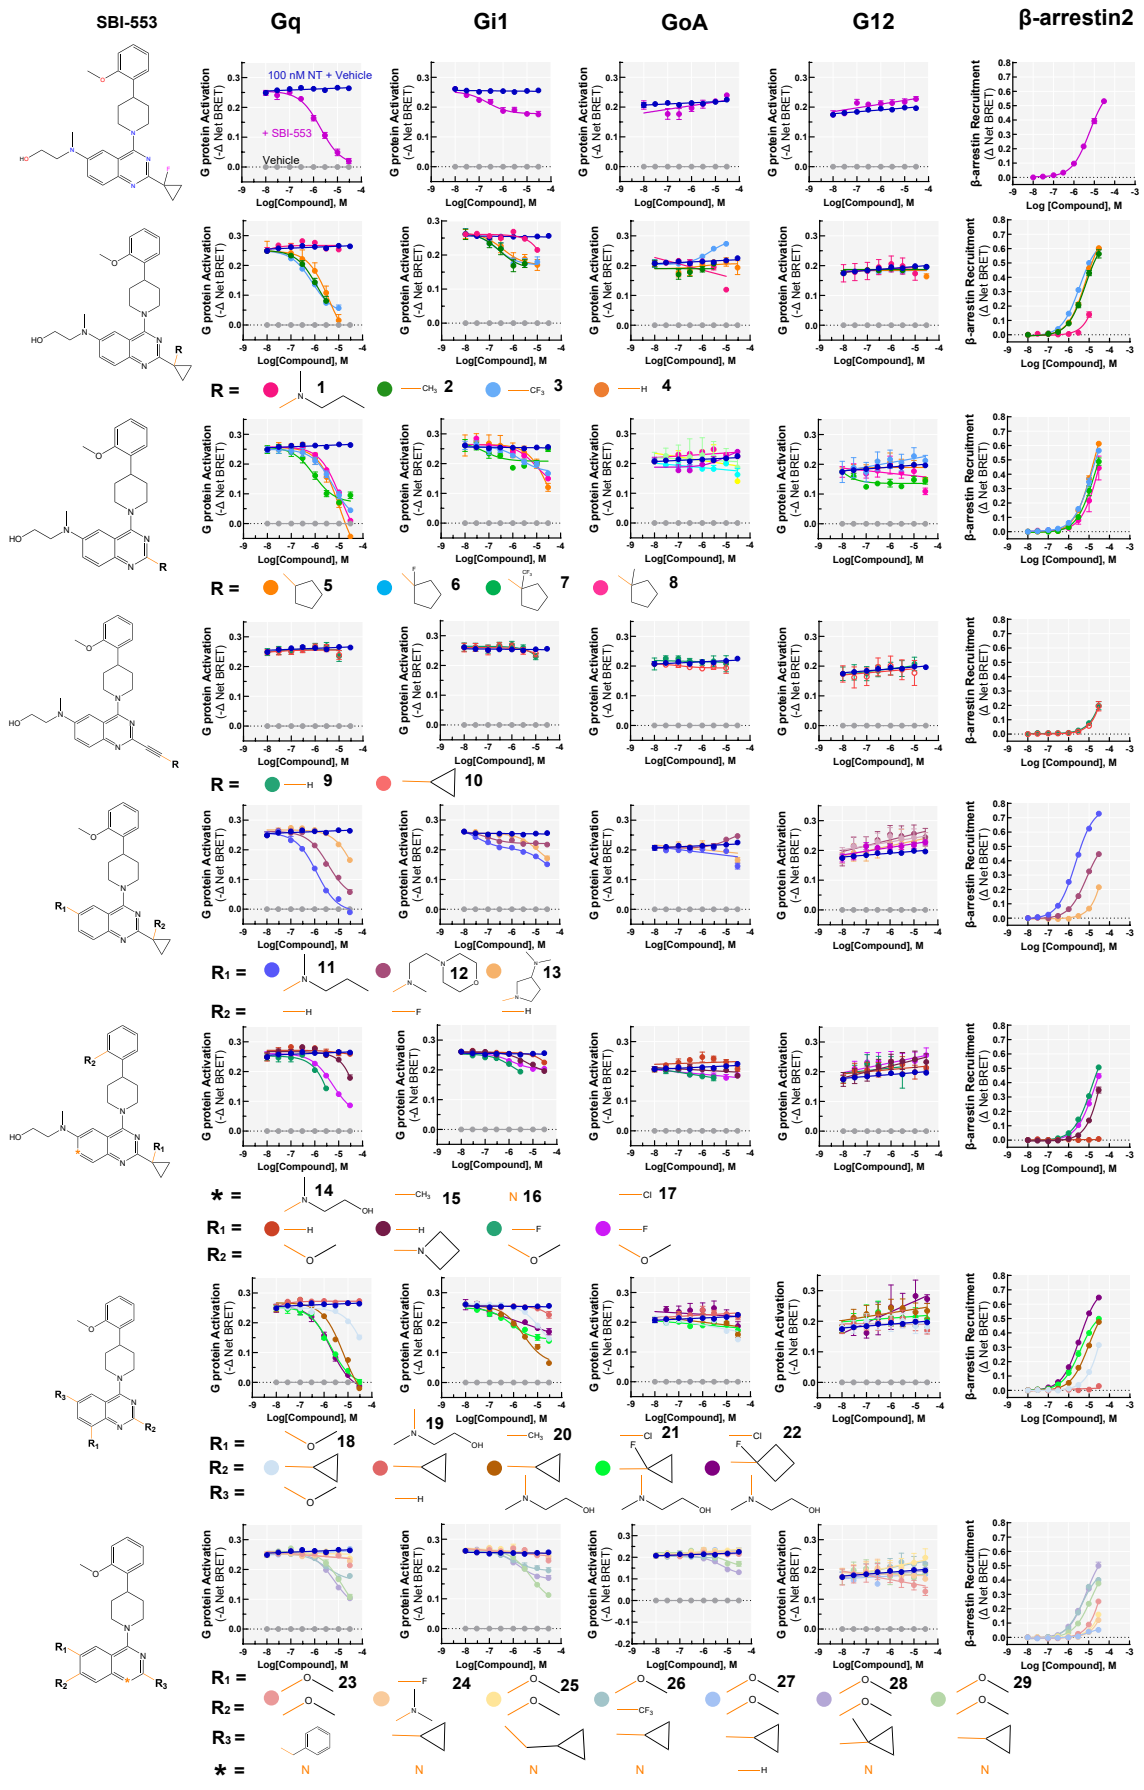

| #  | SBP ID      |
|----|-------------|
| 1  | SBI-0654498 |
| 2  | SBI-0653810 |
| 3  | SBI-0655884 |
| 4  | SBI-0647348 |
| 5  | SBI-0654503 |
| 6  | SBI-0656152 |
| 7  | SBI-0656154 |
| 8  | SBI-0656032 |
| 9  | SBI-0657449 |
| 10 | SBI-0656588 |
| 11 | SBI-0647347 |
| 12 | SBI-0654552 |
| 13 | SBI-0656026 |
| 14 | SBI-0656912 |
| 15 | SBI-0655874 |
| 16 | SBI-0657755 |
| 17 | SBI-0657962 |
| 18 | SBI-0646912 |
| 19 | SBI-0656149 |
| 20 | SBI-0656571 |
| 21 | SBI-0657754 |
| 22 | SBI-0657750 |
| 23 | MLS-0463341 |
| 24 | MLS-0469654 |
| 25 | SBI-0646238 |
| 26 | SBI-0646593 |
| 27 | SBI-0646782 |
| 28 | SBI-0647342 |
| 29 | SBI-0646503 |

**Supplemental Figure 5. Screen of SBI-553 derivatives in assessments of Gq, Gi1, Go, and G12 antagonism and  $\beta$ -arrestin agonism.** In HEK293T cells transiently expressing NTSR1, SBI-553, and 29 selected analogues (300 nM - 30  $\mu$ M) were assessed for their ability to antagonize 100 nM NT-induced G protein activation by TRUPATH and stimulate  $\beta$ -arrestin2 recruitment independently by BRET. A table associating SBP compound ID numbers with screen IDs (1-29) is provided at right. Structures on the right of each row reflect the structural base for all compounds in that row. Some compounds selected for follow-up analyses produced non-NTSR1 mediated effects on G protein sensor activity. Concentrations producing these effects have been removed. Vehicle, 3%  $\beta$ -HB-cyclodextrin, <0.25% DMSO in HBSS. N = 3.

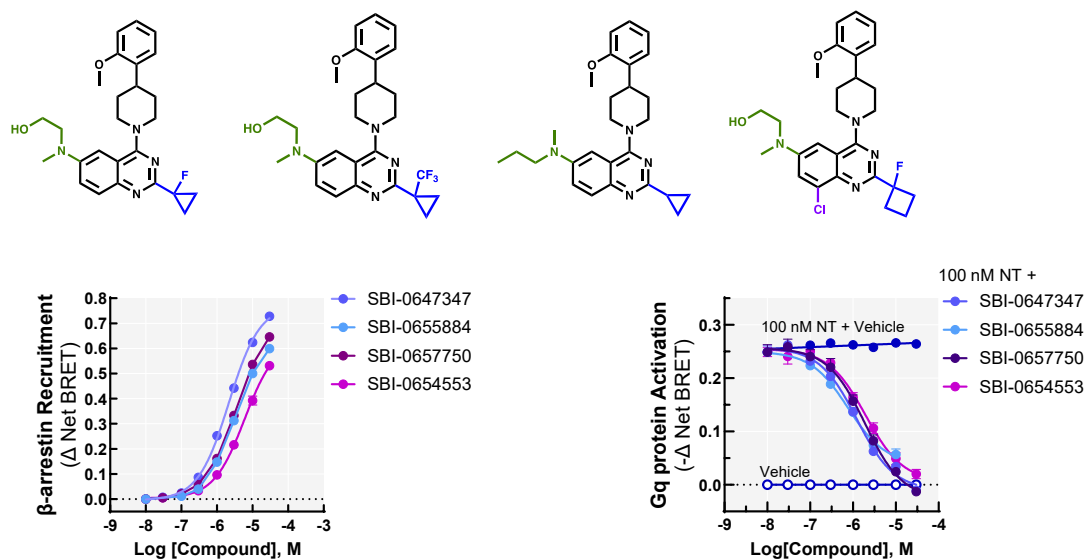

**D**

| SBP ID      | Screen ID | $\beta$ -arrestin2 EC <sub>50</sub> ( $\mu$ M) | $\beta$ -arrestin2 E <sub>max</sub> ( $\Delta$ BRET) | Gq IC <sub>50</sub> ( $\mu$ M) | Gq Bottom ( $\Delta$ BRET) |
|-------------|-----------|------------------------------------------------|------------------------------------------------------|--------------------------------|----------------------------|
| SBI-0654553 | -         | 6.0 (5.0-7.2)                                  | 0.63 (0.60-0.68)                                     | 1.9 (1.4-2.8)                  | 0.01 (-0.01-0.02)          |
| SBI-0655884 | 3         | 3.4 (3.0-3.7)*                                 | 0.67 (0.65-0.69)                                     | 0.76 (0.50-1.2)*               | 0.04 (0.02-0.06)           |
| SBI-0647347 | 11        | 2.2 (2.0-2.4)*                                 | 0.77 (0.78-0.79)*                                    | 3.7 (2.5-5.5)                  | 0.03 (0.01-0.06)           |
| SBI-0657750 | 22        | 2.2 (1.9-2.4)*                                 | 0.77 (0.75-0.79)*                                    | 1.9 (1.3-2.8)                  | -0.02 (-0.05-0.00)         |

Data presented as mean (95% confidence interval). Asterisks (\*) indicate confidence intervals that do not overlap with that of SBI-553.

**Supplemental Figure 6. SBI-553 analogues with increased  $\beta$ -arrestin2 agonist potency. (A)** Structures of SBI-553 and analogues with increased  $\beta$ -arrestin2 agonist potency. **(B)** Concentration-response curves for SBI-553 and selected analogues in a BRET-based assay of human  $\beta$ -arrestin2 recruitment to the human NTSR1. In HEK293T cells transiently expressing NTSR1, SBI-553, and analogues (300 nM - 30  $\mu$ M) were assessed for their ability to stimulate  $\beta$ -arrestin2 recruitment independently by BRET. **(C)** Concentration-response curves for SBI-553 and selected analogues in a BRET-based assay of antagonism of NT-induced Gq activation. In HEK293T cells transiently expressing NTSR1, SBI-553, and analogues (300 nM - 30  $\mu$ M) were assessed for their ability to NT-induced Gq activation by TRUPATH. **(D)** Table summarizing SBI compound agonist potency and efficacy at  $\beta$ -arrestin2 and antagonist potency and efficacy at Gq. Data are presented as mean (95% confidence interval). Asterisks (\*) indicate confidence intervals that do not overlap with that of SBI-553. Note that changes in potency in  $\beta$ -arrestin do not always translate to changes in potency in Gq antagonism, suggesting that these properties can vary independently. SBI compounds were prepared in 3%  $\beta$ -HB-cyclodextrin, <0.25% DMSO in HBSS. NT vehicle, HBSS. N=3.



**A**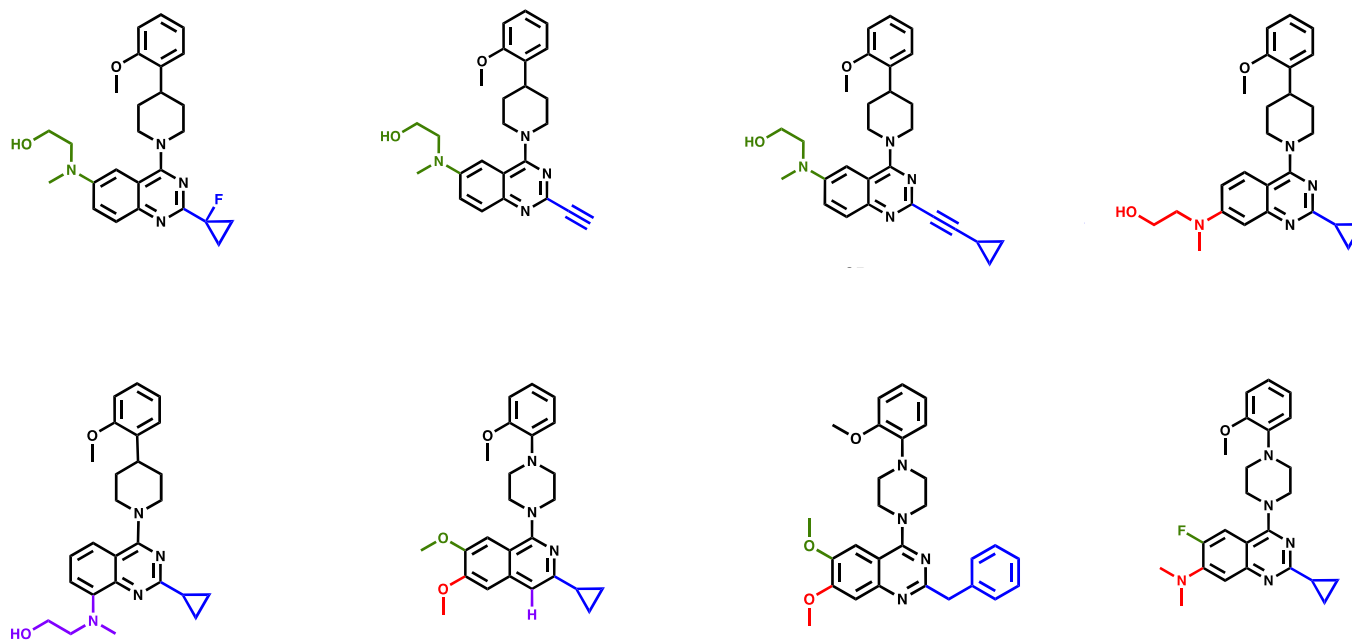**B**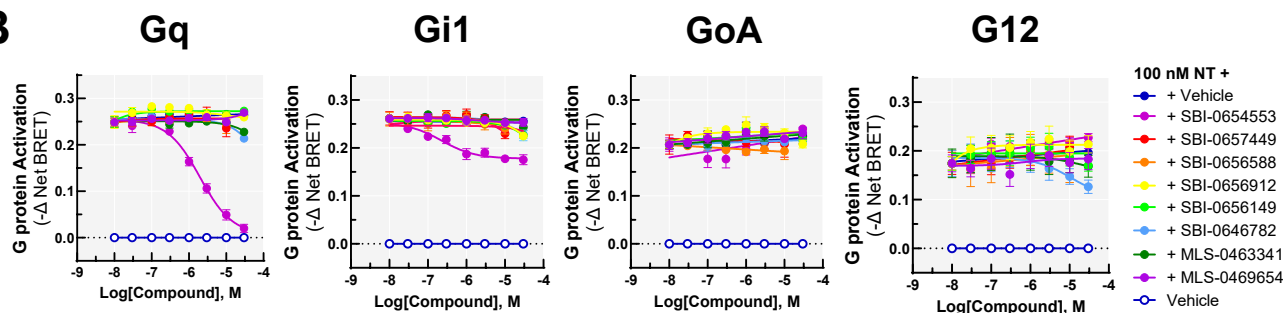**C**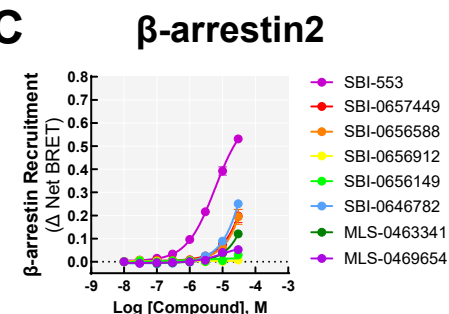

**Supplemental Figure 7. Compounds with little to no activity in functional assays.** These compounds may be silent allosteric ligands or may not bind NTSR1. **(A)** Structures of SBI-553 and analogues without activity in the evaluated assays. **(B)** Concentration-response curves for SBI-553 and analogues that lack activity in the evaluated concentration range in assessments of antagonism of NT-induced Gq activation by TRUPATH and  $\beta$ -arrestin agonism by BRET. In HEK293T cells transiently expressing NTSR1, SBI-553, and 29 selected analogues (300 nM - 30  $\mu$ M) were assessed for their ability to antagonize 100 nM NT-induced Gq protein activation and **(C)** to promote agonism of  $\beta$ -arrestin2 independently. SBI compounds were prepared in 3%  $\beta$ -HB-cyclodextrin, <0.25% DMSO in HBSS. N = 3.

**A****SBI-0653810**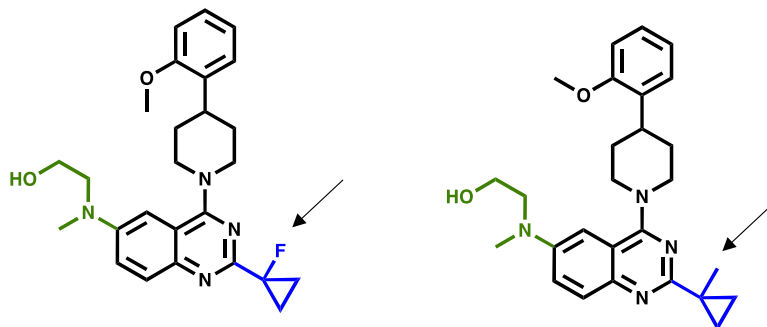**B**

○ Vehicle   ● 100 nM NT + Vehicle   ● 100 nM NT + SBI-553   ● 100 nM NT + SBI-810

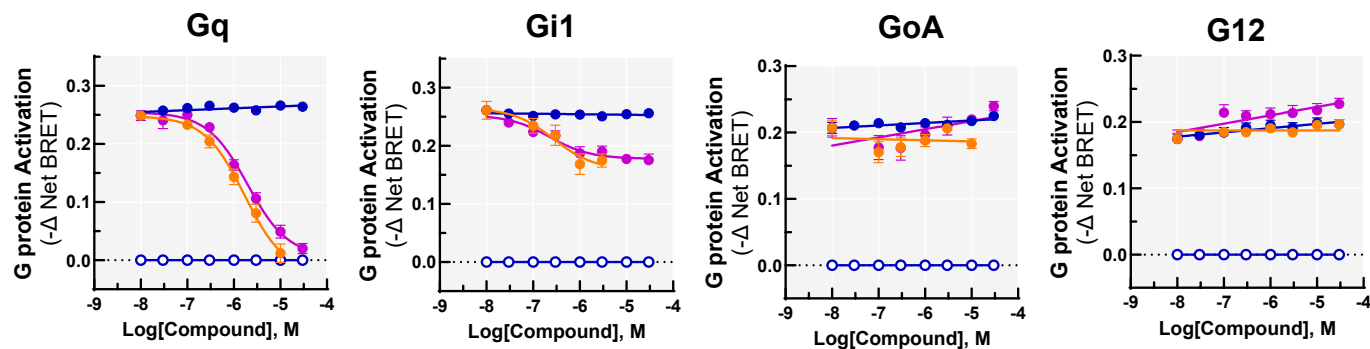**C**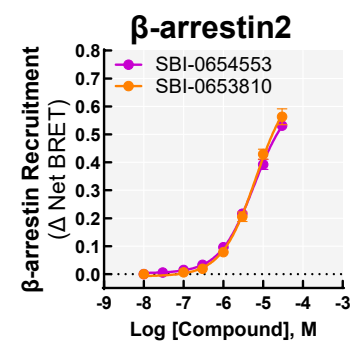**D**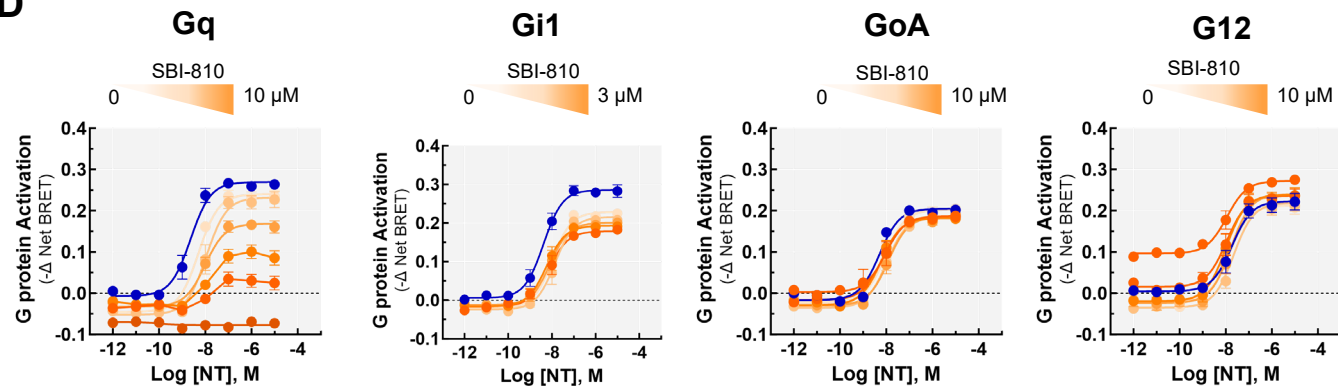**E**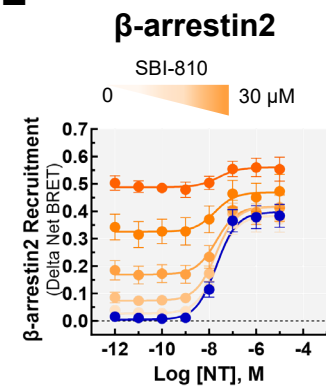

**Supplemental Figure 8. Substitution of SBI-553's fluorine for a methyl group does not reduce NT-induced Go activation. (A)** Structural comparison of SBI-553, SBI-810, and SBI-342. Arrows indicate the methyl substituent that differs between SBI-553 and both SBI-810 and SBI-342. **(B)** In HEK293T cells transiently expressing NTSR1, SBI-810 and SBI-553 were assessed for their ability to antagonize NT-induced G protein activation using the bioluminescence resonance energy transfer 2-based TRUPATH assay. SBI-810 produced non-NTSR1-dependent changes in some G protein sensors at high (i.e., 10 or 30  $\mu$ M) concentrations. SBI-810 concentrations producing nonspecific effects on G protein sensors are not presented. SBI-553 and SBI-810 are comparable in these assays. **(C)** SBI-810 and SBI-553-induced recruitment of human  $\beta$ -arrestin2 to the human NTSR1 was assessed in HEK293T cells by BRET. Compounds are equally potent and efficacious in this assay. **(D)** G protein activation by the NTSR1 induced by co-treatment with NT and vehicle or 0.03, 0.3, 1, 3, or 10  $\mu$ M SBI-810. The effect of SBI-810 on NT-induced G protein activation is similar to that of SBI-553, as presented in main text Figure 5. As the doses evaluated, unlike SBI-553, SBI-810 did not stimulate GoA activation in the absence of NT. **(E)**  $\beta$ -arrestin2 recruitment to NTSR1 induced by co-treatment with NT and vehicle or 0.03, 0.3, 1, 3, or 30  $\mu$ M SBI-810. SBI-810 acted as a full  $\beta$ -arrestin2 agonist and permitted NT-induced  $\beta$ -arrestin2 recruitment. HEK293T cells, N=3-5.

**A**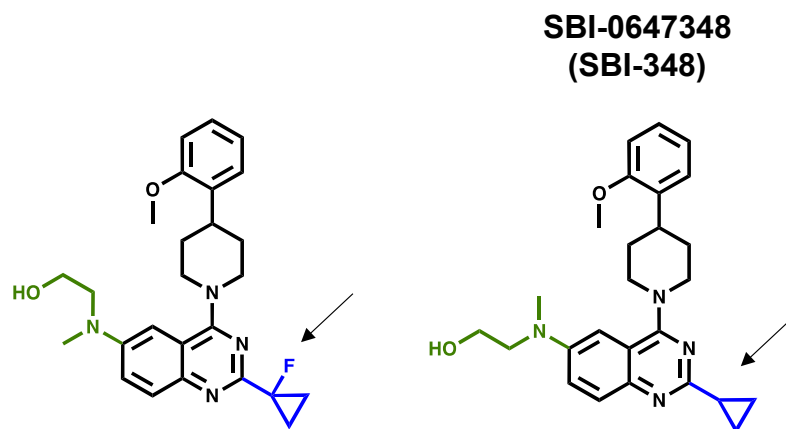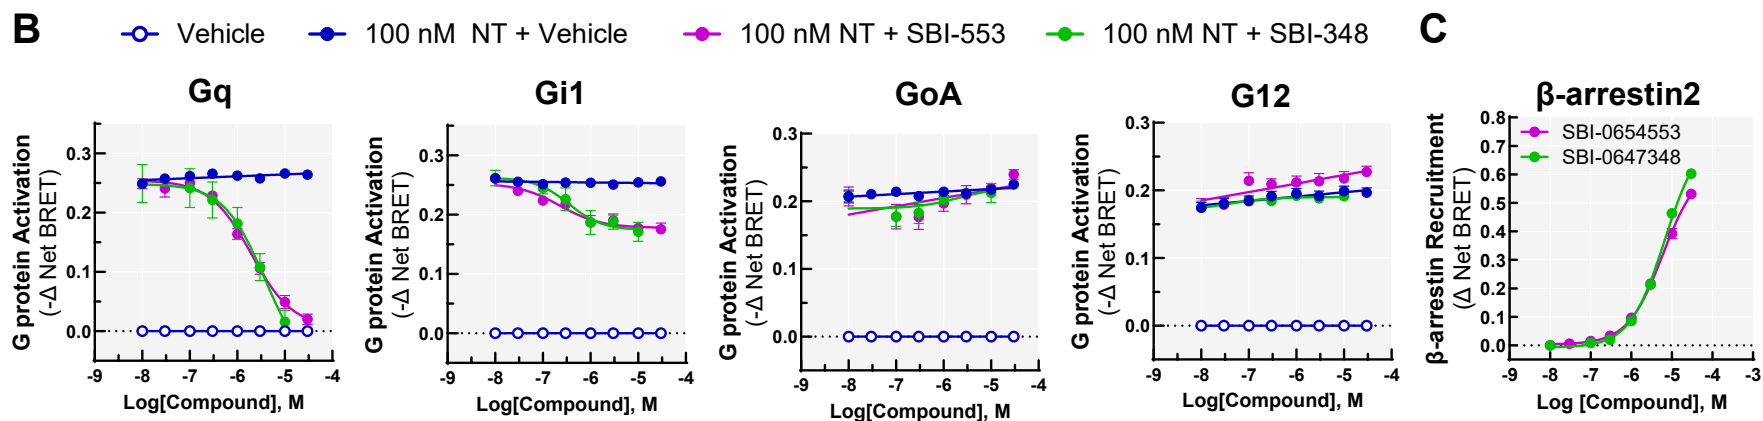

**Supplemental Figure 9. Removing SBI-553's F has no effect on G protein selectivity.** (A) Structural comparison of SBI-553 and SBI-348. Arrows indicate the fluorine that differs between SBI-553 and SBI-348. (B) In HEK293T cells transiently expressing NTSR1, SBI-348 (30 nM – 10 μM) and SBI-553 (30 nM – 30 μM) were assessed for their ability to antagonize NT-induced G protein activation using the bioluminescence resonance energy transfer 2-based TRUPATH assay. SBI-553 and SBI-348 are comparable in these assays. (C) SBI-348 and SBI-553 (30 nM – 30 μM)-induced recruitment of human β-arrestin2 to the human NTSR1 was assessed in HEK293T cells by BRET. Compounds are equally potent and efficacious in these assays. N = 3.

**Table S1. Curve parameters and statistical comparisons presented in Figure 1 – Supporting Figure 1.**

| Fig | Panel | Description                                                                   | N | Condition | Parameter        | Mean (95% CI)                         | Units       |
|-----|-------|-------------------------------------------------------------------------------|---|-----------|------------------|---------------------------------------|-------------|
| 1   | A     | Illustration                                                                  |   |           |                  |                                       |             |
| 1   | B     | Illustration                                                                  |   |           |                  |                                       |             |
| 1   | C     | TRUPATH in HEK293T cells, NTSR1 ligand-induced activation of G <sub>αq</sub>  | 3 | NT        | EC <sub>50</sub> | 3.009e-009 (2.186e-009 to 4.142e-009) | M           |
|     |       |                                                                               |   |           | Top              | 0.3131 (0.3004 to 0.3258)             | -Δ Net BRET |
|     |       |                                                                               |   | PD149163  | EC <sub>50</sub> | 9.301e-007 (6.730e-007 to 1.285e-006) | M           |
|     |       |                                                                               |   |           | Top              | 0.3367 (0.3131 to 0.3602)             | -Δ Net BRET |
|     |       |                                                                               |   | SBI-553   | Slope            | -0.001859 (-0.003554 to -0.0001651)   | M           |
|     |       |                                                                               |   |           | y-intercept      | -0.01661 (-0.02803 to -0.005187)      | -Δ Net BRET |
|     |       |                                                                               |   | SR142948A | Slope            | -0.002316 (-0.003985 to -0.0006460)   | M           |
|     |       |                                                                               |   |           | y-intercept      | -0.02105 (-0.03445 to -0.007658)      | -Δ Net BRET |
|     |       | TRUPATH in HEK293T cells, NTSR1 ligand-induced activation of G <sub>α11</sub> | 3 | NT        | EC <sub>50</sub> | 1.472e-009 (1.051e-009 to 2.063e-009) | M           |
|     |       |                                                                               |   |           | Top              | 0.2933 (0.2807 to 0.3058)             | -Δ Net BRET |
|     |       |                                                                               |   | PD149163  | EC <sub>50</sub> | 1.549e-007 (1.327e-007 to 1.807e-007) | M           |
|     |       |                                                                               |   |           | Top              | 0.2934 (0.2850 to 0.3018)             | -Δ Net BRET |
|     |       |                                                                               |   | SBI-553   | EC <sub>50</sub> | 7.648e-005 (5.192e-006 to 0.001127)   | M           |
|     |       |                                                                               |   |           | Top              | -0.06187 (-0.1445 to 0.02075)         | -Δ Net BRET |
|     |       |                                                                               |   | SR142948A | Slope            | 0.0009587(-0.0003953 to 0.002313)     | M           |
|     |       |                                                                               |   |           | y-intercept      | 0.01166 (0.0007933 to 0.02252)        | -Δ Net BRET |
|     |       | TRUPATH in HEK293T cells, NTSR1 ligand-induced activation of G <sub>α15</sub> | 3 | NT        | EC <sub>50</sub> | 1.859e-009 (1.386e-009 to 2.494e-009) | M           |
|     |       |                                                                               |   |           | Top              | 0.1630 (0.1564 to 0.1696)             | -Δ Net BRET |
|     |       |                                                                               |   | PD149163  | EC <sub>50</sub> | 2.301e-007 (1.773e-007 to 2.986e-007) | M           |
|     |       |                                                                               |   |           | Top              | 0.1734 (0.1651 to 0.1817)             | -Δ Net BRET |
|     |       |                                                                               |   | SBI-553   | EC <sub>50</sub> | 1.506e-006 (5.688e-007 to 3.988e-006) | M           |
|     |       |                                                                               |   |           | Top              | 0.08478 (0.06740 to 0.1022)           | -Δ Net BRET |
|     |       |                                                                               |   | SR142948A | Slope            | 0.002852 (-0.0002553 to 0.005960)     | M           |
|     |       |                                                                               |   |           | y-intercept      | 0.02919 (0.004257 to 0.05412)         | -Δ Net BRET |
|     |       | TRUPATH in HEK293T cells, NTSR1 ligand-induced activation of G <sub>αi1</sub> | 3 | NT        | EC <sub>50</sub> | 8.383e-009 (6.000e-009 to 1.171e-008) | M           |
|     |       |                                                                               |   |           | Top              | 0.2948 (0.2795 to 0.3101)             | -Δ Net BRET |
|     |       |                                                                               |   | PD149163  | EC <sub>50</sub> | 3.177e-006 (2.056e-006 to 4.907e-006) | M           |
|     |       |                                                                               |   |           | Top              | 0.2811 (0.2455 to 0.3166)             | -Δ Net BRET |
|     |       |                                                                               |   | SBI-553   | EC <sub>50</sub> | 2.297e-005 (1.306e-005 to 4.041e-005) | M           |
|     |       |                                                                               |   |           | Top              | 0.1583 (0.1262 to 0.1903)             | -Δ Net BRET |
|     |       |                                                                               |   | SR142948A | Slope            | -0.003421 (-0.006302 to -0.0005398)   | M           |
|     |       |                                                                               |   |           | y-intercept      | -0.02446 (-0.04758 to -0.001344)      | -Δ Net BRET |
|     |       | TRUPATH in HEK293T cells, NTSR1 ligand-induced                                | 3 | NT        | EC <sub>50</sub> | 1.341e-008 (9.697e-009 to 1.855e-008) | M           |
|     |       |                                                                               |   |           | Top              | 0.2582 (0.2448 to 0.2716)             | -Δ Net BRET |
|     |       |                                                                               |   | PD149163  | EC <sub>50</sub> | 2.243e-006 (1.775e-006 to 2.835e-006) | M           |

|                                                                                |   |    |                  |                                       |                                       |                                      |             |
|--------------------------------------------------------------------------------|---|----|------------------|---------------------------------------|---------------------------------------|--------------------------------------|-------------|
| activation of G <sub>α</sub> i2                                                |   |    |                  | Top                                   | 0.2947 (0.2760 to 0.3134)             | -Δ Net BRET                          |             |
|                                                                                |   |    |                  | SBI-553                               | EC <sub>50</sub>                      | 5.167e-005 (2.664e-005 to 0.0001002) | M           |
|                                                                                |   |    |                  | SR142948A                             | Top                                   | 0.2003 (0.1395 to 0.2611)            | -Δ Net BRET |
|                                                                                |   |    |                  |                                       | Slope                                 | -0.0005653 (-0.002768 to 0.001638)   | M           |
|                                                                                |   |    |                  |                                       | y-intercept                           | 0.005272 (-0.01240 to 0.02295)       | -Δ Net BRET |
| TRUPATH in HEK293T cells, NTSR1 ligand-induced activation of G <sub>α</sub> i3 | 3 | NT | EC <sub>50</sub> | 1.753e-008 (1.245e-008 to 2.469e-008) | M                                     |                                      |             |
|                                                                                |   |    | Top              | 0.3837 (0.3626 to 0.4047)             | -Δ Net BRET                           |                                      |             |
|                                                                                |   |    | PD149163         | EC <sub>50</sub>                      | 5.864e-006 (3.152e-006 to 1.091e-005) | M                                    |             |
|                                                                                |   |    | Top              | 0.2392 (0.1891 to 0.2894)             | -Δ Net BRET                           |                                      |             |
|                                                                                |   |    | SBI-553          | EC <sub>50</sub>                      | 1.066e-005 (4.636e-006 to 2.449e-005) | M                                    |             |
|                                                                                |   |    | Top              | 0.08170 (0.06165 to 0.1017)           | -Δ Net BRET                           |                                      |             |
|                                                                                |   |    | SR142948A        | Slope                                 | 0.001546 (-0.001045 to 0.004137)      | M                                    |             |
|                                                                                |   |    | y-intercept      | 0.03113 (0.01033 to 0.05192)          | -Δ Net BRET                           |                                      |             |
| TRUPATH in HEK293T cells, NTSR1 ligand-induced activation of G <sub>α</sub> oA | 3 | NT | EC <sub>50</sub> | 1.000e-008 (6.526e-009 to 1.533e-008) | M                                     |                                      |             |
|                                                                                |   |    | Top              | 0.2628 (0.2450 to 0.2805)             | -Δ Net BRET                           |                                      |             |
|                                                                                |   |    | PD149163         | EC <sub>50</sub>                      | 3.372e-006 (2.770e-006 to 4.105e-006) | M                                    |             |
|                                                                                |   |    | Top              | 0.2578 (0.2429 to 0.2728)             | -Δ Net BRET                           |                                      |             |
|                                                                                |   |    | SBI-553          | EC <sub>50</sub>                      | 2.409e-005 (1.195e-005 to 4.855e-005) | M                                    |             |
|                                                                                |   |    | Top              | 0.1718 (0.1280 to 0.2156)             | -Δ Net BRET                           |                                      |             |
|                                                                                |   |    | SR142948A        | Slope                                 | -0.005954 (-0.008622 to -0.003285)    | M                                    |             |
|                                                                                |   |    | y-intercept      | -0.06270 (-0.08411 to -0.04129)       | -Δ Net BRET                           |                                      |             |
| TRUPATH in HEK293T cells, NTSR1 ligand-induced activation of G <sub>α</sub> oB | 4 | NT | EC <sub>50</sub> | 2.083e-008 (1.198e-008 to 3.623e-008) | M                                     |                                      |             |
|                                                                                |   |    | Top              | 0.2591 (0.2361 to 0.2821)             | -Δ Net BRET                           |                                      |             |
|                                                                                |   |    | PD149163         | EC <sub>50</sub>                      | 3.370e-006 (2.656e-006 to 4.276e-006) | M                                    |             |
|                                                                                |   |    | Top              | 0.2511 (0.2335 to 0.2687)             | -Δ Net BRET                           |                                      |             |
|                                                                                |   |    | SBI-553          | EC <sub>50</sub>                      | 9.556e-006 (6.521e-006 to 1.400e-005) | M                                    |             |
|                                                                                |   |    | Top              | 0.1714 (0.1525 to 0.1902)             | -Δ Net BRET                           |                                      |             |
|                                                                                |   |    | SR142948A        | Slope                                 | -0.002522 (-0.006699 to 0.001654)     | M                                    |             |
|                                                                                |   |    | y-intercept      | -0.02835 (-0.06186 to 0.005159)       | -Δ Net BRET                           |                                      |             |
| TRUPATH in HEK293T cells, NTSR1 ligand-induced activation of G <sub>α</sub> z  | 3 | NT | EC <sub>50</sub> | 1.147e-008 (8.889e-009 to 1.479e-008) | M                                     |                                      |             |
|                                                                                |   |    | Top              | 0.3014 (0.2892 to 0.3137)             | -Δ Net BRET                           |                                      |             |
|                                                                                |   |    | PD149163         | EC <sub>50</sub>                      | 1.929e-006 (1.642e-006 to 2.267e-006) | M                                    |             |
|                                                                                |   |    | Top              | 0.2995 (0.2868 to 0.3122)             | -Δ Net BRET                           |                                      |             |
|                                                                                |   |    | SBI-553          | EC <sub>50</sub>                      | 2.489e-005 (7.106e-006 to 8.036e-005) | M                                    |             |
|                                                                                |   |    | Top              | 0.07472 (0.05158 to 0.1216)           | -Δ Net BRET                           |                                      |             |
|                                                                                |   |    | SR142948A        | Slope                                 | 0.0006605 (-0.0005994 to 0.001920)    | M                                    |             |
|                                                                                |   |    | y-intercept      | 0.02037 (0.01026 to 0.03048)          | -Δ Net BRET                           |                                      |             |
| TRUPATH in HEK293T cells, NTSR1 ligand-                                        | 4 | NT | EC <sub>50</sub> | 1.083e-008 (7.413e-009 to 1.581e-008) | M                                     |                                      |             |
|                                                                                |   |    | Top              | 0.09705 (0.09121 to 0.1029)           | -Δ Net BRET                           |                                      |             |

|                                                                                |                  |                                      |                  |                                       |             |
|--------------------------------------------------------------------------------|------------------|--------------------------------------|------------------|---------------------------------------|-------------|
| induced activation of G <sub>α</sub> gustducin                                 |                  | PD149163                             | EC <sub>50</sub> | 1.432e-007 (6.753e-008 to 3.035e-007) | M           |
|                                                                                |                  |                                      | Top              | 0.04144 (0.03621 to 0.04668)          | -Δ Net BRET |
|                                                                                |                  | SBI-553                              | EC <sub>50</sub> | 3.591e-006 (1.586e-006 to 8.131e-006) | M           |
|                                                                                |                  |                                      | Top              | 0.03890 (0.03131 to 0.04649)          | -Δ Net BRET |
|                                                                                |                  | SR142948A                            | Slope            | -0.0002241 (-0.001052 to 0.0006043)   | M           |
|                                                                                |                  |                                      | y-intercept      | 0.003942 (-0.002704 to 0.01059)       | -Δ Net BRET |
| TRUPATH in HEK293T cells, NTSR1 ligand-induced activation of G <sub>α</sub> 12 | 3                | NT                                   | EC <sub>50</sub> | 2.556e-008 (1.635e-008 to 3.996e-008) | M           |
|                                                                                |                  |                                      | Top              | 0.3809 (0.3534 to 0.4083)             | -Δ Net BRET |
|                                                                                |                  | PD149163                             | EC <sub>50</sub> | 5.780e-006 (3.054e-006 to 1.094e-005) | M           |
|                                                                                |                  |                                      | Top              | 0.2549 (0.2002 to 0.3096)             | -Δ Net BRET |
|                                                                                |                  | SBI-553                              | EC <sub>50</sub> | 1.742e-005 (8.940e-006 to 3.337e-005) | M           |
|                                                                                |                  |                                      | Top              | 0.2533 (0.2064 to 0.3172)             | -Δ Net BRET |
| SR142948A                                                                      | EC <sub>50</sub> | 3.860e-006 (1.247e-007 to 0.0001195) | M                |                                       |             |
|                                                                                | Top              | -0.02221 (-0.04421 to -0.0002191)    | -Δ Net BRET      |                                       |             |
| TRUPATH in HEK293T cells, NTSR1 ligand-induced activation of G <sub>α</sub> 13 | 3                | NT                                   | EC <sub>50</sub> | 1.312e-008 (1.075e-008 to 1.602e-008) | M           |
|                                                                                |                  |                                      | Top              | 0.5418 (0.5246 to 0.5591)             | -Δ Net BRET |
|                                                                                |                  | PD149163                             | EC <sub>50</sub> | 1.360e-005 (9.863e-006 to 1.876e-005) | M           |
|                                                                                |                  |                                      | Top              | 0.6957 (0.5979 to 0.7935)             | -Δ Net BRET |
|                                                                                |                  | SBI-553                              | EC <sub>50</sub> | 2.810e-005 (2.135e-005 to 3.727e-005) | M           |
|                                                                                |                  |                                      | Top              | 0.4470 (0.4035 to 0.4991)             | -Δ Net BRET |
| SR142948A                                                                      | Slope            | 0.006624 (0.004868 to 0.008379)      | M                |                                       |             |
|                                                                                | y-intercept      | 0.07884 (0.06475 to 0.09292)         | -Δ Net BRET      |                                       |             |
| TRUPATH in HEK293T cells, NTSR1 ligand-induced activation of G <sub>α</sub> sS | 4                | NT                                   | Slope            | 0.002161 (-0.003153 to 0.007476)      | M           |
|                                                                                |                  |                                      | y-intercept      | 0.02633 (-0.02045 to 0.07312)         | -Δ Net BRET |
|                                                                                |                  | PD149163                             | Slope            | -0.003440 (-0.007835 to 0.0009548)    | M           |
|                                                                                |                  |                                      | y-intercept      | -0.02678 (-0.05775 to 0.004186)       | -Δ Net BRET |
|                                                                                |                  | SBI-553                              | Slope            | -0.002718 (-0.006169 to 0.0007334)    | M           |
|                                                                                |                  |                                      | y-intercept      | -0.01960 (-0.04286 to 0.003665)       | -Δ Net BRET |
| SR142948A                                                                      | Slope            | 3.113e-005 (-0.003859 to 0.003922)   | M                |                                       |             |
|                                                                                | y-intercept      | 0.02107 (-0.009868 to 0.05201)       | -Δ Net BRET      |                                       |             |
| TRUPATH in HEK293T cells, NTSR1 ligand-induced activation of G <sub>α</sub> sL | 3                | NT                                   | Slope            | -0.003200 (-0.008678 to 0.002277)     | M           |
|                                                                                |                  |                                      | y-intercept      | 0.002161 (-0.04606 to 0.05038)        | -Δ Net BRET |
|                                                                                |                  | PD149163                             | Slope            | 0.003582 (6.715e-005 to 0.007097)     | M           |
|                                                                                |                  |                                      | y-intercept      | 0.05046 (0.02570 to 0.07523)          | -Δ Net BRET |
|                                                                                |                  | SBI-553                              | Slope            | -0.002897 (-0.007035 to 0.001242)     | M           |
|                                                                                |                  |                                      | y-intercept      | -0.02070 (-0.04860 to 0.007195)       | -Δ Net BRET |
| SR142948A                                                                      | Slope            | 0.001585 (-0.002138 to 0.005308)     | M                |                                       |             |
|                                                                                | y-intercept      | 0.03624 (0.006632 to 0.06585)        | -Δ Net BRET      |                                       |             |

**1 D** Maximal NTSR1 ligand-induced G protein activation by TRUPATH, two-way ANOVA followed by Tukey multiple comparisons tests. N = 3

$F_{G \text{ protein}}(13, 490) = 140.1$      $P < 0.0001$   
 $F_{Ligand}(3, 490) = 1028$      $P < 0.0001$   
 $F_{Interaction}(39, 490) = 33.75$      $P < 0.0001$

Colored asterisks over each bar indicate the treatments from which that compound significantly differed at that G protein.  
 \* $p < 0.05$ , Treatment vs NT (\*), SR142948A (\*), PD149163 (\*), SBI-553(\*)

**1 E** Maximal SBI-553-induced G protein activation by TRUPATH in NTSR1 expressing and non-expressing cells, two-way ANOVA followed by Bonferroni multiple comparisons tests. N = 3

$F_{G \text{ protein}}(7, 127) = 38.09$      $P < 0.0001$   
 $F_{Cell-type}(1, 127) = 625.2$      $P < 0.0001$   
 $F_{Interaction}(7, 127) = 9.236$      $P < 0.0001$

\* $p < 0.0001$

**1 F** Illustration

|            |                                                       |                                    |                   |                                       |                                       |                   |
|------------|-------------------------------------------------------|------------------------------------|-------------------|---------------------------------------|---------------------------------------|-------------------|
| <b>1 G</b> | NTSR1 ligand-induced activation of $\beta$ -arrestin1 | 3                                  | NT                | EC <sub>50</sub>                      | 8.594e-009 (6.806e-009 to 1.085e-008) | M                 |
|            |                                                       |                                    |                   | Top                                   | 0.4769 (0.4596 to 0.4942)             | $\Delta$ Net BRET |
|            |                                                       | PD149163                           | EC <sub>50</sub>  | 1.247e-006 (9.151e-007 to 1.698e-006) | M                                     |                   |
|            |                                                       |                                    | Top               | 0.3592 (0.3322 to 0.3861)             | $\Delta$ Net BRET                     |                   |
|            |                                                       |                                    | SBI-553           | EC <sub>50</sub>                      | 2.043e-005 (1.716e-005 to 2.433e-005) | M                 |
|            |                                                       |                                    | Top               | 0.5666 (0.5322 to 0.6010)             | $\Delta$ Net BRET                     |                   |
| SR142948A  | Slope                                                 | 0.0003879 (0.0001093 to 0.0006665) | M                 |                                       |                                       |                   |
|            | y-intercept                                           | 0.004380 (0.002145 to 0.006616)    | $\Delta$ Net BRET |                                       |                                       |                   |

|           |                                                       |                                   |                   |                                       |                                       |                   |
|-----------|-------------------------------------------------------|-----------------------------------|-------------------|---------------------------------------|---------------------------------------|-------------------|
|           | NTSR1 ligand-induced activation of $\beta$ -arrestin2 | 3                                 | NT                | EC <sub>50</sub>                      | 8.000e-009 (6.901e-009 to 9.275e-009) | M                 |
|           |                                                       |                                   |                   | Top                                   | 0.5878 (0.5744 to 0.6013)             | $\Delta$ Net BRET |
|           |                                                       | PD149163                          | EC <sub>50</sub>  | 3.616e-007 (2.925e-007 to 4.471e-007) | M                                     |                   |
|           |                                                       |                                   | Top               | 0.5482 (0.5250 to 0.5714)             | $\Delta$ Net BRET                     |                   |
|           |                                                       |                                   | SBI-553           | EC <sub>50</sub>                      | 1.423e-005 (1.199e-005 to 1.689e-005) | M                 |
|           |                                                       |                                   | Top               | 0.7275 (0.6881 to 0.7669)             | $\Delta$ Net BRET                     |                   |
| SR142948A | Slope                                                 | 0.0009235 (-0.001006 to 0.002853) | M                 |                                       |                                       |                   |
|           | y-intercept                                           | 0.01039 (-0.005099 to 0.02587)    | $\Delta$ Net BRET |                                       |                                       |                   |

**1 H** Radar plots

**1 I** Illustration

|                  |                                                          |                 |                  |                                       |                                       |               |
|------------------|----------------------------------------------------------|-----------------|------------------|---------------------------------------|---------------------------------------|---------------|
| <b>1 J, left</b> | NT-induced G protein activation by TGF $\alpha$ Shedding | 3               | G $\alpha$ q     | EC <sub>50</sub>                      | 9.592e-011 (7.268e-011 to 1.271e-010) | M             |
|                  |                                                          |                 |                  | Top                                   | 21.38 (20.62 to 22.14)                | % AP Shedding |
|                  | 3                                                        | G $\alpha$ 14   | EC <sub>50</sub> | 1.462e-010 (8.506e-011 to 2.594e-010) | M                                     |               |
|                  |                                                          |                 | Top              | 17.08 (15.80 to 18.40)                | % AP Shedding                         |               |
|                  | 3                                                        | G $\alpha$ 16   | EC <sub>50</sub> | 1.241e-008 (8.276e-009 to 1.885e-008) | M                                     |               |
|                  |                                                          |                 | Top              | 17.74 (16.43 to 19.11)                | % AP Shedding                         |               |
|                  | 3                                                        | G $\alpha$ i1/2 | EC <sub>50</sub> | 8.692e-010 (6.207e-010 to 1.214e-009) | M                                     |               |
|                  |                                                          |                 | Top              | 21.31 (20.27 to 22.36)                | % AP Shedding                         |               |
|                  | 3                                                        | G $\alpha$ o    | EC <sub>50</sub> | 1.334e-009 (7.374e-010 to 2.481e-009) | M                                     |               |
|                  |                                                          |                 | Top              | 13.48 (12.07 to 14.98)                | % AP Shedding                         |               |
|                  | 3                                                        | G $\alpha$ olf  | EC <sub>50</sub> | 2.120e-009 (7.402e-010 to 7.127e-009) | M                                     |               |
|                  |                                                          |                 | Top              | 9.830 (8.177 to 11.91)                | % AP Shedding                         |               |



|          |                 |                                                                                                                                                    |   |                     |                  |                                       |               |
|----------|-----------------|----------------------------------------------------------------------------------------------------------------------------------------------------|---|---------------------|------------------|---------------------------------------|---------------|
|          |                 |                                                                                                                                                    | 3 | G <sub>α</sub> z    | EC <sub>50</sub> | 3.083e-010 (9.698e-011 to 9.448e-010) | M             |
|          |                 |                                                                                                                                                    |   |                     | Top              | 7.338 (5.943 to 8.821)                | % AP Shedding |
|          |                 |                                                                                                                                                    | 3 | G <sub>α</sub> s    | EC <sub>50</sub> | 4.314e-009 (3.562e-009 to 5.211e-009) | M             |
|          |                 |                                                                                                                                                    |   |                     | Top              | -0.1547 (-0.6071 to 0.2952)           | % AP Shedding |
|          |                 |                                                                                                                                                    | 3 | G <sub>α</sub> 12   | EC <sub>50</sub> | 1.165e-009 (5.450e-010 to 2.289e-009) | M             |
|          |                 |                                                                                                                                                    |   |                     | Top              | 13.48 (11.68 to 15.40)                | % AP Shedding |
|          |                 |                                                                                                                                                    | 3 | G <sub>α</sub> 13   | EC <sub>50</sub> | 1.155e-009 (5.568e-010 to 2.475e-009) | M             |
|          |                 |                                                                                                                                                    |   |                     | Top              | 14.00 (12.27 to 15.84)                | % AP Shedding |
|          |                 |                                                                                                                                                    | 3 | G <sub>α</sub> ΔC   | EC <sub>50</sub> | 1.288e-010 (1.778e-011 to 1.328e-009) | M             |
|          |                 |                                                                                                                                                    |   |                     | Top              | 0.9097 (0.5226 to 1.329)              | % AP Shedding |
| <b>1</b> | <b>J, right</b> | SBI-553-induced G protein activation by TGFα Shedding                                                                                              | 3 | G <sub>α</sub> q    | EC <sub>50</sub> | 4.030e-007 (ND)                       | M             |
|          |                 |                                                                                                                                                    |   |                     | Top              | 0.8005 (ND)                           | % AP Shedding |
|          |                 |                                                                                                                                                    | 3 | G <sub>α</sub> 14   | EC <sub>50</sub> | 7.126e-006 (ND)                       | M             |
|          |                 |                                                                                                                                                    |   |                     | Top              | 7.408 (ND)                            | % AP Shedding |
|          |                 |                                                                                                                                                    | 3 | G <sub>α</sub> 16   | EC <sub>50</sub> | ~0.007718 (ND)                        | M             |
|          |                 |                                                                                                                                                    |   |                     | Top              | ~2632 (ND)                            | % AP Shedding |
|          |                 |                                                                                                                                                    | 3 | G <sub>α</sub> i1/2 | EC <sub>50</sub> | 1.661e-005 (ND)                       | M             |
|          |                 |                                                                                                                                                    |   |                     | Top              | 8.721 (ND)                            | % AP Shedding |
|          |                 |                                                                                                                                                    | 3 | G <sub>α</sub> o    | EC <sub>50</sub> | 2.447e-006 (1.043e-006 to 1.129e-005) | M             |
|          |                 |                                                                                                                                                    |   |                     | Top              | 9.421 (7.279 to 16.13)                | % AP Shedding |
|          |                 |                                                                                                                                                    | 3 | G <sub>α</sub> olf  | EC <sub>50</sub> | 1.321e-007 (2.634e-008 to 8.655e-007) | M             |
|          |                 |                                                                                                                                                    |   |                     | Top              | 1.244 (0.8548 to 1.730)               | % AP Shedding |
|          |                 |                                                                                                                                                    | 3 | G <sub>α</sub> z    | EC <sub>50</sub> | ~0.001822 (ND)                        | M             |
|          |                 |                                                                                                                                                    |   |                     | Top              | ~714.1 (ND)                           | % AP Shedding |
|          |                 |                                                                                                                                                    | 3 | G <sub>α</sub> s    | EC <sub>50</sub> | 3.354e-006 (ND)                       | M             |
|          |                 |                                                                                                                                                    |   |                     | Top              | 0.3948 (ND)                           | % AP Shedding |
|          |                 |                                                                                                                                                    | 3 | G <sub>α</sub> 12   | EC <sub>50</sub> | 3.165e-007 (1.225e-007 to 8.086e-007) | M             |
|          |                 |                                                                                                                                                    |   |                     | Top              | 10.64 (8.278 to 13.27)                | % AP Shedding |
|          |                 |                                                                                                                                                    | 3 | G <sub>α</sub> 13   | EC <sub>50</sub> | 5.878e-006 (ND)                       | M             |
|          |                 |                                                                                                                                                    |   |                     | Top              | 12.66 (ND)                            | % AP Shedding |
|          |                 |                                                                                                                                                    | 3 | G <sub>α</sub> ΔC   | EC <sub>50</sub> | 2.482e-008 (ND)                       | M             |
|          |                 |                                                                                                                                                    |   |                     | Top              | 0.209 (ND)                            | % AP Shedding |
| <b>1</b> | <b>K</b>        | Maximal NTSR1 ligand-induced G protein activation by AP-TGFα shedding assay, two-way ANOVA followed by Bonferroni multiple comparisons test. N = 3 |   |                     |                  |                                       |               |
|          |                 | F <sub>G protein</sub> (11, 263) = 17.50                                                                                                           |   | P<0.0001            |                  |                                       |               |
|          |                 | F <sub>Ligand</sub> (1, 263) = 435.4                                                                                                               |   | P<0.0001            |                  |                                       |               |
|          |                 | F <sub>Interaction</sub> (11, 263) = 17.57                                                                                                         |   | P<0.0001            |                  |                                       |               |
|          |                 | *p<0.05, as compared to GΔC, unless otherwise indicated                                                                                            |   |                     |                  |                                       |               |

CI, confidence interval; NT, neurotensin; SBI-553, SBI-0654553; EC<sub>50</sub>, half-maximal effective concentration; ND, not defined

**Table S2. Curve parameters and statistical comparisons presented in Figure 2 – Supporting Figure 2.**

| Fig | Panel                                                           | Description                                                      | N                     | Condition             | Parameter                             | Mean (95% CI)                         | Units               |
|-----|-----------------------------------------------------------------|------------------------------------------------------------------|-----------------------|-----------------------|---------------------------------------|---------------------------------------|---------------------|
| 2   | A                                                               | Illustration                                                     |                       |                       |                                       |                                       |                     |
| 2   | B                                                               | Illustration                                                     |                       |                       |                                       |                                       |                     |
| 2   | C                                                               | Effect of SR142948A on NT-induced $\beta$ -arrestin1 recruitment | 3                     | 0 nM SR142948A        | EC <sub>50</sub>                      | 1.521e-008 (1.074e-008 to 2.156e-008) | M                   |
|     |                                                                 |                                                                  |                       |                       | Top                                   | 0.4559 (0.4396 to 0.4723)             | - $\Delta$ Net BRET |
|     |                                                                 |                                                                  |                       | 10 nM SR142948A       | EC <sub>50</sub>                      | 3.074e-008 (2.136e-008 to 4.424e-008) | M                   |
|     |                                                                 |                                                                  |                       | Top                   | Shared                                | - $\Delta$ Net BRET                   |                     |
|     |                                                                 |                                                                  |                       | 100 nM SR142948A      | EC <sub>50</sub>                      | 1.281e-007 (9.077e-008 to 1.809e-007) | M                   |
|     |                                                                 |                                                                  |                       | Top                   | Shared                                | - $\Delta$ Net BRET                   |                     |
|     |                                                                 |                                                                  |                       | 1 $\mu$ M SR142948A   | EC <sub>50</sub>                      | 6.967e-007 (4.925e-007 to 9.855e-007) | M                   |
|     |                                                                 |                                                                  |                       | Top                   | Shared                                | - $\Delta$ Net BRET                   |                     |
|     |                                                                 |                                                                  |                       | 10 $\mu$ M SR142948A  | EC <sub>50</sub>                      | 4.454e-006 (3.113e-006 to 6.371e-006) | M                   |
|     |                                                                 |                                                                  |                       | Top                   | Shared                                | - $\Delta$ Net BRET                   |                     |
|     |                                                                 |                                                                  |                       | 100 $\mu$ M SR142948A | EC <sub>50</sub>                      | 1.974e-005 (1.323e-005 to 2.947e-005) | M                   |
|     |                                                                 |                                                                  |                       | Top                   | Shared                                | - $\Delta$ Net BRET                   |                     |
|     | C                                                               | Effect of SR142948A on NT-induced $\beta$ -arrestin2 recruitment | 3                     | 0 nM SR142948A        | EC <sub>50</sub>                      | 7.796e-009 (6.234e-009 to 9.750e-009) | M                   |
|     |                                                                 |                                                                  |                       |                       | Top                                   | 0.5180 (0.5065 to 0.5294)             | - $\Delta$ Net BRET |
|     |                                                                 |                                                                  |                       | 10 nM SR142948A       | EC <sub>50</sub>                      | 2.015e-008 (1.600e-008 to 2.538e-008) | M                   |
|     |                                                                 |                                                                  |                       | Top                   | Shared                                | - $\Delta$ Net BRET                   |                     |
|     |                                                                 |                                                                  |                       | 100 nM SR142948A      | EC <sub>50</sub>                      | 1.014e-007 (8.124e-008 to 1.266e-007) | M                   |
|     |                                                                 |                                                                  |                       | Top                   | Shared                                | - $\Delta$ Net BRET                   |                     |
|     |                                                                 |                                                                  |                       | 1 $\mu$ M SR142948A   | EC <sub>50</sub>                      | 4.048e-007 (3.204e-007 to 5.115e-007) | M                   |
|     |                                                                 |                                                                  |                       | Top                   | Shared                                | - $\Delta$ Net BRET                   |                     |
|     |                                                                 |                                                                  |                       | 10 $\mu$ M SR142948A  | EC <sub>50</sub>                      | 3.147e-006 (2.489e-006 to 3.978e-006) | M                   |
|     |                                                                 |                                                                  |                       | Top                   | Shared                                | - $\Delta$ Net BRET                   |                     |
|     |                                                                 |                                                                  |                       | 100 $\mu$ M SR142948A | EC <sub>50</sub>                      | 1.469e-005 (1.156e-005 to 1.867e-005) | M                   |
|     |                                                                 |                                                                  |                       | Top                   | Shared                                | - $\Delta$ Net BRET                   |                     |
| D   | Effect of SR142948A on NT-induced activation of G <sub>αq</sub> | 3                                                                | 0 nM SR142948A        | EC <sub>50</sub>      | 3.301e-009 (2.304e-009 to 4.729e-009) | M                                     |                     |
|     |                                                                 |                                                                  |                       | Top                   | 0.3204 (0.3108 to 0.3300)             | - $\Delta$ Net BRET                   |                     |
|     |                                                                 |                                                                  | 10 nM SR142948A       | EC <sub>50</sub>      | 5.654e-009 (3.988e-009 to 8.015e-009) | M                                     |                     |
|     |                                                                 |                                                                  | Top                   | Shared                | - $\Delta$ Net BRET                   |                                       |                     |
|     |                                                                 |                                                                  | 100 nM SR142948A      | EC <sub>50</sub>      | 3.537e-008 (2.470e-008 to 5.065e-008) | M                                     |                     |
|     |                                                                 |                                                                  | Top                   | Shared                | - $\Delta$ Net BRET                   |                                       |                     |
|     |                                                                 |                                                                  | 1 $\mu$ M SR142948A   | EC <sub>50</sub>      | 8.479e-008 (6.035e-008 to 1.191e-007) | M                                     |                     |
|     |                                                                 |                                                                  | Top                   | Shared                | - $\Delta$ Net BRET                   |                                       |                     |
|     |                                                                 |                                                                  | 10 $\mu$ M SR142948A  | EC <sub>50</sub>      | 1.007e-006 (7.179e-007 to 1.412e-006) | M                                     |                     |
|     |                                                                 |                                                                  | Top                   | Shared                | - $\Delta$ Net BRET                   |                                       |                     |
|     |                                                                 |                                                                  | 100 $\mu$ M SR142948A | EC <sub>50</sub>      | 6.564e-006 (4.636e-006 to 9.295e-006) | M                                     |                     |

|                                                                   |                  |                                       |                                       |                                       |             |
|-------------------------------------------------------------------|------------------|---------------------------------------|---------------------------------------|---------------------------------------|-------------|
|                                                                   |                  |                                       | Top                                   | Shared                                | -Δ Net BRET |
| Effect of SR142948A on NT-induced activation of G <sub>α</sub> 11 | 3                | 0 nM SR142948A                        | EC <sub>50</sub>                      | 2.095e-009 (1.536e-009 to 2.856e-009) | M           |
|                                                                   |                  |                                       | Top                                   | 0.2658 (0.2587 to 0.2730)             | -Δ Net BRET |
|                                                                   | 10 nM SR142948A  | EC <sub>50</sub>                      | 8.888e-009 (6.447e-009 to 1.225e-008) | M                                     |             |
|                                                                   |                  | Top                                   | Shared                                | -Δ Net BRET                           |             |
|                                                                   | 100 nM SR142948A | EC <sub>50</sub>                      | 2.697e-008 (1.969e-008 to 3.694e-008) | M                                     |             |
|                                                                   |                  | Top                                   | Shared                                | -Δ Net BRET                           |             |
|                                                                   | 1 μM SR142948A   | EC <sub>50</sub>                      | 1.071e-007 (7.953e-008 to 1.442e-007) | M                                     |             |
|                                                                   |                  | Top                                   | Shared                                | -Δ Net BRET                           |             |
|                                                                   | 10 μM SR142948A  | EC <sub>50</sub>                      | 7.059e-007 (5.225e-007 to 9.536e-007) | M                                     |             |
| Top                                                               |                  | Shared                                | -Δ Net BRET                           |                                       |             |
| 100 μM SR142948A                                                  | EC <sub>50</sub> | 4.171e-006 (3.050e-006 to 5.704e-006) | M                                     |                                       |             |
|                                                                   | Top              | Shared                                | -Δ Net BRET                           |                                       |             |
| Effect of SR142948A on NT-induced activation of G <sub>α</sub> 15 | 3                | 0 nM SR142948A                        | EC <sub>50</sub>                      | 2.530e-009 (1.764e-009 to 3.629e-009) | M           |
|                                                                   |                  |                                       | Top                                   | 0.1377 (0.1306 to 0.1447)             | -Δ Net BRET |
|                                                                   | 10 nM SR142948A  | EC <sub>50</sub>                      | 8.222e-009 (5.832e-009 to 1.159e-008) | M                                     |             |
|                                                                   |                  | Top                                   | Shared                                | -Δ Net BRET                           |             |
|                                                                   | 100 nM SR142948A | EC <sub>50</sub>                      | 3.429e-008 (2.391e-008 to 4.916e-008) | M                                     |             |
|                                                                   |                  | Top                                   | Shared                                | -Δ Net BRET                           |             |
|                                                                   | 1 μM SR142948A   | EC <sub>50</sub>                      | 1.370e-007 (9.696e-008 to 1.936e-007) | M                                     |             |
|                                                                   |                  | Top                                   | Shared                                | -Δ Net BRET                           |             |
|                                                                   | 10 μM SR142948A  | EC <sub>50</sub>                      | 8.528e-007 (5.711e-007 to 1.274e-006) | M                                     |             |
| Top                                                               |                  | Shared                                | -Δ Net BRET                           |                                       |             |
| 100 μM SR142948A                                                  | EC <sub>50</sub> | 6.366e-006 (2.529e-006 to 1.602e-005) | M                                     |                                       |             |
|                                                                   | Top              | Shared                                | -Δ Net BRET                           |                                       |             |
| Effect of SR142948A on NT-induced activation of G <sub>α</sub> i1 | 3                | 0 nM SR142948A                        | EC <sub>50</sub>                      | 1.155e-008 (7.537e-009 to 1.769e-008) | M           |
|                                                                   |                  |                                       | Top                                   | 0.2965 (0.2847 to 0.3083)             | -Δ Net BRET |
|                                                                   | 10 nM SR142948A  | EC <sub>50</sub>                      | 1.879e-008 (1.210e-008 to 2.917e-008) | M                                     |             |
|                                                                   |                  | Top                                   | Shared                                | -Δ Net BRET                           |             |
|                                                                   | 100 nM SR142948A | EC <sub>50</sub>                      | 5.576e-008 (3.595e-008 to 8.649e-008) | M                                     |             |
|                                                                   |                  | Top                                   | Shared                                | -Δ Net BRET                           |             |
|                                                                   | 1 μM SR142948A   | EC <sub>50</sub>                      | 2.804e-007 (1.720e-007 to 4.572e-007) | M                                     |             |
|                                                                   |                  | Top                                   | Shared                                | -Δ Net BRET                           |             |
|                                                                   | 10 μM SR142948A  | EC <sub>50</sub>                      | 1.994e-006 (1.237e-006 to 3.216e-006) | M                                     |             |
| Top                                                               |                  | Shared                                | -Δ Net BRET                           |                                       |             |
| 100 μM SR142948A                                                  | EC <sub>50</sub> | 1.789e-005 (1.102e-005 to 2.904e-005) | M                                     |                                       |             |
|                                                                   | Top              | Shared                                | -Δ Net BRET                           |                                       |             |
| Effect of SR142948A on NT-induced activation of                   | 3                | 0 nM SR142948A                        | EC <sub>50</sub>                      | 6.891e-009 (4.193e-009 to 1.133e-008) | M           |
|                                                                   |                  |                                       | Top                                   | 0.2365 (0.2235 to 0.2495)             | -Δ Net BRET |

|                                                                   |                                                                   |                  |                                       |                                       |             |
|-------------------------------------------------------------------|-------------------------------------------------------------------|------------------|---------------------------------------|---------------------------------------|-------------|
| G <sub>α</sub> i2                                                 | 10 nM SR142948A                                                   | EC <sub>50</sub> | 1.670e-008 (1.012e-008 to 2.756e-008) | M                                     |             |
|                                                                   |                                                                   | Top              | Shared                                | -Δ Net BRET                           |             |
|                                                                   | 100 nM SR142948A                                                  | EC <sub>50</sub> | 3.888e-008 (2.317e-008 to 6.523e-008) | M                                     |             |
|                                                                   |                                                                   | Top              | Shared                                | -Δ Net BRET                           |             |
|                                                                   | 1 μM SR142948A                                                    | EC <sub>50</sub> | 2.413e-007 (1.442e-007 to 4.037e-007) | M                                     |             |
|                                                                   |                                                                   | Top              | Shared                                | -Δ Net BRET                           |             |
|                                                                   | 10 μM SR142948A                                                   | EC <sub>50</sub> | 2.306e-006 (1.383e-006 to 3.845e-006) | M                                     |             |
|                                                                   |                                                                   | Top              | Shared                                | -Δ Net BRET                           |             |
|                                                                   | 100 μM SR142948A                                                  | EC <sub>50</sub> | 7.712e-006 (4.683e-006 to 1.270e-005) | M                                     |             |
|                                                                   |                                                                   | Top              | Shared                                | -Δ Net BRET                           |             |
|                                                                   | Effect of SR142948A on NT-induced activation of G <sub>α</sub> i3 | 3 0 nM SR142948A | EC <sub>50</sub>                      | 1.960e-008 (1.512e-008 to 2.541e-008) | M           |
|                                                                   |                                                                   |                  | Top                                   | 0.4220 (0.4104 to 0.4337)             | -Δ Net BRET |
| 10 nM SR142948A                                                   |                                                                   | EC <sub>50</sub> | 5.137e-008 (3.960e-008 to 6.663e-008) | M                                     |             |
|                                                                   |                                                                   | Top              | Shared                                | -Δ Net BRET                           |             |
| 100 nM SR142948A                                                  |                                                                   | EC <sub>50</sub> | 1.690e-007 (1.308e-007 to 2.184e-007) | M                                     |             |
|                                                                   |                                                                   | Top              | Shared                                | -Δ Net BRET                           |             |
| 1 μM SR142948A                                                    |                                                                   | EC <sub>50</sub> | 8.335e-007 (6.487e-007 to 1.071e-006) | M                                     |             |
|                                                                   |                                                                   | Top              | Shared                                | -Δ Net BRET                           |             |
| 10 μM SR142948A                                                   |                                                                   | EC <sub>50</sub> | 5.731e-006 (4.433e-006 to 7.410e-006) | M                                     |             |
|                                                                   |                                                                   | Top              | Shared                                | -Δ Net BRET                           |             |
| 100 μM SR142948A                                                  |                                                                   | EC <sub>50</sub> | 2.075e-005 (1.543e-005 to 2.792e-005) | M                                     |             |
|                                                                   |                                                                   | Top              | Shared                                | -Δ Net BRET                           |             |
| Effect of SR142948A on NT-induced activation of G <sub>α</sub> oA | 3 0 nM SR142948A                                                  | EC <sub>50</sub> | 1.188e-008 (8.965e-009 to 1.575e-008) | M                                     |             |
|                                                                   |                                                                   | Top              | 0.2953 (0.2871 to 0.3036)             | -Δ Net BRET                           |             |
|                                                                   | 10 nM SR142948A                                                   | EC <sub>50</sub> | 4.005e-008 (2.977e-008 to 5.388e-008) | M                                     |             |
|                                                                   |                                                                   | Top              | Shared                                | -Δ Net BRET                           |             |
|                                                                   | 100 nM SR142948A                                                  | EC <sub>50</sub> | 9.890e-008 (7.468e-008 to 1.310e-007) | M                                     |             |
|                                                                   |                                                                   | Top              | Shared                                | -Δ Net BRET                           |             |
|                                                                   | 1 μM SR142948A                                                    | EC <sub>50</sub> | 4.795e-007 (3.578e-007 to 6.426e-007) | M                                     |             |
|                                                                   |                                                                   | Top              | Shared                                | -Δ Net BRET                           |             |
|                                                                   | 10 μM SR142948A                                                   | EC <sub>50</sub> | 2.446e-006 (1.823e-006 to 3.282e-006) | M                                     |             |
|                                                                   |                                                                   | Top              | Shared                                | -Δ Net BRET                           |             |
|                                                                   | 100 μM SR142948A                                                  | EC <sub>50</sub> | 1.233e-005 (9.197e-006 to 1.653e-005) | M                                     |             |
|                                                                   |                                                                   | Top              | Shared                                | -Δ Net BRET                           |             |
| Effect of SR142948A on NT-induced activation of G <sub>α</sub> oB | 4 0 nM SR142948A                                                  | EC <sub>50</sub> | 2.445e-008 (1.755e-008 to 3.406e-008) | M                                     |             |
|                                                                   |                                                                   | Top              | 0.2818 (0.2721 to 0.2914)             | -Δ Net BRET                           |             |
|                                                                   | 10 nM SR142948A                                                   | EC <sub>50</sub> | 5.159e-008 (3.720e-008 to 7.155e-008) | M                                     |             |
|                                                                   |                                                                   | Top              | Shared                                | -Δ Net BRET                           |             |
|                                                                   | 100 nM SR142948A                                                  | EC <sub>50</sub> | 1.480e-007 (1.076e-007 to 2.037e-007) | M                                     |             |
|                                                                   |                                                                   | Top              | Shared                                | -Δ Net BRET                           |             |

|                                                                          |                  |                                       |                                       |                                       |             |
|--------------------------------------------------------------------------|------------------|---------------------------------------|---------------------------------------|---------------------------------------|-------------|
|                                                                          |                  |                                       | Top                                   | Shared                                | -Δ Net BRET |
|                                                                          |                  | 1 μM SR142948A                        | EC <sub>50</sub>                      | 5.734e-007 (4.149e-007 to 7.923e-007) | M           |
|                                                                          |                  |                                       | Top                                   | Shared                                | -Δ Net BRET |
|                                                                          |                  | 10 μM SR142948A                       | EC <sub>50</sub>                      | 2.767e-006 (1.987e-006 to 3.853e-006) | M           |
|                                                                          |                  |                                       | Top                                   | Shared                                | -Δ Net BRET |
|                                                                          |                  | 100 μM SR142948A                      | EC <sub>50</sub>                      | 1.176e-005 (8.494e-006 to 1.628e-005) | M           |
|                                                                          |                  |                                       | Top                                   | Shared                                | -Δ Net BRET |
| Effect of SR142948A on NT-induced activation of G <sub>α</sub> Z         | 3                | 0 nM SR142948A                        | EC <sub>50</sub>                      | 8.419e-009 (6.582e-009 to 1.077e-008) | M           |
|                                                                          |                  |                                       | Top                                   | 0.2930 (0.2857 to 0.3003)             | -Δ Net BRET |
|                                                                          | 10 nM SR142948A  | EC <sub>50</sub>                      | 2.706e-008 (2.088e-008 to 3.507e-008) | M                                     |             |
|                                                                          |                  | Top                                   | Shared                                | -Δ Net BRET                           |             |
|                                                                          | 100 nM SR142948A | EC <sub>50</sub>                      | 7.732e-008 (6.040e-008 to 9.898e-008) | M                                     |             |
|                                                                          |                  | Top                                   | Shared                                | -Δ Net BRET                           |             |
|                                                                          | 1 μM SR142948A   | EC <sub>50</sub>                      | 4.139e-007 (3.198e-007 to 5.357e-007) | M                                     |             |
|                                                                          |                  | Top                                   | Shared                                | -Δ Net BRET                           |             |
|                                                                          | 10 μM SR142948A  | EC <sub>50</sub>                      | 2.848e-006 (2.200e-006 to 3.688e-006) | M                                     |             |
|                                                                          |                  | Top                                   | Shared                                | -Δ Net BRET                           |             |
| 100 μM SR142948A                                                         | EC <sub>50</sub> | 1.500e-005 (1.150e-005 to 1.956e-005) | M                                     |                                       |             |
|                                                                          | Top              | Shared                                | -Δ Net BRET                           |                                       |             |
| Effect of SR142948A on NT-induced activation of G <sub>α</sub> gustducin | 4                | 0 nM SR142948A                        | EC <sub>50</sub>                      | 1.585e-008 (8.262e-009 to 3.042e-008) | M           |
|                                                                          |                  |                                       | Top                                   | 0.06952 (0.06502 to 0.07403)          | -Δ Net BRET |
|                                                                          | 10 nM SR142948A  | EC <sub>50</sub>                      | 9.301e-008 (4.900e-008 to 1.765e-007) | M                                     |             |
|                                                                          |                  | Top                                   | Shared                                | -Δ Net BRET                           |             |
|                                                                          | 100 nM SR142948A | EC <sub>50</sub>                      | 3.400e-007 (1.724e-007 to 6.706e-007) | M                                     |             |
|                                                                          |                  | Top                                   | Shared                                | -Δ Net BRET                           |             |
|                                                                          | 1 μM SR142948A   | EC <sub>50</sub>                      | 9.267e-007 (4.894e-007 to 1.755e-006) | M                                     |             |
|                                                                          |                  | Top                                   | Shared                                | -Δ Net BRET                           |             |
|                                                                          | 10 μM SR142948A  | EC <sub>50</sub>                      | 6.241e-006 (3.252e-006 to 1.198e-005) | M                                     |             |
|                                                                          |                  | Top                                   | Shared                                | -Δ Net BRET                           |             |
| 100 μM SR142948A                                                         | EC <sub>50</sub> | 4.828e-005 (1.499e-005 to 0.0001555)  | M                                     |                                       |             |
|                                                                          | Top              | Shared                                | -Δ Net BRET                           |                                       |             |
| Effect of SR142948A on NT-induced activation of G <sub>α</sub> 12        | 3                | 0 nM SR142948A                        | EC <sub>50</sub>                      | 1.388e-008 (8.070e-009 to 2.389e-008) | M           |
|                                                                          |                  |                                       | Top                                   | 0.3578 (0.3370 to 0.3786)             | -Δ Net BRET |
|                                                                          | 10 nM SR142948A  | EC <sub>50</sub>                      | 3.305e-008 (1.868e-008 to 5.845e-008) | M                                     |             |
|                                                                          |                  | Top                                   | Shared                                | -Δ Net BRET                           |             |
|                                                                          | 100 nM SR142948A | EC <sub>50</sub>                      | 1.145e-007 (6.684e-008 to 1.960e-007) | M                                     |             |
|                                                                          |                  | Top                                   | Shared                                | -Δ Net BRET                           |             |
| 1 μM SR142948A                                                           | EC <sub>50</sub> | 5.366e-007 (3.081e-007 to 9.344e-007) | M                                     |                                       |             |
|                                                                          | Top              | Shared                                | -Δ Net BRET                           |                                       |             |

|          |                                                               |                                                                |                                                                                                                                         |                   |                                       |                                       |                                       |                                 |                   |
|----------|---------------------------------------------------------------|----------------------------------------------------------------|-----------------------------------------------------------------------------------------------------------------------------------------|-------------------|---------------------------------------|---------------------------------------|---------------------------------------|---------------------------------|-------------------|
|          |                                                               |                                                                | 10 $\mu$ M SR142948A                                                                                                                    | EC <sub>50</sub>  | 3.542e-006 (2.011e-006 to 6.239e-006) | M                                     |                                       |                                 |                   |
|          |                                                               |                                                                |                                                                                                                                         | Top               | Shared                                | - $\Delta$ Net BRET                   |                                       |                                 |                   |
|          |                                                               |                                                                | 100 $\mu$ M SR142948A                                                                                                                   | EC <sub>50</sub>  | 2.271e-005 (1.172e-005 to 4.400e-005) | M                                     |                                       |                                 |                   |
|          |                                                               |                                                                |                                                                                                                                         | Top               | Shared                                | - $\Delta$ Net BRET                   |                                       |                                 |                   |
|          | Effect of SR142948A on NT-induced activation of G $\alpha$ 13 | 3                                                              | 0 nM SR142948A                                                                                                                          | EC <sub>50</sub>  | 9.708e-009 (7.410e-009 to 1.272e-008) | M                                     |                                       |                                 |                   |
|          |                                                               |                                                                |                                                                                                                                         | Top               | 0.5207 (0.5068 to 0.5346)             | - $\Delta$ Net BRET                   |                                       |                                 |                   |
|          |                                                               |                                                                | 10 nM SR142948A                                                                                                                         | EC <sub>50</sub>  | 2.368e-008 (1.783e-008 to 3.144e-008) | M                                     |                                       |                                 |                   |
|          |                                                               |                                                                |                                                                                                                                         | Top               | Shared                                | - $\Delta$ Net BRET                   |                                       |                                 |                   |
|          |                                                               |                                                                | 100 nM SR142948A                                                                                                                        | EC <sub>50</sub>  | 6.666e-008 (5.066e-008 to 8.773e-008) | M                                     |                                       |                                 |                   |
|          |                                                               |                                                                |                                                                                                                                         | Top               | Shared                                | - $\Delta$ Net BRET                   |                                       |                                 |                   |
|          |                                                               |                                                                | 1 $\mu$ M SR142948A                                                                                                                     | EC <sub>50</sub>  | 4.201e-007 (3.163e-007 to 5.579e-007) | M                                     |                                       |                                 |                   |
|          |                                                               |                                                                |                                                                                                                                         | Top               | Shared                                | - $\Delta$ Net BRET                   |                                       |                                 |                   |
|          |                                                               |                                                                | 10 $\mu$ M SR142948A                                                                                                                    | EC <sub>50</sub>  | 2.224e-006 (1.679e-006 to 2.946e-006) | M                                     |                                       |                                 |                   |
|          |                                                               |                                                                |                                                                                                                                         | Top               | Shared                                | - $\Delta$ Net BRET                   |                                       |                                 |                   |
|          |                                                               |                                                                | 100 $\mu$ M SR142948A                                                                                                                   | EC <sub>50</sub>  | 8.843e-006 (6.719e-006 to 1.164e-005) | M                                     |                                       |                                 |                   |
|          |                                                               |                                                                |                                                                                                                                         | Top               | Shared                                | - $\Delta$ Net BRET                   |                                       |                                 |                   |
| <b>2</b> |                                                               | <b>E</b>                                                       | Effect of SR142948A on NT DRC EC <sub>50</sub> for combined G proteins, one-way ANOVA followed by Bonferroni multiple comparisons test. |                   |                                       |                                       |                                       |                                 |                   |
|          |                                                               |                                                                | F (5, 78) = 6.018, P<0.0001                                                                                                             |                   |                                       |                                       |                                       |                                 |                   |
|          |                                                               | *p<0.05, 100 $\mu$ M vs. Vehicle                               |                                                                                                                                         |                   |                                       |                                       |                                       |                                 |                   |
| <b>2</b> | <b>F</b>                                                      | Illustration                                                   |                                                                                                                                         |                   |                                       |                                       |                                       |                                 |                   |
| <b>2</b> | <b>G</b>                                                      | Illustration                                                   |                                                                                                                                         |                   |                                       |                                       |                                       |                                 |                   |
| <b>2</b> | <b>H</b>                                                      | Effect of SBI-553 on NT-induced $\beta$ -arrestin1 recruitment | 3                                                                                                                                       | 0 $\mu$ M SBI-553 | EC <sub>50</sub>                      | 8.366e-009 (5.880e-009 to 1.190e-008) | M                                     |                                 |                   |
|          |                                                               |                                                                |                                                                                                                                         |                   | Top                                   | 0.5022 (0.4762 to 0.5281)             | $\Delta$ Net BRET                     |                                 |                   |
|          |                                                               |                                                                |                                                                                                                                         |                   | Bottom                                | -0.008639 (-0.03099 to 0.01372)       | $\Delta$ Net BRET                     |                                 |                   |
|          |                                                               |                                                                |                                                                                                                                         |                   | 1 $\mu$ M SBI-553                     | EC <sub>50</sub>                      | 6.121e-009 (4.318e-009 to 8.679e-009) | M                               |                   |
|          |                                                               |                                                                |                                                                                                                                         |                   |                                       | Top                                   | 0.5590 (0.5324 to 0.5857)             | $\Delta$ Net BRET               |                   |
|          |                                                               |                                                                |                                                                                                                                         |                   |                                       | Bottom                                | 0.004868 (-0.01913 to 0.02886)        | $\Delta$ Net BRET               |                   |
|          |                                                               |                                                                |                                                                                                                                         |                   | 3 $\mu$ M SBI-553                     | EC <sub>50</sub>                      | 6.668e-009 (4.723e-009 to 9.415e-009) | M                               |                   |
|          |                                                               |                                                                |                                                                                                                                         |                   |                                       | Top                                   | 0.5651 (0.5396 to 0.5906)             | $\Delta$ Net BRET               |                   |
|          |                                                               |                                                                |                                                                                                                                         |                   |                                       | Bottom                                | 0.03620 (0.01354 to 0.05886)          | $\Delta$ Net BRET               |                   |
|          |                                                               |                                                                |                                                                                                                                         |                   | 10 $\mu$ M SBI-553                    | EC <sub>50</sub>                      | 7.938e-009 (4.962e-009 to 1.270e-008) | M                               |                   |
|          |                                                               |                                                                |                                                                                                                                         |                   |                                       | Top                                   | 0.5508 (0.5236 to 0.578)              | $\Delta$ Net BRET               |                   |
|          |                                                               |                                                                |                                                                                                                                         |                   |                                       | Bottom                                | 0.1461 (0.1225 to 0.1697)             | $\Delta$ Net BRET               |                   |
|          |                                                               |                                                                |                                                                                                                                         |                   | 30 $\mu$ M SBI-553                    | EC <sub>50</sub>                      | 9.307e-009 (3.649e-009 to 2.374e-008) | M                               |                   |
|          |                                                               |                                                                |                                                                                                                                         |                   |                                       | Top                                   | 0.5370 (0.5061 to 0.5678)             | $\Delta$ Net BRET               |                   |
|          |                                                               |                                                                |                                                                                                                                         | Bottom            |                                       | 0.3108 (0.2846 to 0.3370)             | $\Delta$ Net BRET                     |                                 |                   |
|          |                                                               |                                                                | Effect of SBI-553 on NT-induced $\beta$ -arrestin2 recruitment                                                                          | 3                 | 0 $\mu$ M SBI-553                     | EC <sub>50</sub>                      | 1.462e-008 (1.119e-008 to 1.911e-008) | M                               |                   |
|          |                                                               |                                                                |                                                                                                                                         |                   |                                       |                                       | Top                                   | 0.5629 (0.5404 to 0.5853)       | $\Delta$ Net BRET |
|          |                                                               |                                                                |                                                                                                                                         |                   |                                       |                                       | Bottom                                | -0.001865 (-0.01979 to 0.01606) | $\Delta$ Net BRET |
|          |                                                               | 1 $\mu$ M SBI-553                                              |                                                                                                                                         | EC <sub>50</sub>  | 1.381e-008 (1.016e-008 to 1.878e-008) | M                                     |                                       |                                 |                   |

|   |                                                                |               |                  |                                       |             |
|---|----------------------------------------------------------------|---------------|------------------|---------------------------------------|-------------|
|   |                                                                |               | Top              | 0.6212 (0.5937 to 0.6487)             | Δ Net BRET  |
|   |                                                                |               | Bottom           | 0.01863 (-0.003501 to 0.04076)        | Δ Net BRET  |
|   |                                                                | 3 μM SBI-553  | EC <sub>50</sub> | 1.486e-008 (1.036e-008 to 2.130e-008) | M           |
|   |                                                                |               | Top              | 0.6242 (0.5960 to 0.6523)             | Δ Net BRET  |
|   |                                                                |               | Bottom           | 0.09722 (0.07477 to 0.1197)           | Δ Net BRET  |
|   |                                                                | 10 μM SBI-553 | EC <sub>50</sub> | 2.135e-008 (1.248e-008 to 3.651e-008) | M           |
|   |                                                                |               | Top              | 0.6198 (0.5939 to 0.6456)             | Δ Net BRET  |
|   |                                                                |               | Bottom           | 0.2960 (0.2766 to 0.3154)             | Δ Net BRET  |
|   |                                                                | 30 μM SBI-553 | EC <sub>50</sub> | 2.337e-008 (9.356e-009 to 5.837e-008) | M           |
|   |                                                                |               | Top              | 0.6376 (0.6188 to 0.6564)             | Δ Net BRET  |
|   |                                                                |               | Bottom           | 0.4998 (0.4859 to 0.5137)             | Δ Net BRET  |
| I | Effect of SBI-553 on NT-induced activation of G <sub>αq</sub>  | 0 μM SBI-553  | EC <sub>50</sub> | 2.792e-009 (1.935e-009 to 4.028e-009) | M           |
|   |                                                                |               | Top              | 0.3051 (0.2929 to 0.3174)             | -Δ Net BRET |
|   |                                                                |               | Bottom           | -0.004371 (-0.01680 to 0.008062)      | -Δ Net BRET |
|   |                                                                | 1 μM SBI-553  | EC <sub>50</sub> | 1.784e-008 (7.137e-009 to 4.458e-008) | M           |
|   |                                                                |               | Top              | 0.1883 (0.1634 to 0.2132)             | -Δ Net BRET |
|   |                                                                |               | Bottom           | 0.004988 (-0.01432 to 0.02429)        | -Δ Net BRET |
|   |                                                                | 3 μM SBI-553  | EC <sub>50</sub> | 2.444e-008 (5.071e-009 to 1.178e-007) | M           |
|   |                                                                |               | Top              | 0.09894 (-0.001856 to 0.03925)        | -Δ Net BRET |
|   |                                                                |               | Bottom           | -0.007306 (-0.02556 to 0.01095)       | -Δ Net BRET |
|   |                                                                | 10 μM SBI-553 | EC <sub>50</sub> | 3.279e-008 (2.555e-010 to 4.210e-006) | M           |
|   |                                                                |               | Top              | 0.01870 (-0.001856 to 0.03925)        | -Δ Net BRET |
|   |                                                                |               | Bottom           | -0.009091 (-0.02332 to 0.005141)      | -Δ Net BRET |
|   |                                                                | 30 μM SBI-553 | EC <sub>50</sub> | 5.053e-007 (5.776e-018 to 44201)      | M           |
|   |                                                                |               | Top              | 0.004370 (-0.01697 to 0.02571)        | -Δ Net BRET |
|   |                                                                |               | Bottom           | 0.0004696 (-0.007560 to 0.008499)     | -Δ Net BRET |
|   | Effect of SBI-553 on NT-induced activation of G <sub>α11</sub> | 0 μM SBI-553  | EC <sub>50</sub> | 3.669e-009 (2.549e-009 to 5.281e-009) | M           |
|   |                                                                |               | Top              | 0.2685 (0.2561 to 0.2809)             | -Δ Net BRET |
|   |                                                                |               | Bottom           | 0.001133 (-0.01097 to 0.01323)        | -Δ Net BRET |
|   |                                                                | 1 μM SBI-553  | EC <sub>50</sub> | 9.765e-009 (5.738e-009 to 1.662e-008) | M           |
|   |                                                                |               | Top              | 0.2327 (0.2136 to 0.2517)             | -Δ Net BRET |
|   |                                                                |               | Bottom           | -0.01223 (-0.02830 to 0.003844)       | -Δ Net BRET |
|   |                                                                | 3 μM SBI-553  | EC <sub>50</sub> | 2.030e-008 (1.156e-008 to 3.566e-008) | M           |
|   |                                                                |               | Top              | 0.2067 (0.1886 to 0.2247)             | -Δ Net BRET |
|   |                                                                |               | Bottom           | -0.009058 (-0.02274 to 0.004621)      | -Δ Net BRET |
|   |                                                                | 10 μM SBI-553 | EC <sub>50</sub> | 2.774e-008 (1.236e-008 to 6.229e-008) | M           |
|   |                                                                |               | Top              | 0.1197 (0.1038 to 0.1355)             | -Δ Net BRET |
|   |                                                                |               | Bottom           | -0.01084 (-0.02217 to 0.0004920)      | -Δ Net BRET |
|   |                                                                | 30 μM SBI-553 | EC <sub>50</sub> | 2.705e-008 (2.445e-009 to 2.991e-007) | M           |
|   |                                                                |               | Top              | 0.03650 (0.01804 to 0.05496)          | -Δ Net BRET |

|                                                                 |                  |                                       |                                       |                                       |             |
|-----------------------------------------------------------------|------------------|---------------------------------------|---------------------------------------|---------------------------------------|-------------|
|                                                                 |                  |                                       | Bottom                                | -0.01476 (-0.02803 to -0.001487)      | -Δ Net BRET |
| Effect of SBI-553 on NT-induced activation of G <sub>α</sub> 15 | 3                | 0 μM SBI-553                          | EC <sub>50</sub>                      | 6.933e-009 (3.610e-009 to 1.331e-008) | M           |
|                                                                 |                  |                                       | Top                                   | 0.1293 (0.1185 to 0.1400)             | -Δ Net BRET |
|                                                                 |                  |                                       | Bottom                                | -0.002762 (-0.01209 to 0.006568)      | -Δ Net BRET |
|                                                                 | 1 μM SBI-553     | EC <sub>50</sub>                      | 1.307e-008 (1.554e-009 to 1.100e-007) | M                                     |             |
|                                                                 |                  | Top                                   | 0.08373 (0.06876 to 0.09870)          | -Δ Net BRET                           |             |
|                                                                 |                  | Bottom                                | 0.03628 (0.02413 to 0.04844)          | -Δ Net BRET                           |             |
|                                                                 | 3 μM SBI-553     | EC <sub>50</sub>                      | 2.227e-009 (8.828e-011 to 5.616e-008) | M                                     |             |
|                                                                 |                  | Top                                   | 0.08597 (0.07606 to 0.09588)          | -Δ Net BRET                           |             |
|                                                                 |                  | Bottom                                | 0.06113 (0.05062 to 0.07165)          | -Δ Net BRET                           |             |
|                                                                 | 10 μM SBI-553    | EC <sub>50</sub>                      | 5.569e-008 (2.899e-009 to 1.070e-006) | M                                     |             |
|                                                                 |                  | Top                                   | 0.07667 (0.06718 to 0.08615)          | -Δ Net BRET                           |             |
|                                                                 |                  | Bottom                                | 0.09601 (0.09005 to 0.1020)           | -Δ Net BRET                           |             |
| 30 μM SBI-553                                                   | EC <sub>50</sub> | 4.181e-008 (1.701e-008 to 1.028e-007) | M                                     |                                       |             |
|                                                                 | Top              | 0.05093 (0.04292 to 0.05895)          | -Δ Net BRET                           |                                       |             |
|                                                                 | Bottom           | 0.1075 (0.1022 to 0.1128)             | -Δ Net BRET                           |                                       |             |
| Effect of SBI-553 on NT-induced activation of G <sub>α</sub> i1 | 3                | 0 μM SBI-553                          | EC <sub>50</sub>                      | 4.989e-009 (2.837e-009 to 8.772e-009) | M           |
|                                                                 |                  |                                       | Top                                   | 0.2681 (0.2486 to 0.2876)             | -Δ Net BRET |
|                                                                 |                  |                                       | Bottom                                | 0.009071 (-0.009004 to 0.02715)       | -Δ Net BRET |
|                                                                 | 1 μM SBI-553     | EC <sub>50</sub>                      | 6.738e-009 (4.318e-009 to 1.052e-008) | M                                     |             |
|                                                                 |                  | Top                                   | 0.2282 (0.2139 to 0.2426)             | -Δ Net BRET                           |             |
|                                                                 |                  | Bottom                                | -0.001507 (-0.01421 to 0.01119)       | -Δ Net BRET                           |             |
|                                                                 | 3 μM SBI-553     | EC <sub>50</sub>                      | 6.691e-009 (4.546e-009 to 9.848e-009) | M                                     |             |
|                                                                 |                  | Top                                   | 0.2242 (0.2120 to 0.2364)             | -Δ Net BRET                           |             |
|                                                                 |                  | Bottom                                | -0.0009451 (-0.01175 to 0.009864)     | -Δ Net BRET                           |             |
|                                                                 | 10 μM SBI-553    | EC <sub>50</sub>                      | 5.301e-009 (3.713e-009 to 7.568e-009) | M                                     |             |
|                                                                 |                  | Top                                   | 0.2205 (0.2106 to 0.2305)             | -Δ Net BRET                           |             |
|                                                                 |                  | Bottom                                | 0.01236 (0.003189 to 0.02153)         | -Δ Net BRET                           |             |
| 30 μM SBI-553                                                   | EC <sub>50</sub> | 7.585e-009 (4.907e-009 to 1.172e-008) | M                                     |                                       |             |
|                                                                 | Top              | 0.2159 (0.2055 to 0.2264)             | -Δ Net BRET                           |                                       |             |
|                                                                 | Bottom           | 0.04686 (0.03771 to 0.05601)          | -Δ Net BRET                           |                                       |             |
| Effect of SBI-553 on NT-induced activation of G <sub>α</sub> i2 | 3                | 0 μM SBI-553                          | EC <sub>50</sub>                      | 8.190e-009 (4.390e-009 to 1.528e-008) | M           |
|                                                                 |                  |                                       | Top                                   | 0.2543 (0.2317 to 0.2769)             | -Δ Net BRET |
|                                                                 |                  |                                       | Bottom                                | 0.002192 (-0.01732 to 0.02145)        | -Δ Net BRET |
|                                                                 | 1 μM SBI-553     | EC <sub>50</sub>                      | 1.932e-008 (9.379e-009 to 3.982e-008) | M                                     |             |
|                                                                 |                  | Top                                   | 0.2191 (0.1952 to 0.2429)             | -Δ Net BRET                           |             |
|                                                                 |                  | Bottom                                | -0.002859 (-0.02090 to 0.01497)       | -Δ Net BRET                           |             |
|                                                                 | 3 μM SBI-553     | EC <sub>50</sub>                      | 1.958e-008 (9.322e-009 to 4.113e-008) | M                                     |             |
|                                                                 |                  | Top                                   | 0.2284 (0.2018 to 0.2550)             | -Δ Net BRET                           |             |



|                                                                 |               |                              |                                       |                                       |             |
|-----------------------------------------------------------------|---------------|------------------------------|---------------------------------------|---------------------------------------|-------------|
|                                                                 |               |                              | Bottom                                | -0.01298 (-0.03320 to 0.006989)       | -Δ Net BRET |
|                                                                 |               | 10 μM SBI-553                | EC <sub>50</sub>                      | 1.756e-008 (8.656e-009 to 3.563e-008) | M           |
|                                                                 |               |                              | Top                                   | 0.2167 (0.1928 to 0.2406)             | -Δ Net BRET |
|                                                                 |               | 30 μM SBI-553                | Bottom                                | -0.01105 (-0.02953 to 0.007208)       | -Δ Net BRET |
|                                                                 |               |                              | EC <sub>50</sub>                      | 1.437e-008 (6.956e-009 to 3.018e-008) | M           |
|                                                                 |               |                              | Top                                   | 0.1946 (0.1770 to 0.2129)             | -Δ Net BRET |
|                                                                 |               |                              | Bottom                                | 0.03008 (0.01562 to 0.04435)          | -Δ Net BRET |
| Effect of SBI-553 on NT-induced activation of G <sub>q</sub> i3 | 3             | 0 μM SBI-553                 | EC <sub>50</sub>                      | 2.789e-008 (2.029e-008 to 3.836e-008) | M           |
|                                                                 |               |                              | Top                                   | 0.4199 (0.3996 to 0.4402)             | -Δ Net BRET |
|                                                                 |               |                              | Bottom                                | -0.004657 (-0.01917 to 0.009854)      | -Δ Net BRET |
|                                                                 |               | 1 μM SBI-553                 | EC <sub>50</sub>                      | 2.659e-008 (1.699e-008 to 4.159e-008) | M           |
|                                                                 | Top           |                              | 0.2034 (0.1890 to 0.2177)             | -Δ Net BRET                           |             |
|                                                                 | Bottom        |                              | -0.01096 (-0.02132 to -0.0006084)     | -Δ Net BRET                           |             |
|                                                                 |               | 3 μM SBI-553                 | EC <sub>50</sub>                      | 2.785e-008 (1.605e-008 to 4.832e-008) | M           |
|                                                                 | Top           |                              | 0.1906 (0.1742 to 0.2070)             | -Δ Net BRET                           |             |
|                                                                 | Bottom        |                              | -0.008003 (-0.01975 to 0.003740)      | -Δ Net BRET                           |             |
|                                                                 |               | 10 μM SBI-553                | EC <sub>50</sub>                      | 2.098e-008 (1.148e-008 to 3.832e-008) | M           |
|                                                                 | Top           |                              | 0.1827 (0.1664 to 0.1991)             | -Δ Net BRET                           |             |
|                                                                 | Bottom        |                              | 6.552e-005 (-0.01226 to 0.01239)      | -Δ Net BRET                           |             |
|                                                                 | 30 μM SBI-553 | EC <sub>50</sub>             | 2.105e-008 (9.406e-009 to 4.712e-008) | M                                     |             |
| Top                                                             |               | 0.1966 (0.1776 to 0.2156)    | -Δ Net BRET                           |                                       |             |
| Bottom                                                          |               | 0.03771 (0.02339 to 0.05203) | -Δ Net BRET                           |                                       |             |
| Effect of SBI-553 on NT-induced activation of G <sub>q</sub> oA | 3             | 0 μM SBI-553                 | EC <sub>50</sub>                      | 1.315e-008 (9.775e-009 to 1.769e-008) | M           |
|                                                                 |               |                              | Top                                   | 0.2966 (0.2833 to 0.3099)             | -Δ Net BRET |
|                                                                 |               |                              | Bottom                                | -0.006282 (-0.01708 to 0.004518)      | -Δ Net BRET |
|                                                                 |               | 1 μM SBI-553                 | EC <sub>50</sub>                      | 1.450e-008 (1.091e-008 to 1.927e-008) | M           |
|                                                                 | Top           |                              | 0.2735 (0.2622 to 0.2849)             | -Δ Net BRET                           |             |
|                                                                 | Bottom        |                              | 0.004023 (-0.005073 to 0.01312)       | -Δ Net BRET                           |             |
|                                                                 |               | 3 μM SBI-553                 | EC <sub>50</sub>                      | 1.252e-008 (9.185e-009 to 1.706e-008) | M           |
|                                                                 | Top           |                              | 0.2826 (0.2704 to 0.2947)             | -Δ Net BRET                           |             |
|                                                                 | Bottom        |                              | 0.01642 (0.006461 to 0.02638)         | -Δ Net BRET                           |             |
|                                                                 |               | 10 μM SBI-553                | EC <sub>50</sub>                      | 1.468e-008 (9.237e-009 to 2.332e-008) | M           |
|                                                                 | Top           |                              | 0.2868 (0.2716 to 0.3021)             | -Δ Net BRET                           |             |
|                                                                 | Bottom        |                              | 0.06481 (0.05263 to 0.07700)          | -Δ Net BRET                           |             |
|                                                                 | 30 μM SBI-553 | EC <sub>50</sub>             | 1.034e-008 (6.084e-009 to 1.758e-008) | M                                     |             |
| Top                                                             |               | 0.2786 (0.2669 to 0.2904)    | -Δ Net BRET                           |                                       |             |
| Bottom                                                          |               | 0.1174 (0.1074 to 0.1273)    | -Δ Net BRET                           |                                       |             |
| Effect of SBI-553 on NT-                                        | 3             | 0 μM SBI-553                 | EC <sub>50</sub>                      | 3.583e-008 (2.257e-008 to 5.687e-008) | M           |
|                                                                 |               |                              | Top                                   | 0.2827 (0.2629 to 0.3025)             | -Δ Net BRET |

|                                                                        |                  |                                       |                                       |             |
|------------------------------------------------------------------------|------------------|---------------------------------------|---------------------------------------|-------------|
| induced activation of G <sub>α</sub> oB                                | 1 μM SBI-553     | Bottom                                | 0.004527 (-0.008947 to 0.01800)       | -Δ Net BRET |
|                                                                        |                  | EC <sub>50</sub>                      | 3.914e-008 (2.389e-008 to 6.412e-008) | M           |
|                                                                        |                  | Top                                   | 0.2768 (0.2560 to 0.2976)             | -Δ Net BRET |
|                                                                        | 3 μM SBI-553     | Bottom                                | 0.006857 (-0.007049 to 0.02076)       | -Δ Net BRET |
|                                                                        |                  | EC <sub>50</sub>                      | 2.777e-008 (1.894e-008 to 4.072e-008) | M           |
|                                                                        |                  | Top                                   | 0.2794 (0.2642 to 0.2947)             | -Δ Net BRET |
|                                                                        | 10 μM SBI-553    | Bottom                                | 0.01430 (0.003404 to 0.02520)         | -Δ Net BRET |
|                                                                        |                  | EC <sub>50</sub>                      | 2.555e-008 (1.598e-008 to 4.084e-008) | M           |
|                                                                        |                  | Top                                   | 0.2828 (0.2658 to 0.2998)             | -Δ Net BRET |
|                                                                        | 30 μM SBI-553    | Bottom                                | 0.04076 (0.02844 to 0.05309)          | -Δ Net BRET |
|                                                                        |                  | EC <sub>50</sub>                      | 1.785e-008 (9.400e-009 to 3.389e-008) | M           |
|                                                                        |                  | Top                                   | 0.2718 (0.2564 to 0.2872)             | -Δ Net BRET |
| Effect of SBI-553 on NT-induced activation of G <sub>α</sub> z         | 0 μM SBI-553     | Bottom                                | 0.1009 (0.08906 to 0.1128)            | -Δ Net BRET |
|                                                                        |                  | EC <sub>50</sub>                      | 6.727e-009 (3.885e-009 to 1.165e-008) | M           |
|                                                                        |                  | Top                                   | 0.2871 (0.2658 to 0.3085)             | -Δ Net BRET |
|                                                                        | 1 μM SBI-553     | Bottom                                | 0.009686 (-0.009238 to 0.02861)       | -Δ Net BRET |
|                                                                        |                  | EC <sub>50</sub>                      | 1.467e-008 (7.816e-009 to 2.752e-008) | M           |
|                                                                        |                  | Top                                   | 0.1972 (0.1798 to 0.2147)             | -Δ Net BRET |
|                                                                        | 3 μM SBI-553     | Bottom                                | 0.01057 (-0.003348 to 0.02450)        | -Δ Net BRET |
|                                                                        |                  | EC <sub>50</sub>                      | 1.795e-008 (7.919e-009 to 4.068e-008) | M           |
|                                                                        |                  | Top                                   | 0.1527 (0.1358 to 0.1696)             | -Δ Net BRET |
|                                                                        | 10 μM SBI-553    | Bottom                                | 0.01348 (0.0004051 to 0.02656)        | -Δ Net BRET |
|                                                                        |                  | EC <sub>50</sub>                      | 1.341e-008 (5.128e-009 to 3.508e-008) | M           |
|                                                                        |                  | Top                                   | 0.1145 (0.09960 to 0.1295)            | -Δ Net BRET |
| 30 μM SBI-553                                                          | Bottom           | 0.009683 (-0.002410 to 0.02177)       | -Δ Net BRET                           |             |
|                                                                        | EC <sub>50</sub> | 1.117e-008 (3.360e-009 to 3.716e-008) | M                                     |             |
|                                                                        | Top              | 0.08938 (0.07731 to 0.1014)           | -Δ Net BRET                           |             |
| Effect of SBI-553 on NT-induced activation of G <sub>α</sub> gustducin | 0 μM SBI-553     | Bottom                                | 0.02120 (0.01119 to 0.03122)          | -Δ Net BRET |
|                                                                        |                  | EC <sub>50</sub>                      | 1.265e-008 (4.984e-009 to 3.212e-008) | M           |
|                                                                        |                  | Top                                   | 0.07106 (0.06256 to 0.07956)          | -Δ Net BRET |
|                                                                        | 1 μM SBI-553     | Bottom                                | 0.009434 (0.002500 to 0.01637)        | -Δ Net BRET |
|                                                                        |                  | EC <sub>50</sub>                      | 4.670e-008 (5.463e-009 to 3.992e-007) | M           |
|                                                                        |                  | Top                                   | 0.05056 (0.03826 to 0.06286)          | -Δ Net BRET |
|                                                                        | 3 μM SBI-553     | Bottom                                | 0.01486 (0.006894 to 0.02283)         | -Δ Net BRET |
|                                                                        |                  | EC <sub>50</sub>                      | 2.364e-008 (4.773e-009 to 1.171e-007) | M           |
|                                                                        |                  | Top                                   | 0.05660 (0.04559 to 0.06761)          | -Δ Net BRET |
|                                                                        | 10 μM SBI-553    | Bottom                                | 0.01039 (0.002273 to 0.01851)         | -Δ Net BRET |
|                                                                        |                  | EC <sub>50</sub>                      | 4.065e-008 (7.725e-009 to 2.139e-007) | M           |
|                                                                        |                  | Top                                   | 0.06659 (0.05620 to 0.07699)          | -Δ Net BRET |

|                                                                 |               |                                                                                                                                                                                                                                                                |                                       |                                       |             |
|-----------------------------------------------------------------|---------------|----------------------------------------------------------------------------------------------------------------------------------------------------------------------------------------------------------------------------------------------------------------|---------------------------------------|---------------------------------------|-------------|
|                                                                 |               |                                                                                                                                                                                                                                                                | Bottom                                | 0.02669 (0.01978 to 0.03359)          | -Δ Net BRET |
|                                                                 |               | 30 μM SBI-553                                                                                                                                                                                                                                                  | EC <sub>50</sub>                      | 1.090e-008 (2.185e-009 to 5.434e-008) | M           |
|                                                                 |               |                                                                                                                                                                                                                                                                | Top                                   | 0.07036 (0.06389 to 0.07684)          | -Δ Net BRET |
|                                                                 |               |                                                                                                                                                                                                                                                                | Bottom                                | 0.04299 (0.03760 to 0.04838)          | -Δ Net BRET |
| Effect of SBI-553 on NT-induced activation of G <sub>α</sub> 12 | 3             | 0 μM SBI-553                                                                                                                                                                                                                                                   | EC <sub>50</sub>                      | 1.885e-008 (1.036e-008 to 3.429e-008) | M           |
|                                                                 |               |                                                                                                                                                                                                                                                                | Top                                   | 0.3125 (0.2855 to 0.3395)             | -Δ Net BRET |
|                                                                 |               |                                                                                                                                                                                                                                                                | Bottom                                | 0.008787 (-0.01191 to 0.02949)        | -Δ Net BRET |
|                                                                 |               | 1 μM SBI-553                                                                                                                                                                                                                                                   | EC <sub>50</sub>                      | 7.868e-009 (4.457e-009 to 1.389e-008) | M           |
|                                                                 | Top           |                                                                                                                                                                                                                                                                | 0.3103 (0.2864 to 0.3341)             | -Δ Net BRET                           |             |
|                                                                 | Bottom        |                                                                                                                                                                                                                                                                | 0.01697 (-0.003742 to 0.03768)        | -Δ Net BRET                           |             |
|                                                                 |               | 3 μM SBI-553                                                                                                                                                                                                                                                   | EC <sub>50</sub>                      | 5.083e-009 (2.636e-009 to 9.805e-009) | M           |
|                                                                 | Top           |                                                                                                                                                                                                                                                                | 0.3101 (0.2869 to 0.3334)             | -Δ Net BRET                           |             |
|                                                                 | Bottom        |                                                                                                                                                                                                                                                                | 0.04556 (0.02407 to 0.06706)          | -Δ Net BRET                           |             |
|                                                                 |               | 10 μM SBI-553                                                                                                                                                                                                                                                  | EC <sub>50</sub>                      | 7.104e-009 (2.718e-009 to 1.856e-008) | M           |
|                                                                 | Top           |                                                                                                                                                                                                                                                                | 0.3113 (0.2817 to 0.3409)             | -Δ Net BRET                           |             |
|                                                                 | Bottom        |                                                                                                                                                                                                                                                                | 0.09278 (0.06669 to 0.1189)           | -Δ Net BRET                           |             |
|                                                                 | 30 μM SBI-553 | EC <sub>50</sub>                                                                                                                                                                                                                                               | 7.633e-009 (1.801e-009 to 3.236e-008) | M                                     |             |
| Top                                                             |               | 0.3011 (0.2741 to 0.3280)                                                                                                                                                                                                                                      | -Δ Net BRET                           |                                       |             |
| Bottom                                                          |               | 0.1700 (0.1465 to 0.1935)                                                                                                                                                                                                                                      | -Δ Net BRET                           |                                       |             |
| Effect of SBI-553 on NT-induced activation of G <sub>α</sub> 13 | 3             | 0 μM SBI-553                                                                                                                                                                                                                                                   | EC <sub>50</sub>                      | 1.295e-008 (8.876e-009 to 1.888e-008) | M           |
|                                                                 |               |                                                                                                                                                                                                                                                                | Top                                   | 0.5175 (0.4884 to 0.5467)             | -Δ Net BRET |
|                                                                 |               |                                                                                                                                                                                                                                                                | Bottom                                | -0.004046 (-0.02776 to 0.01966)       | -Δ Net BRET |
|                                                                 |               | 1 μM SBI-553                                                                                                                                                                                                                                                   | EC <sub>50</sub>                      | 1.009e-008 (6.561e-009 to 1.552e-008) | M           |
|                                                                 | Top           |                                                                                                                                                                                                                                                                | 0.4853 (0.4554 to 0.5152)             | -Δ Net BRET                           |             |
|                                                                 | Bottom        |                                                                                                                                                                                                                                                                | 0.01054 (-0.01463 to 0.03571)         | -Δ Net BRET                           |             |
|                                                                 |               | 3 μM SBI-553                                                                                                                                                                                                                                                   | EC <sub>50</sub>                      | 8.475e-009 (5.894e-009 to 1.218e-008) | M           |
|                                                                 | Top           |                                                                                                                                                                                                                                                                | 0.4924 (0.4687 to 0.5162)             | -Δ Net BRET                           |             |
|                                                                 | Bottom        |                                                                                                                                                                                                                                                                | 0.03886 (0.01842 to 0.05930)          | -Δ Net BRET                           |             |
|                                                                 |               | 10 μM SBI-553                                                                                                                                                                                                                                                  | EC <sub>50</sub>                      | 6.319e-009 (4.291e-009 to 9.304e-009) | M           |
|                                                                 | Top           |                                                                                                                                                                                                                                                                | 0.4896 (0.4674 to 0.5118)             | -Δ Net BRET                           |             |
|                                                                 | Bottom        |                                                                                                                                                                                                                                                                | 0.07522 (0.05532 to 0.09512)          | -Δ Net BRET                           |             |
|                                                                 | 30 μM SBI-553 | EC <sub>50</sub>                                                                                                                                                                                                                                               | 3.436e-009 (1.730e-009 to 6.825e-009) | M                                     |             |
| Top                                                             |               | 0.4703 (0.4448 to 0.4958)                                                                                                                                                                                                                                      | -Δ Net BRET                           |                                       |             |
| Bottom                                                          |               | 0.1763 (0.1512 to 0.2015)                                                                                                                                                                                                                                      | -Δ Net BRET                           |                                       |             |
| <b>2</b>                                                        | <b>J</b>      | Effect of SBI-553 on NT DRC EC <sub>50</sub> for combined G proteins, one-way ANOVA followed by Bonferroni multiple comparisons test.                                                                                                                          |                                       |                                       |             |
|                                                                 |               | F (2.357, 22.39) = 0.9654, P = 0.4088                                                                                                                                                                                                                          |                                       |                                       |             |
|                                                                 |               | p<0.5 (n.s.), 30 μM vs. Vehicle                                                                                                                                                                                                                                |                                       |                                       |             |
| <b>2</b>                                                        | <b>K</b>      | Effect of SBI-553 on NT potency. *indicates G proteins for which the NT EC <sub>50</sub> vs. NT + SBI-553 EC <sub>50</sub> have non-overlapping 95% confidence intervals (CI). SBI-553 dose selected was the highest for which a sigmoidal curve could be fit. |                                       |                                       |             |
|                                                                 |               | NT                                                                                                                                                                                                                                                             |                                       | NT + SBI-553                          |             |

|          |          | Mean (M)                                                                                                               | 95% CI (M) | Mean (M)               | 95% CI (M)                            | Fold-change                           |               |
|----------|----------|------------------------------------------------------------------------------------------------------------------------|------------|------------------------|---------------------------------------|---------------------------------------|---------------|
|          |          | G13                                                                                                                    | 1.3E-08    | 8.876e-09 to 1.888e-08 | 3.436E-09                             | 1.730e-09 to 6.825e-09                | 3.768917346   |
|          |          | G12                                                                                                                    | 1.89E-08   | 1.036e-08 to 3.429e-08 | 7.63E-09                              | 1.801e-09 to 3.236e-08                | 2.469540155   |
|          |          | Gz                                                                                                                     | 6.73E-09   | 3.885e-09 to 1.165e-08 | 1.12E-08                              | 3.360e-09 to 3.716e-08                | 0.602238138   |
|          |          | Gg                                                                                                                     | 1.27E-08   | 4.984e-09 to 3.212e-08 | 1.09E-08                              | 2.185e-09 to 5.434e-08                | 1.160550459   |
|          |          | GoB                                                                                                                    | 3.58E-08   | 2.257e-08 to 5.687e-08 | 2.371E-08                             | 1.255e-08 to 4.479e-08                | 1.511176719   |
|          |          | GoA                                                                                                                    | 1.32E-08   | 9.775e-09 to 1.769e-08 | 1.385E-08                             | 8.069e-09 to 2.377e-08                | 0.949458484   |
|          |          | Gi3                                                                                                                    | 2.79E-08   | 2.029e-08 to 3.836e-08 | 2.105E-08                             | 9.405e-09 to 4.711e-08                | 1.324940618   |
|          |          | Gi2                                                                                                                    | 8.19E-09   | 4.459e-09 to 1.480e-08 | 1.437E-08                             | 6.956e-09 to 3.018e-08                | 0.56993737    |
|          |          | Gi1                                                                                                                    | 4.99E-09   | 2.837e-09 to 8.772e-09 | 7.585E-09                             | 4.907e-09 to 1.172e-08                | 0.65774555    |
|          |          | G15                                                                                                                    | 6.93E-09   | 3.610e-09 to 1.331e-08 | 4.181E-08                             | 1.701e-08 to 1.028e-07                | 0.165821574   |
|          |          | G11                                                                                                                    | 3.67E-09   | 2.549e-09 to 5.281e-09 | 2.705E-08                             | 1.236e-08 to 6.229e-08                | 0.135637708   |
|          |          | Gq                                                                                                                     | 2.79E-09   | 1.935e-09 to 4.028e-09 | 3.279E-08                             | 2.555e-08 to 4.210e-06                | 0.085147911   |
| <b>2</b> | <b>L</b> | Radar plots summarize the extent of activation of each transducer in the presence NT, SBI-553, and both NT and SBI-553 |            |                        |                                       |                                       |               |
| <b>2</b> | <b>M</b> | Effect of SR142948A vs. SBI-553 on NT-induced G protein activation by TGF $\alpha$ Shedding - G $\alpha$ q             | 4          | SR142948A              | IC <sub>50</sub>                      | 1.757e-007 (1.478e-007 to 2.084e-007) | M             |
|          |          |                                                                                                                        |            | Bottom                 | -0.3333 (-1.539 to 0.8547)            | % AP Shedding                         |               |
|          |          |                                                                                                                        | SBI-553    | IC <sub>50</sub>       | 4.135e-007 (ND)                       | M                                     |               |
|          |          |                                                                                                                        |            | Bottom                 | 2.081 (0.1138 to 3.679)               | % AP Shedding                         |               |
|          |          | Effect of SR142948A vs. SBI-553 on NT-induced G protein activation by TGF $\alpha$ Shedding - G $\alpha$ i1/2          | 3          | SR142948A              | IC <sub>50</sub>                      | 1.843e-008 (1.244e-008 to 2.712e-008) | M             |
|          |          |                                                                                                                        |            |                        | Bottom                                | 0.2383 (-0.7989 to 1.103)             | % AP Shedding |
|          |          |                                                                                                                        | SBI-553    | IC <sub>50</sub>       | 4.411e-008 (5.210e-009 to 1.033e-006) | M                                     |               |
|          |          |                                                                                                                        |            | Bottom                 | 14.53 (12.66 to 16.75)                | % AP Shedding                         |               |
|          |          | Effect of SR142948A vs. SBI-553 on NT-induced G protein activation by TGF $\alpha$ Shedding - G $\alpha$ o             | 3          | SR142948A              | IC <sub>50</sub>                      | 1.708e-007 (1.465e-007 to 1.981e-007) | M             |
|          |          |                                                                                                                        |            |                        | Bottom                                | -1.409 (-2.142 to -0.6838)            | % AP Shedding |
|          |          |                                                                                                                        | SBI-553    | IC <sub>50</sub>       | 1.426e-007 (8.519e-008 to 2.893e-007) | M                                     |               |
|          |          |                                                                                                                        |            | Bottom                 | 10.95 (9.954 to 11.79)                | % AP Shedding                         |               |
|          |          | Effect of SR142948A vs. SBI-553 on NT-induced G protein activation by TGF $\alpha$ Shedding - G $\alpha$ 12            | 3          | SR142948A              | IC <sub>50</sub>                      | 1.175e-008 (7.754e-009 to 1.737e-008) | M             |
|          |          |                                                                                                                        |            |                        | Bottom                                | 1.058 (0.2823 to 1.806)               | % AP Shedding |
|          |          |                                                                                                                        | SBI-553    | IC <sub>50</sub>       | 3.773e-009 (1.102e-012 to 1.292e-005) | M                                     |               |
|          |          |                                                                                                                        |            | Bottom                 | 13.80 (8.486 to 19.10)                | % AP Shedding                         |               |
| <b>2</b> | <b>N</b> | Illustration                                                                                                           |            |                        |                                       |                                       |               |

CI, confidence interval; NT, neurotensin; SBI-553, SBI-0654553; EC<sub>50</sub>, half-maximal effective concentration; ND, not defined

**Table S3. Curve parameters and statistical comparisons presented in Figure 3 – Supporting Figure 3.**

| Fig                                                                                | Panel                                                                             | Description                                                                               | N                                     | Condition                             | Parameter                             | Mean (95% CI)                         | Units      |
|------------------------------------------------------------------------------------|-----------------------------------------------------------------------------------|-------------------------------------------------------------------------------------------|---------------------------------------|---------------------------------------|---------------------------------------|---------------------------------------|------------|
| 3                                                                                  | A                                                                                 | Illustration                                                                              |                                       |                                       |                                       |                                       |            |
| 3                                                                                  | B                                                                                 | Effect of SR142948A vs. SBI-553 on NT-induced recruitment of mini G <sub>αq</sub>         | 3                                     | SBI-553                               | IC <sub>50</sub>                      | 1.944e-008 (1.689e-008 to 2.237e-008) | M          |
|                                                                                    |                                                                                   |                                                                                           |                                       |                                       | Top                                   | 0.01585 (0.01360 to 0.01808)          | Δ Net BRET |
|                                                                                    |                                                                                   |                                                                                           |                                       |                                       | Bottom                                | 0.1404 (0.1368 to 0.1440)             | Δ Net BRET |
|                                                                                    |                                                                                   |                                                                                           | SR142948A                             | IC <sub>50</sub>                      | 3.786e-008 (2.734e-008 to 5.199e-008) | M                                     |            |
|                                                                                    |                                                                                   |                                                                                           |                                       | Top                                   | 0.005873 (0.0007201 to 0.01097)       | Δ Net BRET                            |            |
|                                                                                    |                                                                                   |                                                                                           |                                       | Bottom                                | 0.1410 (0.1361 to 0.1460)             | Δ Net BRET                            |            |
|                                                                                    |                                                                                   | Effect of SR142948A vs. SBI-553 on NT-induced recruitment of mini G <sub>αi1</sub>        | 3                                     | SBI-553                               | IC <sub>50</sub>                      | 6.170e-009 (4.935e-009 to 7.711e-009) | M          |
|                                                                                    |                                                                                   |                                                                                           |                                       |                                       | Top                                   | 0.04704 (0.04563 to 0.04844)          | Δ Net BRET |
|                                                                                    |                                                                                   |                                                                                           |                                       |                                       | Bottom                                | 0.1037 (0.1009 to 0.1066)             | Δ Net BRET |
|                                                                                    |                                                                                   |                                                                                           | SR142948A                             | IC <sub>50</sub>                      | 1.492e-008 (1.116e-008 to 2.012e-008) | M                                     |            |
|                                                                                    |                                                                                   |                                                                                           |                                       | Top                                   | 0.003487 (0.0002021 to 0.006742)      | Δ Net BRET                            |            |
|                                                                                    |                                                                                   |                                                                                           |                                       | Bottom                                | 0.09830 (0.09463 to 0.1020)           | Δ Net BRET                            |            |
|                                                                                    | Effect of SR142948A vs. SBI-553 on NT-induced recruitment of mini G <sub>αs</sub> | 3                                                                                         | SBI-553                               | IC <sub>50</sub>                      | 5.494e-009 (2.383e-009 to 1.368e-008) | M                                     |            |
|                                                                                    |                                                                                   |                                                                                           |                                       | Top                                   | 0.01117 (0.009764 to 0.01250)         | Δ Net BRET                            |            |
|                                                                                    |                                                                                   |                                                                                           |                                       | Bottom                                | 0.02551 (0.02261 to 0.02849)          | Δ Net BRET                            |            |
|                                                                                    |                                                                                   | SR142948A                                                                                 | IC <sub>50</sub>                      | 1.055e-008 (3.626e-009 to 3.216e-008) | M                                     |                                       |            |
|                                                                                    |                                                                                   |                                                                                           | Top                                   | 0.004397 (0.001924 to 0.006809)       | Δ Net BRET                            |                                       |            |
|                                                                                    |                                                                                   |                                                                                           | Bottom                                | 0.02416 (0.02132 to 0.02710)          | Δ Net BRET                            |                                       |            |
|                                                                                    | Effect of SR142948A vs. SBI-553 on NT-induced recruitment of mini G <sub>αo</sub> | 3                                                                                         | SBI-553                               | IC <sub>50</sub>                      | 1.019e-008 (3.892e-009 to 2.522e-008) | M                                     |            |
|                                                                                    |                                                                                   |                                                                                           |                                       | Top                                   | 0.02176 (0.01974 to 0.02345)          | Δ Net BRET                            |            |
|                                                                                    |                                                                                   |                                                                                           |                                       | Bottom                                | 0.02583 (0.02090 to 0.02676)          | Δ Net BRET                            |            |
|                                                                                    |                                                                                   | SR142948A                                                                                 | IC <sub>50</sub>                      | 3.694e-009 (ND)                       | M                                     |                                       |            |
|                                                                                    |                                                                                   |                                                                                           | Top                                   | 0.003910 (0.001731 to 0.006042)       | Δ Net BRET                            |                                       |            |
|                                                                                    |                                                                                   |                                                                                           | Bottom                                | 0.02507 (0.02299 to 0.02719)          | Δ Net BRET                            |                                       |            |
| Effect of SR142948A vs. SBI-553 on NT-induced recruitment of mini G <sub>α12</sub> | 3                                                                                 | SBI-553                                                                                   | IC <sub>50</sub>                      | 2.265e-009 (5.540e-010 to 6.552e-009) | M                                     |                                       |            |
|                                                                                    |                                                                                   |                                                                                           | Top                                   | 0.02865 (0.02686 to 0.03050)          | Δ Net BRET                            |                                       |            |
|                                                                                    |                                                                                   |                                                                                           | Bottom                                | 0.01426 (0.01052 to 0.01796)          | Δ Net BRET                            |                                       |            |
|                                                                                    | SR142948A                                                                         | IC <sub>50</sub>                                                                          | 1.996e-008 (2.533e-009 to 1.869e-007) | M                                     |                                       |                                       |            |
|                                                                                    |                                                                                   | Top                                                                                       | 0.005963 (0.003774 to 0.007751)       | Δ Net BRET                            |                                       |                                       |            |
|                                                                                    |                                                                                   | Bottom                                                                                    | 0.01335 (0.01171 to 0.01508)          | Δ Net BRET                            |                                       |                                       |            |
| 3                                                                                  | C                                                                                 | Effect of SBI-553 on NT-induced recruitment of mini G <sub>αq</sub> in β-arrestin1/2-null | 3                                     | Parental HEK293 cells                 | IC <sub>50</sub>                      | 2.286e-008 (1.815e-008 to 2.904e-008) | M          |
|                                                                                    |                                                                                   |                                                                                           |                                       |                                       | Top                                   | 0.09135 (0.08708 to 0.09572)          | Δ Net BRET |
|                                                                                    |                                                                                   |                                                                                           |                                       |                                       | Bottom                                | -0.02950 (-0.03419 to -0.02557)       | Δ Net BRET |

|                           |   |                                        |                  |                                       |                   |
|---------------------------|---|----------------------------------------|------------------|---------------------------------------|-------------------|
| vs. Parental HEK293 cells | 3 | $\beta$ -arrestin1/2-null HEK293 cells | IC <sub>50</sub> | 1.022e-008 (7.769e-009 to 1.351e-008) | M                 |
|                           |   |                                        | Top              | 0.1194 (0.1128 to 0.1261)             | $\Delta$ Net BRET |
|                           |   |                                        | Bottom           | -0.02246 (-0.02846 to -0.01751)       | $\Delta$ Net BRET |

CI, confidence interval; NT, neurotensin; SBI-553, SBI-0654553; EC<sub>50</sub>, half-maximal effective concentration; ND, not defined

**Table S4. Curve parameters and statistical comparisons presented in Figure 4 – Supporting Figure 4.**

| Fig | Panel | Description                                                                                | N | Condition     | Parameter        | Mean (95% CI)                         | Units       |
|-----|-------|--------------------------------------------------------------------------------------------|---|---------------|------------------|---------------------------------------|-------------|
| 4   | A     | Illustration                                                                               |   |               |                  |                                       |             |
| 4   | B     | Effect of SBI-553 on NT-induced activation of $G_{\alpha A}^{G_{\alpha q} \text{ C-term}}$ | 3 | Vehicle       | EC <sub>50</sub> | 2.001e-009 (1.278e-009 to 3.133e-009) | M           |
|     |       |                                                                                            |   |               | Top              | 0.3083 (0.2909 to 0.3256)             | -Δ Net BRET |
|     |       |                                                                                            |   |               | Bottom           | -0.004874 (-0.02360 to 0.01385)       | -Δ Net BRET |
|     |       |                                                                                            |   | 1 μM SBI-553  | EC <sub>50</sub> | 9.427e-009 (6.001e-009 to 1.481e-008) | M           |
|     |       |                                                                                            |   |               | Top              | 0.2294 (0.2132 to 0.2456)             | -Δ Net BRET |
|     |       |                                                                                            |   |               | Bottom           | -0.01694 (-0.03069 to -0.003181)      | -Δ Net BRET |
|     |       |                                                                                            |   | 3 μM SBI-553  | EC <sub>50</sub> | 1.328e-008 (9.228e-009 to 1.911e-008) | M           |
|     |       |                                                                                            |   |               | Top              | 0.1828 (0.1719 to 0.1937)             | -Δ Net BRET |
|     |       |                                                                                            |   |               | Bottom           | -0.01915 (-0.02798 to -0.01033)       | -Δ Net BRET |
|     |       |                                                                                            |   | 10 μM SBI-553 | EC <sub>50</sub> | 1.611e-008 (8.681e-009 to 2.990e-008) | M           |
|     |       |                                                                                            |   |               | Top              | 0.1466 (0.1316 to 0.1617)             | -Δ Net BRET |
|     |       |                                                                                            |   |               | Bottom           | -0.01726 (-0.02910 to -0.005414)      | -Δ Net BRET |
|     |       |                                                                                            |   | 30 μM SBI-553 | EC <sub>50</sub> | 2.783e-008 (1.528e-008 to 5.070e-008) | M           |
|     |       |                                                                                            |   |               | Top              | 0.1194 (0.1086 to 0.1301)             | -Δ Net BRET |
|     |       |                                                                                            |   |               | Bottom           | 0.0001591 (-0.007512 to 0.007831)     | -Δ Net BRET |
| 4   | C     | Effect of SBI-553 on NT-induced activation of $G_{\alpha q}^{G_{\alpha A} \text{ C-term}}$ | 3 | Vehicle       | EC <sub>50</sub> | 8.359e-9 (5.446e-9 to 1.283e-8)       | M           |
|     |       |                                                                                            |   |               | Top              | 0.2349 (0.2198 to 0.2501)             | -Δ Net BRET |
|     |       |                                                                                            |   |               | Bottom           | -0.01111 (-0.02419 to 0.001977)       | -Δ Net BRET |
|     |       |                                                                                            |   | 1 μM SBI-553  | EC <sub>50</sub> | 5.962e-9 (3.824e-9 to 9.296e-9)       | M           |
|     |       |                                                                                            |   |               | Top              | 0.1630 (0.1522 to 0.1739)             | -Δ Net BRET |
|     |       |                                                                                            |   |               | Bottom           | -0.01512 (-0.02493 to -0.005305)      | -Δ Net BRET |
|     |       |                                                                                            |   | 3 μM SBI-553  | EC <sub>50</sub> | 4.269e-9 (2.941e-9 to 6.198e-9)       | M           |
|     |       |                                                                                            |   |               | Top              | 0.1635 (0.1551 to 0.1719)             | -Δ Net BRET |
|     |       |                                                                                            |   |               | Bottom           | -0.009743 (-0.01773 to -0.001759)     | -Δ Net BRET |
|     |       |                                                                                            |   | 10 μM SBI-553 | EC <sub>50</sub> | 4.339e-9 (2.651e-9 to 7.103e-9)       | M           |
|     |       |                                                                                            |   |               | Top              | 0.1533 (0.1436 to 0.1631)             | -Δ Net BRET |
|     |       |                                                                                            |   |               | Bottom           | 0.001367 (-0.007892 to 0.01063)       | -Δ Net BRET |
|     |       |                                                                                            |   | 30 μM SBI-553 | EC <sub>50</sub> | 7.361e-9 (4.406e-9 to 1.230e-8)       | M           |
|     |       |                                                                                            |   |               | Top              | 0.1268 (0.1180 to 0.1355)             | -Δ Net BRET |
|     |       |                                                                                            |   |               | Bottom           | 0.007651 (0.001782 to 0.01352)        | -Δ Net BRET |
| 4   | D     | Illustration                                                                               |   |               |                  |                                       |             |

|   |   |                                                                                              |               |                                   |                                       |                                       |                                |                  |                                       |                 |
|---|---|----------------------------------------------------------------------------------------------|---------------|-----------------------------------|---------------------------------------|---------------------------------------|--------------------------------|------------------|---------------------------------------|-----------------|
| 4 | E | Effect of SBI-553 on NT-induced activation of G <sub>α</sub> q <sup>Δ234-246 GαoA</sup>      | 9             | Vehicle                           | EC <sub>50</sub>                      | 1.779e-008 (4.386e-009 to 7.215e-008) | M                              |                  |                                       |                 |
|   |   |                                                                                              |               |                                   | Top                                   | 0.05623 (0.04437 to 0.06809)          | -Δ Net BRET                    |                  |                                       |                 |
|   |   |                                                                                              |               |                                   | Bottom                                | -0.0008487 (-0.01004 to 0.008345)     | -Δ Net BRET                    |                  |                                       |                 |
|   |   |                                                                                              | 1 μM SBI-553  | EC <sub>50</sub>                  | 5.821e-009 (3.054e-009 to 1.109e-008) | M                                     |                                |                  |                                       |                 |
|   |   |                                                                                              |               | Top                               | 0.06294 (0.05567 to 0.07021)          | -Δ Net BRET                           |                                |                  |                                       |                 |
|   |   |                                                                                              |               | Bottom                            | -0.01949 (-0.02607 to -0.01290)       | -Δ Net BRET                           |                                |                  |                                       |                 |
|   |   |                                                                                              | 3 μM SBI-553  | EC <sub>50</sub>                  | 5.542e-009 (2.872e-009 to 1.070e-008) | M                                     |                                |                  |                                       |                 |
|   |   |                                                                                              |               | Top                               | 0.06090 (0.05348 to 0.06832)          | -Δ Net BRET                           |                                |                  |                                       |                 |
|   |   |                                                                                              |               | Bottom                            | -0.02225 (-0.02902 to -0.01548)       | -Δ Net BRET                           |                                |                  |                                       |                 |
|   |   |                                                                                              | 10 μM SBI-553 | EC <sub>50</sub>                  | 4.049e-009 (1.760e-009 to 9.313e-009) | M                                     |                                |                  |                                       |                 |
|   |   |                                                                                              |               | Top                               | 0.04991 (0.04303 to 0.05678)          | -Δ Net BRET                           |                                |                  |                                       |                 |
|   |   |                                                                                              |               | Bottom                            | -0.01402 (-0.02061 to -0.007426)      | -Δ Net BRET                           |                                |                  |                                       |                 |
|   |   |                                                                                              | 30 μM SBI-553 | EC <sub>50</sub>                  | 5.451e-009 (1.028e-009 to 2.891e-008) | M                                     |                                |                  |                                       |                 |
|   |   |                                                                                              |               | Top                               | 0.02168 (0.01402 to 0.02934)          | -Δ Net BRET                           |                                |                  |                                       |                 |
|   |   |                                                                                              |               | Bottom                            | -0.01224 (-0.01925 to -0.005238)      | -Δ Net BRET                           |                                |                  |                                       |                 |
| 4 | F | G protein C-terminus amino acid alignment                                                    |               |                                   |                                       |                                       |                                |                  |                                       |                 |
| 4 | G | Comparison of amino acid properties at positions that differ between Gq and other G proteins |               |                                   |                                       |                                       |                                |                  |                                       |                 |
| 4 | H | NT-induced activation of Gq point mutants                                                    | 3-4           | G <sub>α</sub> q <sup>WT</sup>    | EC <sub>50</sub>                      | 4.078e-009 (2.678e-009 to 6.210e-009) | M                              |                  |                                       |                 |
|   |   |                                                                                              |               |                                   | Top                                   | 0.2992 (0.2823 to 0.3161)             | -Δ Net BRET                    |                  |                                       |                 |
|   |   |                                                                                              |               |                                   | Bottom                                | -0.01188 (-0.02807 to 0.004317)       | -Δ Net BRET                    |                  |                                       |                 |
|   |   |                                                                                              |               | G <sub>α</sub> q <sup>V246Y</sup> | EC <sub>50</sub>                      | 1.937e-008 (1.251e-008 to 3.000e-008) | M                              |                  |                                       |                 |
|   |   |                                                                                              |               |                                   | Top                                   | 0.2717 (0.2536 to 0.2899)             | -Δ Net BRET                    |                  |                                       |                 |
|   |   |                                                                                              |               |                                   | Bottom                                | -0.007551 (-0.02141 to 0.006312)      | -Δ Net BRET                    |                  |                                       |                 |
|   |   |                                                                                              |               | G <sub>α</sub> q <sup>N244G</sup> | EC <sub>50</sub>                      | 5.260e-009 (3.847e-009 to 7.192e-009) | M                              |                  |                                       |                 |
|   |   |                                                                                              |               |                                   | Top                                   | 0.2809 (0.2691 to 0.2927)             | -Δ Net BRET                    |                  |                                       |                 |
|   |   |                                                                                              |               |                                   | Bottom                                | 0.001289 (-0.009536 to 0.01211)       | -Δ Net BRET                    |                  |                                       |                 |
|   |   |                                                                                              |               | G <sub>α</sub> q <sup>Y243C</sup> | EC <sub>50</sub>                      | 5.641e-009 (3.759e-009 to 8.466e-009) | M                              |                  |                                       |                 |
|   |   |                                                                                              |               |                                   | Top                                   | 0.2971 (0.2807 to 0.3135)             | -Δ Net BRET                    |                  |                                       |                 |
|   |   |                                                                                              |               |                                   | Bottom                                | 0.0001203 (-0.01482 to 0.01506)       | -Δ Net BRET                    |                  |                                       |                 |
|   |   |                                                                                              |               | G <sub>α</sub> q <sup>L238N</sup> | EC <sub>50</sub>                      | 6.996e-009 (2.083e-009 to 2.350e-008) | M                              |                  |                                       |                 |
|   |   |                                                                                              |               |                                   | Top                                   | 0.06447 (0.05225 to 0.07670)          | -Δ Net BRET                    |                  |                                       |                 |
|   |   |                                                                                              |               |                                   | Bottom                                | -0.007251 (-0.01805 to 0.003547)      | -Δ Net BRET                    |                  |                                       |                 |
|   |   |                                                                                              | 4             | I                                 | Effect of SBI-553 on NT-induced       | 3-7                                   | G <sub>α</sub> q <sup>WT</sup> | IC <sub>50</sub> | 1.603e-006 (1.153e-006 to 2.229e-006) | M               |
|   |   |                                                                                              |               |                                   |                                       |                                       |                                | Top              | 102.1 (97.48 to 106.7)                | % NT Activation |



|          |          |                                                                                                                                                                |                                   |                        |                                       |                 |
|----------|----------|----------------------------------------------------------------------------------------------------------------------------------------------------------------|-----------------------------------|------------------------|---------------------------------------|-----------------|
|          |          | activation of Gq point mutants                                                                                                                                 |                                   | Bottom                 | 3.250 (-3.808 to 10.31)               | % NT Activation |
|          |          |                                                                                                                                                                | G <sub>α</sub> q <sup>V246Y</sup> | IC <sub>50</sub>       | 6.488e-007 (4.873e-007 to 8.638e-007) | M               |
|          |          |                                                                                                                                                                |                                   | Top                    | 103.9 (89.37 to 118.5)                | % NT Activation |
|          |          |                                                                                                                                                                |                                   | Bottom                 | 4.024 (-0.8469 to 8.895)              | % NT Activation |
|          |          |                                                                                                                                                                | G <sub>α</sub> q <sup>N244G</sup> | IC <sub>50</sub>       | 6.488e-7 (4.873e-7 to 8.638e-7)       | M               |
|          |          |                                                                                                                                                                |                                   | Top                    | 105.7 (101.4 to 110.0)                | % NT Activation |
|          |          |                                                                                                                                                                |                                   | Bottom                 | 14.26 (9.590 to 18.94)                | % NT Activation |
|          |          |                                                                                                                                                                | G <sub>α</sub> q <sup>Y243C</sup> | IC <sub>50</sub>       | 1.637e-007 (1.176e-007 to 2.279e-007) | M               |
|          |          |                                                                                                                                                                |                                   | Top                    | 102.7 (95.22 to 110.3)                | % NT Activation |
|          |          |                                                                                                                                                                |                                   | Bottom                 | 2.096 (-2.288 to 6.479)               | % NT Activation |
|          |          |                                                                                                                                                                | G <sub>α</sub> q <sup>L238N</sup> | IC <sub>50</sub>       | 6.797e-008 (4.490e-008 to 1.029e-007) | M               |
|          |          |                                                                                                                                                                |                                   | Top                    | 210.1 (13.41 to 406.8)                | % NT Activation |
|          |          |                                                                                                                                                                |                                   | Bottom                 | 102.4 (93.36 to 111.5)                | % NT Activation |
| <b>4</b> | <b>J</b> | Structures of NTSR1-GoA (left), NTSR1-SBI-553-GoA (middle), and NTSR1-Gq (right)                                                                               |                                   |                        |                                       |                 |
| <b>4</b> | <b>K</b> | Illustration                                                                                                                                                   |                                   |                        |                                       |                 |
| <b>4</b> | <b>L</b> | Illustration                                                                                                                                                   |                                   |                        |                                       |                 |
| <b>4</b> | <b>M</b> | Illustration                                                                                                                                                   |                                   |                        |                                       |                 |
| <b>4</b> | <b>N</b> | NTSR1-SBI-553-G protein 'open' position free energy of dissociation categorized by extent of SBI-553 inhibition                                                |                                   |                        |                                       |                 |
| <b>4</b> | <b>O</b> | Correlation of NTSR1-SBI-553-G protein 'open' position free energy of dissociation vs. SBI-553-induced change in NT potency correlation                        |                                   |                        |                                       |                 |
|          |          | Null hypothesis                                                                                                                                                |                                   | Slope = 0              |                                       |                 |
|          |          | Alternative hypothesis                                                                                                                                         |                                   | Slope unconstrained    |                                       |                 |
|          |          | P value                                                                                                                                                        |                                   | <0.0001                |                                       |                 |
|          |          | Conclusion (alpha = 0.05)                                                                                                                                      |                                   | Reject null hypothesis |                                       |                 |
|          |          | Preferred model                                                                                                                                                |                                   | Slope unconstrained    |                                       |                 |
|          |          | F (DFn, DFd)                                                                                                                                                   |                                   | 164.4 (1, 7)           |                                       |                 |
|          |          | Slope unconstrained                                                                                                                                            |                                   |                        |                                       |                 |
|          |          | Best-fit values                                                                                                                                                |                                   |                        |                                       |                 |
|          |          | Y-Intercept                                                                                                                                                    |                                   | 0.4434                 |                                       |                 |
|          |          | Slope                                                                                                                                                          |                                   | 0.3976                 |                                       |                 |
|          |          | 95% CI (profile likelihood)                                                                                                                                    |                                   |                        |                                       |                 |
|          |          | Y-Intercept                                                                                                                                                    |                                   | 0.3187 to 0.5681       |                                       |                 |
|          |          | Slope                                                                                                                                                          |                                   | 0.3242 to 0.4709       |                                       |                 |
|          |          | Goodness of Fit                                                                                                                                                |                                   |                        |                                       |                 |
|          |          | Degrees of Freedom                                                                                                                                             |                                   | 7                      |                                       |                 |
|          |          | R squared                                                                                                                                                      |                                   | 0.9591                 |                                       |                 |
| <b>4</b> | <b>P</b> | Correlation of NTSR1-SBI-553-G protein 'open' position free energy of dissociation vs. max SBI-553-induced delta BRET in TRUPATH assay of G protein activation |                                   |                        |                                       |                 |
|          |          | Comparison of Fits                                                                                                                                             |                                   |                        |                                       |                 |
|          |          | Null hypothesis                                                                                                                                                |                                   | Slope = 0              |                                       |                 |
|          |          | Alternative hypothesis                                                                                                                                         |                                   | Slope unconstrained    |                                       |                 |
|          |          | P value                                                                                                                                                        |                                   | 0.0005                 |                                       |                 |
|          |          | Conclusion (alpha = 0.05)                                                                                                                                      |                                   | Reject null hypothesis |                                       |                 |
|          |          | Preferred model                                                                                                                                                |                                   | Slope unconstrained    |                                       |                 |
|          |          | F (DFn, DFd)                                                                                                                                                   |                                   | 37.99 (1, 7)           |                                       |                 |

|          |          |                             |                  |
|----------|----------|-----------------------------|------------------|
|          |          | Slope unconstrained         |                  |
|          |          | Best-fit values             |                  |
|          |          | Y-Intercept                 | 0.4587           |
|          |          | Slope                       | 5.387            |
|          |          | 95% CI (profile likelihood) |                  |
|          |          | Y-Intercept                 | 0.2107 to 0.7067 |
|          |          | Slope                       | 3.320 to 7.453   |
|          |          | Goodness of Fit             |                  |
|          |          | Degrees of Freedom          | 7                |
|          |          | R squared                   | 0.8444           |
| <b>4</b> | <b>Q</b> | Illustration                |                  |

CI, confidence interval; NT, neurotensin; SBI-553, SBI-0654553; EC<sub>50</sub>, half-maximal effective concentration; ND, not defined

**Table S5. Curve parameters and statistical comparisons presented in Figure 5 – Supporting Figure 5.**

| Fig                                                                                 | Panel   | Description                                                                         | N                                  | Condition                             | Parameter                        | Mean (95% CI)                     | Units       |
|-------------------------------------------------------------------------------------|---------|-------------------------------------------------------------------------------------|------------------------------------|---------------------------------------|----------------------------------|-----------------------------------|-------------|
| 5                                                                                   | A       | Structure Image                                                                     |                                    |                                       |                                  |                                   |             |
| 5                                                                                   | B       | SAR summary                                                                         |                                    |                                       |                                  |                                   |             |
| 5                                                                                   | C       | Comparison of SBI-553 and SBI-342 structures                                        |                                    |                                       |                                  |                                   |             |
| 5                                                                                   | D       | Effect of SBI-553 vs. SBI-342 on NT (100 nM)-induced activation of G <sub>αq</sub>  | 3                                  | SBI-553                               | IC <sub>50</sub>                 | 1.976e-6 (1.413e-6 to 2.764e-6)   | M           |
|                                                                                     |         |                                                                                     |                                    |                                       | Top                              | 0.2546 (0.2431 to 0.2661)         | -Δ Net BRET |
|                                                                                     |         |                                                                                     |                                    |                                       | Bottom                           | 0.006087 (-0.01280 to 0.02497)    | -Δ Net BRET |
|                                                                                     |         |                                                                                     | SBI-342                            | IC <sub>50</sub>                      | 6.659e-6 (4.403e-6 to 1.007e-5)  | M                                 |             |
|                                                                                     |         |                                                                                     |                                    | Top                                   | 0.2594 (0.2526 to 0.2661)        | -Δ Net BRET                       |             |
|                                                                                     |         |                                                                                     |                                    | Bottom                                | 0.06608 (0.04050 to 0.09166)     | -Δ Net BRET                       |             |
|                                                                                     |         | Effect of SBI-553 vs. SBI-342 on NT (100 nM)-induced activation of G <sub>αi1</sub> | 3                                  | SBI-553                               | IC <sub>50</sub>                 | 2.261e-7 (7.741e-008 to 6.604e-7) | M           |
|                                                                                     |         |                                                                                     |                                    |                                       | Top                              | 0.2530 (0.2339 to 0.2720)         | -Δ Net BRET |
|                                                                                     |         |                                                                                     |                                    |                                       | Bottom                           | 0.1778 (0.1672 to 0.1885)         | -Δ Net BRET |
|                                                                                     |         |                                                                                     | SBI-342                            | IC <sub>50</sub>                      | 1.481e-6 (7.568e-7 to 2.898e-6)  | M                                 |             |
|                                                                                     |         |                                                                                     |                                    | Top                                   | 0.2650 (0.2556 to 0.2743)        | -Δ Net BRET                       |             |
|                                                                                     |         |                                                                                     |                                    | Bottom                                | 0.1646 (0.1501 to 0.1791)        | -Δ Net BRET                       |             |
| Effect of SBI-553 vs. SBI-342 on NT (100 nM)-induced activation of G <sub>αoA</sub> | 3       | SBI-553                                                                             | IC <sub>50</sub>                   | 8.548e-006 (4.621e-007 to 0.0001581)  | M                                |                                   |             |
|                                                                                     |         |                                                                                     | Top                                | 0.1877 (0.1717 to 0.2037)             | -Δ Net BRET                      |                                   |             |
|                                                                                     |         |                                                                                     | Bottom                             | 0.2533 (0.1880 to 0.3186)             | -Δ Net BRET                      |                                   |             |
|                                                                                     | SBI-342 | IC <sub>50</sub>                                                                    | 5.841e-6 (2.127e-6 to 1.604e-5)    | M                                     |                                  |                                   |             |
|                                                                                     |         | Top                                                                                 | 0.2098 (0.2010 to 0.2186)          | -Δ Net BRET                           |                                  |                                   |             |
|                                                                                     |         | Bottom                                                                              | 0.1127 (0.08263 to 0.1428)         | -Δ Net BRET                           |                                  |                                   |             |
| Effect of SBI-553 vs. SBI-342 on NT (100 nM)-induced activation of G <sub>α12</sub> | 3       | SBI-553                                                                             | IC <sub>50</sub>                   | 2.400e-008 (1.183e-009 to 4.870e-007) | M                                |                                   |             |
|                                                                                     |         |                                                                                     | Top                                | 0.1544 (0.08356 to 0.2253)            | -Δ Net BRET                      |                                   |             |
|                                                                                     |         |                                                                                     | Bottom                             | 0.2183 (0.2080 to 0.2285)             | -Δ Net BRET                      |                                   |             |
|                                                                                     | SBI-342 | IC <sub>50</sub>                                                                    | 1.036e-005 (1.238e-009 to 0.08676) | M                                     |                                  |                                   |             |
|                                                                                     |         | Top                                                                                 | 0.1782 (0.1605 to 0.1959)          | -Δ Net BRET                           |                                  |                                   |             |
|                                                                                     |         | Bottom                                                                              | 0.2074 (0.1091 to 0.3057)          | -Δ Net BRET                           |                                  |                                   |             |
| 5                                                                                   | E       | SBI-553 and SBI-342-induced recruitment of β-arrestin2                              | 3                                  | SBI-553                               | EC <sub>50</sub>                 | 5.991e-6 (5.018e-6 to 7.153e-6)   | M           |
|                                                                                     |         |                                                                                     |                                    |                                       | Top                              | 0.6339 (0.5995 to 0.6683)         | Δ Net BRET  |
|                                                                                     |         |                                                                                     |                                    |                                       | Bottom                           | 0.003077 (-0.007140 to 0.01329)   | Δ Net BRET  |
|                                                                                     |         |                                                                                     | SBI-342                            | EC <sub>50</sub>                      | 7.563e-6 (6.020e-6 to 9.500e-6)  | M                                 |             |
|                                                                                     |         |                                                                                     |                                    | Top                                   | 0.6202 (0.5728 to 0.6675)        | Δ Net BRET                        |             |
|                                                                                     |         |                                                                                     |                                    | Bottom                                | -0.001912 (-0.01318 to 0.009359) | Δ Net BRET                        |             |
| 5                                                                                   | F       | Effect of SBI-553 vs. SBI-                                                          | 6                                  | NT + 30 μM SBI-553                    | EC <sub>50</sub>                 | 1.385e-008 (8.070e-9 to 2.377e-8) | M           |

|          |          |                                                                                                      |                    |                    |                                       |                                 |   |
|----------|----------|------------------------------------------------------------------------------------------------------|--------------------|--------------------|---------------------------------------|---------------------------------|---|
|          |          | 342 on NT-induced activation of G <sub>α</sub> oA (NT dose-response)                                 |                    | Top                | 0.1710 (0.1631 to 0.1790)             | -Δ Net BRET                     |   |
|          |          |                                                                                                      |                    | Bottom             | 0.07148 (0.06506 to 0.07791)          | -Δ Net BRET                     |   |
|          |          |                                                                                                      | NT + 30 μM SBI-342 | EC <sub>50</sub>   | 2.175e-8 (8.085e-9 to 5.850e-8)       | M                               |   |
|          |          |                                                                                                      |                    | Top                | 0.08451 (0.06807 to 0.1009)           | -Δ Net BRET                     |   |
|          |          |                                                                                                      |                    | Bottom             | -0.02726 (-0.03957 to -0.01495)       | -Δ Net BRET                     |   |
|          |          |                                                                                                      | NT + Vehicle       | EC <sub>50</sub>   | 8.244e-9 (5.406e-9 to 1.257e-8)       | M                               |   |
|          |          |                                                                                                      |                    | Top                | 0.1764 (0.1646 to 0.1882)             | -Δ Net BRET                     |   |
|          |          |                                                                                                      |                    | Bottom             | -0.01807 (-0.02826 to -0.007876)      | -Δ Net BRET                     |   |
| <b>5</b> | <b>G</b> | Effect of SBI-342 on G <sub>α</sub> oA activation in non-NTSR1-expressing HEK293T cells              | 3                  | Slope              | 0.004923 (0.0003748 to 0.009472)      | -Δ Net BRET                     |   |
|          |          |                                                                                                      |                    | Y-intercept        | 0.04403 (0.01508 to 0.07298)          | -Δ Net BRET                     |   |
| <b>5</b> | <b>H</b> | Effect of SBI-342 on dopamine-induced activation of G <sub>α</sub> oA in D2-expressing HEK293T cells | 3                  | Dopamine + Vehicle | EC <sub>50</sub>                      | 6.066e-8 (4.393e-8 to 8.496e-8) | M |
|          |          |                                                                                                      |                    | Top                | 0.2371 (0.2266 to 0.2492)             | -Δ Net BRET                     |   |
|          |          |                                                                                                      |                    | Bottom             | -0.0007679 (-0.01027 to 0.007998)     | -Δ Net BRET                     |   |
|          |          |                                                                                                      | Dopamine + SBI-342 | EC <sub>50</sub>   | 6.663e-9 (4.133e-9 to 1.051e-8)       | M                               |   |
|          |          |                                                                                                      |                    | Top                | 0.2871 (0.2736 to 0.3024)             | -Δ Net BRET                     |   |
|          |          |                                                                                                      |                    | Bottom             | -0.006840 (-0.03060 to 0.01191)       | -Δ Net BRET                     |   |
| <b>5</b> | <b>I</b> | Effect of SBI-553 vs. SBI-342 on NT (100 nM)-induced activation of G <sub>α</sub> o Shedding         | 4                  | SBI-553            | IC <sub>50</sub>                      | 1.426e-7 (8.519e-8 to 2.893e-7) | M |
|          |          |                                                                                                      |                    | Top                | 14.60 (13.94 to 15.26)                | % AP Shedding                   |   |
|          |          |                                                                                                      |                    | Bottom             | 10.95 (9.954 to 11.79)                | % AP Shedding                   |   |
|          |          |                                                                                                      | SBI-342            | IC <sub>50</sub>   | 5.636e-7 (4.096e-007 to 8.037e-7)     | M                               |   |
|          |          |                                                                                                      |                    | Top                | 13.72 (12.95 to 14.56)                | % AP Shedding                   |   |
|          |          |                                                                                                      |                    | Bottom             | 0.5828 (-1.160 to 1.859)              | % AP Shedding                   |   |
| <b>5</b> | <b>J</b> | Effect of SBI-553 vs. SBI-342 on NT (100 nM)-induced mini G <sub>α</sub> o Recruitment               | 3                  | SBI-553            | IC <sub>50</sub>                      | 1.214e-7 (ND)                   | M |
|          |          |                                                                                                      |                    | Top                | 0.02417 (0.02143 to NA)               | Δ Net BRET                      |   |
|          |          |                                                                                                      |                    | Bottom             | 0.01855 (0.01650 to 0.02025)          | Δ Net BRET                      |   |
|          |          |                                                                                                      | SBI-342            | IC <sub>50</sub>   | 9.144e-7 (2.465e-007 to 3.196e-6)     | M                               |   |
|          |          |                                                                                                      |                    | Top                | 0.02573 (0.02185 to 0.03053)          | Δ Net BRET                      |   |
|          |          |                                                                                                      |                    | Bottom             | 0.004451 (-0.0009533 to 0.008759)     | Δ Net BRET                      |   |
| <b>5</b> | <b>K</b> | Structure Image                                                                                      |                    |                    |                                       |                                 |   |
| <b>5</b> | <b>L</b> | Comparison of SBI-553 and SBI-593 structures                                                         |                    |                    |                                       |                                 |   |
| <b>5</b> | <b>M</b> | Effect of SBI-553 vs. SBI-593 on NT (100 nM)-induced activation of G <sub>α</sub> q                  | 3                  | SBI-553            | IC <sub>50</sub>                      | 1.976e-6 (1.413e-6 to 2.764e-6) | M |
|          |          |                                                                                                      |                    | Top                | 0.2546 (0.2431 to 0.2661)             | -Δ Net BRET                     |   |
|          |          |                                                                                                      |                    | Bottom             | 0.006087 (-0.01280 to 0.02497)        | -Δ Net BRET                     |   |
|          |          |                                                                                                      | SBI-593            | IC <sub>50</sub>   | 3.227e-006 (1.533e-006 to 6.791e-006) | M                               |   |
|          |          |                                                                                                      |                    | Top                | 0.2533 (0.2456 to 0.2610)             | -Δ Net BRET                     |   |

|          |                                                                                      |         |                    |                                       |                                       |                                     |             |                                   |               |
|----------|--------------------------------------------------------------------------------------|---------|--------------------|---------------------------------------|---------------------------------------|-------------------------------------|-------------|-----------------------------------|---------------|
|          |                                                                                      |         |                    | Bottom                                | 0.1612 (0.1434 to 0.1790)             | -Δ Net BRET                         |             |                                   |               |
|          | Effect of SBI-553 vs. SBI-593 on NT (100nM)-induced activation of G <sub>α</sub> i1  | 3       | SBI-553            | IC <sub>50</sub>                      | 2.261e-7 (7.741e-008 to 6.604e-7)     | M                                   |             |                                   |               |
|          |                                                                                      |         |                    | Top                                   | 0.2530 (0.2339 to 0.2720)             | -Δ Net BRET                         |             |                                   |               |
|          |                                                                                      |         |                    | Bottom                                | 0.1778 (0.1672 to 0.1885)             | -Δ Net BRET                         |             |                                   |               |
|          |                                                                                      | SBI-593 | IC <sub>50</sub>   | 1.048e-006 (4.066e-007 to 2.703e-006) | M                                     |                                     |             |                                   |               |
|          |                                                                                      |         | Top                | 0.2617 (0.2521 to 0.2713)             | -Δ Net BRET                           |                                     |             |                                   |               |
|          |                                                                                      |         | Bottom             | 0.1940 (0.1813 to 0.2068)             | -Δ Net BRET                           |                                     |             |                                   |               |
|          | Effect of SBI-553 vs. SBI-593 on NT (100 nM)-induced activation of G <sub>α</sub> oA | 3       | SBI-553            | IC <sub>50</sub>                      | 8.548e-006 (4.621e-007 to 0.0001581)  | M                                   |             |                                   |               |
|          |                                                                                      |         |                    | Top                                   | 0.1877 (0.1717 to 0.2037)             | -Δ Net BRET                         |             |                                   |               |
|          |                                                                                      |         |                    | Bottom                                | 0.2533 (0.1880 to 0.3186)             | -Δ Net BRET                         |             |                                   |               |
|          |                                                                                      | SBI-593 | IC <sub>50</sub>   | 2.029e-005 (7.550e-034 to 5.455e+023) | M                                     |                                     |             |                                   |               |
|          |                                                                                      |         | Top                | 0.2044 (0.1950 to 0.2138)             | -Δ Net BRET                           |                                     |             |                                   |               |
|          |                                                                                      |         | Bottom             | 0.1323 (-3.984 to 4.249)              | -Δ Net BRET                           |                                     |             |                                   |               |
|          | Effect of SBI-553 vs. SBI-593 on NT (100 nM)-induced activation of G <sub>α</sub> 12 | 3       | SBI-553            | IC <sub>50</sub>                      | 2.400e-008 (1.183e-009 to 4.870e-007) | M                                   |             |                                   |               |
|          |                                                                                      |         |                    | Top                                   | 0.1544 (0.08356 to 0.2253)            | -Δ Net BRET                         |             |                                   |               |
|          |                                                                                      |         |                    | Bottom                                | 0.2183 (0.2080 to 0.2285)             | -Δ Net BRET                         |             |                                   |               |
|          |                                                                                      | SBI-593 | IC <sub>50</sub>   | 1.634e-007 (2.287e-009 to 1.168e-005) | M                                     |                                     |             |                                   |               |
|          |                                                                                      |         | Top                | 0.1715 (0.1246 to 0.2183)             | -Δ Net BRET                           |                                     |             |                                   |               |
|          |                                                                                      |         | Bottom             | 0.2200 (0.1927 to 0.2473)             | -Δ Net BRET                           |                                     |             |                                   |               |
| <b>5</b> | <b>N</b>                                                                             | 3       | SBI-553            | EC <sub>50</sub>                      | 5.991e-6 (5.018e-6 to 7.153e-6)       | M                                   |             |                                   |               |
|          |                                                                                      |         |                    |                                       | Top                                   | 0.6339 (0.5995 to 0.6683)           | Δ Net BRET  |                                   |               |
|          |                                                                                      |         |                    |                                       | Bottom                                | 0.003077 (-0.007140 to 0.01329)     | Δ Net BRET  |                                   |               |
|          |                                                                                      |         |                    | SBI-593                               | EC <sub>50</sub>                      | 4.750e-6 (3.924e-6 to 5.750e-6)     | M           |                                   |               |
|          |                                                                                      |         |                    |                                       | Top                                   | 0.4837 (0.4565 to 0.5110)           | Δ Net BRET  |                                   |               |
|          |                                                                                      |         |                    |                                       | Bottom                                | -0.01077 (-0.01999 to -0.001550)    | Δ Net BRET  |                                   |               |
| <b>5</b> | <b>O</b>                                                                             | 3       | NT + 30 μM SBI-553 | EC <sub>50</sub>                      | 5.053e-007 (5.776e-018 to 44201)      | M                                   |             |                                   |               |
|          |                                                                                      |         |                    |                                       | Top                                   | 0.004370 (-0.01697 to 0.02571)      | -Δ Net BRET |                                   |               |
|          |                                                                                      |         |                    |                                       | Bottom                                | 0.0004696 (-0.007560 to 0.008499)   | -Δ Net BRET |                                   |               |
|          |                                                                                      |         |                    | NT + 30 μM SBI-593                    | EC <sub>50</sub>                      | 3.371e-8 (2.240e-008 to 5.074e-008) | M           |                                   |               |
|          |                                                                                      |         |                    |                                       | Top                                   | 0.1924 (0.1799 to 0.2049)           | -Δ Net BRET |                                   |               |
|          |                                                                                      |         |                    |                                       | Bottom                                | -0.007901 (-0.01652 to 0.0007175)   | -Δ Net BRET |                                   |               |
|          |                                                                                      |         |                    | NT + Vehicle                          | EC <sub>50</sub>                      | 1.169e-8 (7.280e-9 to 1.878e-8)     | M           |                                   |               |
|          |                                                                                      |         |                    |                                       | Top                                   | 0.2674 (0.2480 to 0.2869)           | -Δ Net BRET |                                   |               |
|          |                                                                                      |         |                    |                                       | Bottom                                | -0.01092 (-0.02697 to 0.005141)     | -Δ Net BRET |                                   |               |
|          |                                                                                      |         | <b>5</b>           | <b>P</b>                              | 3                                     | SBI-593                             | Slope       | -0.002987 (-0.008509 to 0.002536) | -Δ Net BRET/M |
|          |                                                                                      |         |                    |                                       |                                       |                                     | Y-intercept | -0.01328 (-0.04842 to 0.02187)    | -Δ Net BRET   |

|   |   | expressing HEK293T cells                                                                    |               |                     |                                   |                                       |                                       |             |
|---|---|---------------------------------------------------------------------------------------------|---------------|---------------------|-----------------------------------|---------------------------------------|---------------------------------------|-------------|
| 5 | Q | Effect of SBI-553 vs. SBI-593 on NT (100 nM)-induced activation of G <sub>αq</sub> Shedding | 3             | SBI-553             | EC <sub>50</sub>                  | 6.767e-7 (4.664e-7 to 1.002e-6)       | M                                     |             |
|   |   |                                                                                             |               |                     | Top                               | 19.59 (18.78 to 20.41)                | % AP Shedding                         |             |
|   |   |                                                                                             |               |                     | Bottom                            | -2.984 (-6.236 to -0.3645)            | % AP Shedding                         |             |
|   |   |                                                                                             |               | SBI-593             | EC <sub>50</sub>                  | 4.725e-7 (2.997e-7 to 7.434e-7)       | M                                     |             |
|   |   |                                                                                             |               |                     | Top                               | 19.79 (18.83 to 20.78)                | % AP Shedding                         |             |
|   |   |                                                                                             |               |                     | Bottom                            | 4.654 (3.070 to 6.095)                | % AP Shedding                         |             |
| 5 | R | Effect of SBI-553 vs. SBI-593 on NT (100 nM)-induced mini G <sub>αq</sub> Recruitment       | 3             | SBI-553             | EC <sub>50</sub>                  | 4.767e-008 (3.671e-008 to 6.138e-008) | M                                     |             |
|   |   |                                                                                             |               |                     | Top                               | 0.1764 (0.1663 to 0.1884)             | Δ Net BRET                            |             |
|   |   |                                                                                             |               |                     | Bottom                            | 0.03563 (0.03282 to 0.03839)          | Δ Net BRET                            |             |
|   |   |                                                                                             |               | SBI-593             | EC <sub>50</sub>                  | 3.502e-007 (2.801e-007 to 4.371e-007) | M                                     |             |
|   |   |                                                                                             |               |                     | Top                               | 0.1432 (0.1397 to 0.1468)             | Δ Net BRET                            |             |
|   |   |                                                                                             |               |                     | Bottom                            | 0.05822 (0.05527 to 0.06111)          | Δ Net BRET                            |             |
| 5 | S | Structure image                                                                             |               |                     |                                   |                                       |                                       |             |
| 5 | T | Structure image                                                                             |               |                     |                                   |                                       |                                       |             |
| 5 | U | Structure image                                                                             |               |                     |                                   |                                       |                                       |             |
| 5 | V | Structure image                                                                             |               |                     |                                   |                                       |                                       |             |
| 5 | W | NT + SBI-553 G <sub>αq</sub>                                                                | 3             | Vehicle             | NT EC <sub>50</sub>               | 5.755e-9 (3.560e-9 to 9.303e-9)       | M                                     |             |
|   |   |                                                                                             |               |                     | NT Top                            | 0.3072 (0.2868 to 0.3275)             | -Δ Net BRET                           |             |
|   |   |                                                                                             |               |                     | Bottom                            | -0.003109 (-0.02157 to 0.01535)       | -Δ Net BRET                           |             |
|   |   |                                                                                             |               | 1 μM SBI-553        | NT EC <sub>50</sub>               | 1.784e-8 (7.137e-9 to 4.458e-8)       | M                                     |             |
|   |   |                                                                                             |               |                     | NT Top                            | 0.1883 (0.1634 to 0.2132)             | -Δ Net BRET                           |             |
|   |   |                                                                                             |               |                     | Bottom                            | 0.004988 (-0.01432 to 0.02429)        | -Δ Net BRET                           |             |
|   |   |                                                                                             | 3 μM SBI-553  | NT EC <sub>50</sub> | 2.444e-8 (5.071e-9 to 1.178e-7)   | M                                     |                                       |             |
|   |   |                                                                                             |               | NT Top              | 0.09894 (0.07403 to 0.1239)       | -Δ Net BRET                           |                                       |             |
|   |   |                                                                                             |               | Bottom              | -0.007306 (-0.02556 to 0.01095)   | -Δ Net BRET                           |                                       |             |
|   |   |                                                                                             | 10 μM SBI-553 | NT EC <sub>50</sub> | 3.279e-8 (2.555e-10 to 4.210e-6)  | M                                     |                                       |             |
|   |   |                                                                                             |               | NT Top              | 0.01870 (-0.001856 to 0.03925)    | -Δ Net BRET                           |                                       |             |
|   |   |                                                                                             |               | Bottom              | -0.009091 (-0.02332 to 0.005141)  | -Δ Net BRET                           |                                       |             |
|   |   |                                                                                             | 30 μM SBI-553 | NT EC <sub>50</sub> | 5.053e-7 (5.776e-18 to 44201)     | M                                     |                                       |             |
|   |   |                                                                                             |               | NT Top              | 0.004370 (-0.01697 to 0.02571)    | -Δ Net BRET                           |                                       |             |
|   |   |                                                                                             |               | Bottom              | 0.0004696 (-0.007560 to 0.008499) | -Δ Net BRET                           |                                       |             |
|   |   |                                                                                             |               | 3                   | Vehicle                           | NT EC <sub>50</sub>                   | 4.989e-009 (2.837e-009 to 8.772e-009) | M           |
|   |   |                                                                                             |               |                     |                                   | NT Top                                | 0.2681 (0.2486 to 0.2876)             | -Δ Net BRET |
|   |   |                                                                                             |               |                     |                                   | Bottom                                | 0.009071 (-0.009004 to 0.02715)       | -Δ Net BRET |

|                                   |   |                        |                     |                                       |                     |
|-----------------------------------|---|------------------------|---------------------|---------------------------------------|---------------------|
|                                   |   | 1 $\mu$ M SBI-553      | NT EC <sub>50</sub> | 6.738e-009 (4.318e-009 to 1.052e-008) | M                   |
|                                   |   |                        | NT Top              | 0.2282 (0.2139 to 0.2426)             | - $\Delta$ Net BRET |
|                                   |   |                        | Bottom              | -0.001507 (-0.01421 to 0.01119)       | - $\Delta$ Net BRET |
|                                   |   | 3 $\mu$ M SBI-553      | NT EC <sub>50</sub> | 6.691e-009 (4.546e-009 to 9.848e-009) | M                   |
|                                   |   |                        | NT Top              | 0.2242 (0.2120 to 0.2364)             | - $\Delta$ Net BRET |
|                                   |   |                        | Bottom              | -0.0009451 (-0.01175 to 0.009864)     | - $\Delta$ Net BRET |
|                                   |   | 10 $\mu$ M SBI-553     | NT EC <sub>50</sub> | 5.301e-009 (3.713e-009 to 7.568e-009) | M                   |
|                                   |   |                        | NT Top              | 0.2205 (0.2106 to 0.2305)             | - $\Delta$ Net BRET |
|                                   |   |                        | Bottom              | 0.01236 (0.003189 to 0.02153)         | - $\Delta$ Net BRET |
|                                   |   | 30 $\mu$ M SBI-553     | NT EC <sub>50</sub> | 7.585e-009 (4.907e-009 to 1.172e-008) | M                   |
|                                   |   |                        | NT Top              | 0.2159 (0.2055 to 0.2264)             | - $\Delta$ Net BRET |
|                                   |   |                        | Bottom              | 0.04686 (0.03771 to 0.05601)          | - $\Delta$ Net BRET |
| NT + SBI-553<br>G <sub>o</sub> oA | 3 | Vehicle                | EC <sub>50</sub>    | 1.315e-008 (9.775e-009 to 1.769e-008) | M                   |
|                                   |   |                        | Top                 | 0.2966 (0.2833 to 0.3099)             | - $\Delta$ Net BRET |
|                                   |   |                        | Bottom              | -0.006282 (-0.01708 to 0.004518)      | - $\Delta$ Net BRET |
|                                   |   | 1 $\mu$ M SBI-0654553  | EC <sub>50</sub>    | 1.450e-008 (1.091e-008 to 1.927e-008) | M                   |
|                                   |   |                        | Top                 | 0.2735 (0.2622 to 0.2849)             | - $\Delta$ Net BRET |
|                                   |   |                        | Bottom              | 0.004023 (-0.005073 to 0.01312)       | - $\Delta$ Net BRET |
|                                   |   | 3 $\mu$ M SBI-0654553  | EC <sub>50</sub>    | 1.252e-008 (9.185e-009 to 1.706e-008) | M                   |
|                                   |   |                        | Top                 | 0.2826 (0.2704 to 0.2947)             | - $\Delta$ Net BRET |
|                                   |   |                        | Bottom              | 0.01642 (0.006461 to 0.02638)         | - $\Delta$ Net BRET |
|                                   |   | 10 $\mu$ M SBI-0654553 | EC <sub>50</sub>    | 1.468e-008 (9.237e-009 to 2.332e-008) | M                   |
|                                   |   |                        | Top                 | 0.2868 (0.2716 to 0.3021)             | - $\Delta$ Net BRET |
|                                   |   |                        | Bottom              | 0.06481 (0.05263 to 0.07700)          | - $\Delta$ Net BRET |
|                                   |   | 30 $\mu$ M SBI-0654553 | EC <sub>50</sub>    | 1.385e-008 (8.069e-009 to 2.377e-008) | M                   |
|                                   |   |                        | Top                 | 0.2802 (0.2671 to 0.2932)             | - $\Delta$ Net BRET |
|                                   |   |                        | Bottom              | 0.1171 (0.1066 to 0.1276)             | - $\Delta$ Net BRET |
| NT + SBI-553<br>G <sub>o</sub> 12 | 3 | Vehicle                | EC <sub>50</sub>    | 1.877e-008 (1.093e-008 to 3.222e-008) | M                   |
|                                   |   |                        | Top                 | 0.3035 (0.2796 to 0.3274)             | - $\Delta$ Net BRET |
|                                   |   |                        | Bottom              | 0.005665 (-0.01269 to 0.02402)        | - $\Delta$ Net BRET |
|                                   |   | 1 $\mu$ M SBI-0654553  | EC <sub>50</sub>    | 8.984e-009 (5.167e-009 to 1.562e-008) | M                   |
|                                   |   |                        | Top                 | 0.2976 (0.2746 to 0.3206)             | - $\Delta$ Net BRET |
|                                   |   |                        | Bottom              | 0.01100 (-0.008638 to 0.03064)        | - $\Delta$ Net BRET |
|                                   |   | 3 $\mu$ M SBI-0654553  | EC <sub>50</sub>    | 6.201e-009 (3.266e-009 to 1.177e-008) | M                   |
|                                   |   |                        | Top                 | 0.2988 (0.2755 to 0.3222)             | - $\Delta$ Net BRET |
|                                   |   |                        | Bottom              | 0.03520 (0.01424 to 0.05617)          | - $\Delta$ Net BRET |

|                    |   |                        |                  |                                       |                     |
|--------------------|---|------------------------|------------------|---------------------------------------|---------------------|
|                    |   | 10 $\mu$ M SBI-0654553 | EC <sub>50</sub> | 7.388e-009 (2.891e-009 to 1.888e-008) | M                   |
|                    |   |                        | Top              | 0.2954 (0.2653 to 0.3255)             | - $\Delta$ Net BRET |
|                    |   |                        | Bottom           | 0.06917 (0.04278 to 0.09555)          | - $\Delta$ Net BRET |
|                    |   | 30 $\mu$ M SBI-0654553 | EC <sub>50</sub> | 9.441e-009 (2.080e-009 to 4.285e-008) | M                   |
|                    |   |                        | Top              | 0.2875 (0.2532 to 0.3218)             | - $\Delta$ Net BRET |
|                    |   |                        | Bottom           | 0.1320 (0.1029 to 0.1611)             | - $\Delta$ Net BRET |
| NT + SBI-553       | 3 | Vehicle                | EC <sub>50</sub> | 1.462e-008 (1.119e-008 to 1.911e-008) | M                   |
| $\beta$ -arrestin2 |   |                        | Top              | 0.5629 (0.5404 to 0.5853)             | $\Delta$ Net BRET   |
|                    |   |                        | Bottom           | -0.001865 (-0.01979 to 0.01606)       | $\Delta$ Net BRET   |
|                    |   | 1 $\mu$ M SBI-0647342  | EC <sub>50</sub> | 1.381e-008 (1.016e-008 to 1.878e-008) | M                   |
|                    |   |                        | Top              | 0.6212 (0.5937 to 0.6487)             | $\Delta$ Net BRET   |
|                    |   |                        | Bottom           | 0.01863 (-0.003501 to 0.04076)        | $\Delta$ Net BRET   |
|                    |   | 3 $\mu$ M SBI-0647342  | EC <sub>50</sub> | 1.486e-008 (1.036e-008 to 2.130e-008) | M                   |
|                    |   |                        | Top              | 0.6242 (0.5960 to 0.6523)             | $\Delta$ Net BRET   |
|                    |   |                        | Bottom           | 0.09722 (0.07477 to 0.1197)           | $\Delta$ Net BRET   |
|                    |   | 10 $\mu$ M SBI-0647342 | EC <sub>50</sub> | 2.135e-008 (1.248e-008 to 3.651e-008) | M                   |
|                    |   |                        | Top              | 0.6198 (0.5939 to 0.6456)             | $\Delta$ Net BRET   |
|                    |   |                        | Bottom           | 0.2960 (0.2766 to 0.3154)             | $\Delta$ Net BRET   |
|                    |   | 30 $\mu$ M SBI-0647342 | EC <sub>50</sub> | 2.337e-008 (9.356e-009 to 5.837e-008) | M                   |
|                    |   |                        | Top              | 0.6376 (0.6188 to 0.6564)             | $\Delta$ Net BRET   |
|                    |   |                        | Bottom           | 0.4998 (0.4859 to 0.5137)             | $\Delta$ Net BRET   |
| NT + SBI-342       | 3 | Vehicle                | EC <sub>50</sub> | 4.336e-009 (2.782e-009 to 6.759e-009) | M                   |
| G $\alpha$ q       |   |                        | Top              | 0.2824 (0.2652 to 0.2997)             | - $\Delta$ Net BRET |
|                    |   |                        | Bottom           | -0.02626 (-0.05017 to -0.002348)      | - $\Delta$ Net BRET |
|                    |   | 1 $\mu$ M SBI-0647342  | EC <sub>50</sub> | 8.881e-009 (5.039e-009 to 1.565e-008) | M                   |
|                    |   |                        | Top              | 0.2798 (0.2548 to 0.3047)             | - $\Delta$ Net BRET |
|                    |   |                        | Bottom           | -0.02419 (-0.04554 to -0.002847)      | - $\Delta$ Net BRET |
|                    |   | 3 $\mu$ M SBI-0647342  | EC <sub>50</sub> | 1.233e-008 (7.876e-009 to 1.931e-008) | M                   |
|                    |   |                        | Top              | 0.2555 (0.2367 to 0.2743)             | - $\Delta$ Net BRET |
|                    |   |                        | Bottom           | -0.02851 (-0.04393 to -0.01309)       | - $\Delta$ Net BRET |
|                    |   | 10 $\mu$ M SBI-0647342 | EC <sub>50</sub> | 2.304e-008 (1.294e-008 to 4.102e-008) | M                   |
|                    |   |                        | Top              | 0.1846 (0.1665 to 0.2028)             | - $\Delta$ Net BRET |
|                    |   |                        | Bottom           | -0.02695 (-0.04041 to -0.01350)       | - $\Delta$ Net BRET |
|                    |   | 30 $\mu$ M SBI-0647342 | EC <sub>50</sub> | 2.897e-008 (1.148e-008 to 7.310e-008) | M                   |
|                    |   |                        | Top              | 0.08891 (0.07448 to 0.1033)           | - $\Delta$ Net BRET |
|                    |   |                        | Bottom           | -0.01462 (-0.02485 to -0.004380)      | - $\Delta$ Net BRET |



|                                       |                   |                  |                  |                                       |                                       |             |
|---------------------------------------|-------------------|------------------|------------------|---------------------------------------|---------------------------------------|-------------|
| NT + SBI-342<br><br>G <sub>β</sub> i1 | 3                 | 0 μM SBI-0647342 | EC <sub>50</sub> | 2.202e-009 (1.282e-009 to 3.780e-009) | M                                     |             |
|                                       |                   |                  | Top              | 0.2639 (0.2458 to 0.2821)             | -Δ Net BRET                           |             |
|                                       |                   |                  | Bottom           | -0.007692 (-0.02698 to 0.01159)       | -Δ Net BRET                           |             |
|                                       | 1 μM SBI-0647342  | 3                | 0 μM SBI-0647342 | EC <sub>50</sub>                      | 5.887e-009 (4.540e-009 to 7.634e-009) | M           |
|                                       |                   |                  |                  | Top                                   | 0.2245 (0.2165 to 0.2325)             | -Δ Net BRET |
|                                       |                   |                  |                  | Bottom                                | 0.0009526 (-0.006248 to 0.008153)     | -Δ Net BRET |
|                                       | 3 μM SBI-0647342  | 3                | 0 μM SBI-0647342 | EC <sub>50</sub>                      | 8.005e-009 (6.081e-009 to 1.054e-008) | M           |
|                                       |                   |                  |                  | Top                                   | 0.2115 (0.2027 to 0.2203)             | -Δ Net BRET |
|                                       |                   |                  |                  | Bottom                                | -0.01253 (-0.02017 to -0.004879)      | -Δ Net BRET |
|                                       | 10 μM SBI-0647342 | 3                | 0 μM SBI-0647342 | EC <sub>50</sub>                      | 1.154e-008 (8.985e-009 to 1.483e-008) | M           |
|                                       |                   |                  |                  | Top                                   | 0.1870 (0.1798 to 0.1942)             | -Δ Net BRET |
|                                       |                   |                  |                  | Bottom                                | -0.008602 (-0.01458 to -0.002628)     | -Δ Net BRET |
|                                       | 30 μM SBI-0647342 | 3                | 0 μM SBI-0647342 | EC <sub>50</sub>                      | 8.967e-009 (5.453e-009 to 1.474e-008) | M           |
|                                       |                   |                  |                  | Top                                   | 0.1774 (0.1651 to 0.1897)             | -Δ Net BRET |
|                                       |                   |                  |                  | Bottom                                | 0.006582 (-0.003943 to 0.01711)       | -Δ Net BRET |
| NT + SBI-342<br><br>G <sub>β</sub> oA | 3                 | 0 μM SBI-0647342 | EC <sub>50</sub> | 8.244e-009 (5.406e-009 to 1.257e-008) | M                                     |             |
|                                       |                   |                  | Top              | 0.2044 (0.1926 to 0.2162)             | -Δ Net BRET                           |             |
|                                       |                   |                  | Bottom           | 0.009921 (-0.0002703 to 0.02011)      | -Δ Net BRET                           |             |
|                                       | 1 μM SBI-0647342  | 3                | 0 μM SBI-0647342 | EC <sub>50</sub>                      | 2.045e-008 (1.183e-008 to 3.534e-008) | M           |
|                                       |                   |                  |                  | Top                                   | 0.1749 (0.1608 to 0.1890)             | -Δ Net BRET |
|                                       |                   |                  |                  | Bottom                                | 0.001402 (-0.009271 to 0.01208)       | -Δ Net BRET |
|                                       | 3 μM SBI-0647342  | 3                | 0 μM SBI-0647342 | EC <sub>50</sub>                      | 1.886e-008 (1.050e-008 to 3.388e-008) | M           |
|                                       |                   |                  |                  | Top                                   | 0.1517 (0.1379 to 0.1655)             | -Δ Net BRET |
|                                       |                   |                  |                  | Bottom                                | -0.006902 (-0.01749 to 0.003683)      | -Δ Net BRET |
|                                       | 10 μM SBI-0647342 | 3                | 0 μM SBI-0647342 | EC <sub>50</sub>                      | 1.870e-008 (1.039e-008 to 3.365e-008) | M           |
|                                       |                   |                  |                  | Top                                   | 0.1234 (0.1123 to 0.1345)             | -Δ Net BRET |
|                                       |                   |                  |                  | Bottom                                | -0.003635 (-0.01215 to 0.004879)      | -Δ Net BRET |
|                                       | 30 μM SBI-0647342 | 3                | 0 μM SBI-0647342 | EC <sub>50</sub>                      | 2.175e-008 (8.085e-009 to 5.850e-008) | M           |
|                                       |                   |                  |                  | Top                                   | 0.1125 (0.09606 to 0.1289)            | -Δ Net BRET |
|                                       |                   |                  |                  | Bottom                                | 0.0007274 (-0.01158 to 0.01303)       | -Δ Net BRET |
| NT + SBI-342<br><br>G <sub>β</sub> 12 | 3                 | 0 μM SBI-0647342 | EC <sub>50</sub> | 6.205e-009 (2.552e-009 to 1.436e-008) | M                                     |             |
|                                       |                   |                  | Top              | 0.2614 (0.2310 to 0.2968)             | -Δ Net BRET                           |             |
|                                       |                   |                  | Bottom           | -0.006051 (-0.03728 to 0.02223)       | -Δ Net BRET                           |             |
|                                       | 1 μM SBI-0647342  | 3                | 0 μM SBI-0647342 | EC <sub>50</sub>                      | 9.411e-009 (3.416e-009 to 2.429e-008) | M           |
|                                       |                   |                  |                  | Top                                   | 0.2509 (0.2162 to 0.2932)             | -Δ Net BRET |
|                                       |                   |                  |                  | Bottom                                | 0.01205 (-0.02269 to 0.04264)         | -Δ Net BRET |

|                    |   |                        |                  |                                       |                     |
|--------------------|---|------------------------|------------------|---------------------------------------|---------------------|
|                    |   | 3 $\mu$ M SBI-0647342  | EC <sub>50</sub> | 1.116e-008 (3.928e-009 to 3.402e-008) | M                   |
|                    |   |                        | Top              | 0.2545 (0.2162 to 0.3092)             | - $\Delta$ Net BRET |
|                    |   |                        | Bottom           | -0.004815 (-0.04246 to 0.02680)       | - $\Delta$ Net BRET |
|                    |   | 10 $\mu$ M SBI-0647342 | EC <sub>50</sub> | 1.123e-008 (3.652e-009 to 3.583e-008) | M                   |
|                    |   |                        | Top              | 0.2343 (0.1971 to 0.2875)             | - $\Delta$ Net BRET |
|                    |   |                        | Bottom           | -0.01150 (-0.04825 to 0.01963)        | - $\Delta$ Net BRET |
|                    |   | 30 $\mu$ M SBI-0647342 | EC <sub>50</sub> | 1.012e-008 (4.937e-009 to 2.142e-008) | M                   |
|                    |   |                        | Top              | 0.2368 (0.2131 to 0.2675)             | - $\Delta$ Net BRET |
|                    |   |                        | Bottom           | -0.001556 (-0.02374 to 0.01811)       | - $\Delta$ Net BRET |
| NT + SBI-342       | 3 | 0 $\mu$ M SBI-0647342  | EC <sub>50</sub> | 8.855e-009 (6.716e-009 to 1.167e-008) | M                   |
| $\beta$ -arrestin2 |   |                        | Top              | 0.6037 (0.5794 to 0.6280)             | $\Delta$ Net BRET   |
|                    |   |                        | Bottom           | -0.003028 (-0.02381 to 0.01776)       | $\Delta$ Net BRET   |
|                    |   | 1 $\mu$ M SBI-0647342  | EC <sub>50</sub> | 8.770e-009 (6.397e-009 to 1.202e-008) | M                   |
|                    |   |                        | Top              | 0.6080 (0.5834 to 0.6327)             | $\Delta$ Net BRET   |
|                    |   |                        | Bottom           | 0.06818 (0.04707 to 0.08930)          | $\Delta$ Net BRET   |
|                    |   | 3 $\mu$ M SBI-0647342  | EC <sub>50</sub> | 5.589e-009 (3.863e-009 to 8.086e-009) | M                   |
|                    |   |                        | Top              | 0.6735 (0.6497 to 0.6973)             | $\Delta$ Net BRET   |
|                    |   |                        | Bottom           | 0.1995 (0.1778 to 0.2212)             | $\Delta$ Net BRET   |
|                    |   | 10 $\mu$ M SBI-0647342 | EC <sub>50</sub> | 5.141e-009 (2.896e-009 to 9.126e-009) | M                   |
|                    |   |                        | Top              | 0.7051 (0.6845 to 0.7257)             | $\Delta$ Net BRET   |
|                    |   |                        | Bottom           | 0.4376 (0.4186 to 0.4566)             | $\Delta$ Net BRET   |
|                    |   | 30 $\mu$ M SBI-0647342 | EC <sub>50</sub> | 9.188e-009 (1.757e-009 to 4.806e-008) | M                   |
|                    |   |                        | Top              | 0.7913 (0.7652 to 0.8175)             | $\Delta$ Net BRET   |
|                    |   |                        | Bottom           | 0.6825 (0.6602 to 0.7048)             | $\Delta$ Net BRET   |
| NT + SBI-593       | 3 | 0 $\mu$ M SBI-0646593  | EC <sub>50</sub> | 1.169e-008 (7.280e-009 to 1.878e-008) | M                   |
| G <sub>q</sub>     |   |                        | Top              | 0.2674 (0.2480 to 0.2869)             | - $\Delta$ Net BRET |
|                    |   |                        | Bottom           | -0.01092 (-0.02697 to 0.005141)       | - $\Delta$ Net BRET |
|                    |   | 1 $\mu$ M SBI-0646593  | EC <sub>50</sub> | 1.800e-008 (1.164e-008 to 2.784e-008) | M                   |
|                    |   |                        | Top              | 0.2692 (0.2508 to 0.2876)             | - $\Delta$ Net BRET |
|                    |   |                        | Bottom           | -0.01557 (-0.02982 to -0.001323)      | - $\Delta$ Net BRET |
|                    |   | 3 $\mu$ M SBI-0646593  | EC <sub>50</sub> | 2.675e-008 (1.781e-008 to 4.017e-008) | M                   |
|                    |   |                        | Top              | 0.2469 (0.2306 to 0.2633)             | - $\Delta$ Net BRET |
|                    |   |                        | Bottom           | -0.02159 (-0.03337 to -0.009811)      | - $\Delta$ Net BRET |
|                    |   | 10 $\mu$ M SBI-0646593 | EC <sub>50</sub> | 3.121e-008 (2.179e-008 to 4.468e-008) | M                   |
|                    |   |                        | Top              | 0.2039 (0.1919 to 0.2158)             | - $\Delta$ Net BRET |
|                    |   |                        | Bottom           | -0.01599 (-0.02435 to -0.007625)      | - $\Delta$ Net BRET |

|                   |   |                        |                        |                  |                                       |                     |
|-------------------|---|------------------------|------------------------|------------------|---------------------------------------|---------------------|
|                   |   |                        | 30 $\mu$ M SBI-0646593 | EC <sub>50</sub> | 3.371e-008 (2.240e-008 to 5.074e-008) | M                   |
|                   |   |                        |                        | Top              | 0.1924 (0.1799 to 0.2049)             | - $\Delta$ Net BRET |
|                   |   |                        |                        | Bottom           | -0.007901 (-0.01652 to 0.0007175)     | - $\Delta$ Net BRET |
| NT + SBI-593      | 3 | 0 $\mu$ M SBI-0646593  |                        | EC <sub>50</sub> | 1.063e-008 (7.131e-009 to 1.583e-008) | M                   |
| G <sub>q</sub> i1 |   |                        |                        | Top              | 0.2613 (0.2457 to 0.2770)             | - $\Delta$ Net BRET |
|                   |   |                        |                        | Bottom           | -0.006159 (-0.01926 to 0.006939)      | - $\Delta$ Net BRET |
|                   |   | 1 $\mu$ M SBI-0646593  |                        | EC <sub>50</sub> | 1.147e-008 (8.229e-009 to 1.598e-008) | M                   |
|                   |   |                        |                        | Top              | 0.2252 (0.2131 to 0.2374)             | - $\Delta$ Net BRET |
|                   |   |                        |                        | Bottom           | -0.02262 (-0.03266 to -0.01259)       | - $\Delta$ Net BRET |
|                   |   | 3 $\mu$ M SBI-0646593  |                        | EC <sub>50</sub> | 1.386e-008 (9.491e-009 to 2.025e-008) | M                   |
|                   |   |                        |                        | Top              | 0.2042 (0.1911 to 0.2172)             | - $\Delta$ Net BRET |
|                   |   |                        |                        | Bottom           | -0.02781 (-0.03831 to -0.01732)       | - $\Delta$ Net BRET |
|                   |   | 10 $\mu$ M SBI-0646593 |                        | EC <sub>50</sub> | 1.561e-008 (1.086e-008 to 2.244e-008) | M                   |
|                   |   |                        |                        | Top              | 0.1951 (0.1839 to 0.2064)             | - $\Delta$ Net BRET |
|                   |   |                        |                        | Bottom           | -0.01407 (-0.02298 to -0.005152)      | - $\Delta$ Net BRET |
|                   |   | 30 $\mu$ M SBI-0646593 |                        | EC <sub>50</sub> | 1.466e-008 (9.419e-009 to 2.281e-008) | M                   |
|                   |   |                        |                        | Top              | 0.1933 (0.1806 to 0.2059)             | - $\Delta$ Net BRET |
|                   |   |                        |                        | Bottom           | 0.0003866 (-0.009722 to 0.01050)      | - $\Delta$ Net BRET |
| NT + SBI-593      | 3 | 0 $\mu$ M SBI-0646593  |                        | EC <sub>50</sub> | 2.397e-008 (1.583e-008 to 3.630e-008) | M                   |
| G <sub>q</sub> oA |   |                        |                        | Top              | 0.2139 (0.2006 to 0.2271)             | - $\Delta$ Net BRET |
|                   |   |                        |                        | Bottom           | -6.091e-008 (-0.009725 to 0.009724)   | - $\Delta$ Net BRET |
|                   |   | 1 $\mu$ M SBI-0646593  |                        | EC <sub>50</sub> | 3.669e-008 (2.512e-008 to 5.358e-008) | M                   |
|                   |   |                        |                        | Top              | 0.2029 (0.1910 to 0.2147)             | - $\Delta$ Net BRET |
|                   |   |                        |                        | Bottom           | 3.090e-006 (-0.008040 to 0.008047)    | - $\Delta$ Net BRET |
|                   |   | 3 $\mu$ M SBI-0646593  |                        | EC <sub>50</sub> | 3.131e-008 (2.015e-008 to 4.865e-008) | M                   |
|                   |   |                        |                        | Top              | 0.2122 (0.1980 to 0.2263)             | - $\Delta$ Net BRET |
|                   |   |                        |                        | Bottom           | 2.343e-007 (-0.009906 to 0.009906)    | - $\Delta$ Net BRET |
|                   |   | 10 $\mu$ M SBI-0646593 |                        | EC <sub>50</sub> | 2.928e-008 (1.961e-008 to 4.373e-008) | M                   |
|                   |   |                        |                        | Top              | 0.2109 (0.1982 to 0.2237)             | - $\Delta$ Net BRET |
|                   |   |                        |                        | Bottom           | 2.035e-006 (-0.009024 to 0.009028)    | - $\Delta$ Net BRET |
|                   |   | 30 $\mu$ M SBI-0646593 |                        | EC <sub>50</sub> | 1.967e-008 (9.587e-009 to 4.036e-008) | M                   |
|                   |   |                        |                        | Top              | 0.1915 (0.1711 to 0.2120)             | - $\Delta$ Net BRET |
|                   |   |                        |                        | Bottom           | 2.619e-006 (-0.01557 to 0.01558)      | - $\Delta$ Net BRET |
| NT + SBI-593      | 3 | 0 $\mu$ M SBI-0646593  |                        | EC <sub>50</sub> | 1.847e-008 (1.248e-008 to 2.736e-008) | M                   |
| G <sub>q</sub> 12 |   |                        |                        | Top              | 0.1974 (0.1856 to 0.2091)             | - $\Delta$ Net BRET |
|                   |   |                        |                        | Bottom           | -0.004860 (-0.01394 to 0.004216)      | - $\Delta$ Net BRET |

|          |                    |                                                                            |                        |                  |                                       |                     |
|----------|--------------------|----------------------------------------------------------------------------|------------------------|------------------|---------------------------------------|---------------------|
|          |                    |                                                                            | 1 $\mu$ M SBI-0646593  | EC <sub>50</sub> | 2.191e-008 (1.512e-008 to 3.176e-008) | M                   |
|          |                    |                                                                            |                        | Top              | 0.1967 (0.1846 to 0.2088)             | - $\Delta$ Net BRET |
|          |                    |                                                                            |                        | Bottom           | -0.02225 (-0.03129 to -0.01322)       | - $\Delta$ Net BRET |
|          |                    |                                                                            | 3 $\mu$ M SBI-0646593  | EC <sub>50</sub> | 1.670e-008 (1.126e-008 to 2.476e-008) | M                   |
|          |                    |                                                                            |                        | Top              | 0.1927 (0.1797 to 0.2058)             | - $\Delta$ Net BRET |
|          |                    |                                                                            |                        | Bottom           | -0.03068 (-0.04091 to -0.02045)       | - $\Delta$ Net BRET |
|          |                    |                                                                            | 10 $\mu$ M SBI-0646593 | EC <sub>50</sub> | 1.797e-008 (1.254e-008 to 2.576e-008) | M                   |
|          |                    |                                                                            |                        | Top              | 0.1970 (0.1852 to 0.2087)             | - $\Delta$ Net BRET |
|          |                    |                                                                            |                        | Bottom           | -0.02309 (-0.03219 to -0.01399)       | - $\Delta$ Net BRET |
|          |                    |                                                                            | 30 $\mu$ M SBI-0646593 | EC <sub>50</sub> | 1.741e-008 (1.079e-008 to 2.809e-008) | M                   |
|          |                    |                                                                            |                        | Top              | 0.2002 (0.1863 to 0.2142)             | - $\Delta$ Net BRET |
|          |                    |                                                                            |                        | Bottom           | 0.004165 (-0.006658 to 0.01499)       | - $\Delta$ Net BRET |
|          | NT + SBI-593       | 3                                                                          | 0 $\mu$ M SBI-0646593  | EC <sub>50</sub> | 1.906e-008 (1.138e-008 to 3.192e-008) | M                   |
|          | $\beta$ -arrestin2 |                                                                            |                        | Top              | 0.4671 (0.4319 to 0.5022)             | $\Delta$ Net BRET   |
|          |                    |                                                                            |                        | Bottom           | 0.008224 (-0.01870 to 0.03515)        | $\Delta$ Net BRET   |
|          |                    |                                                                            | 1 $\mu$ M SBI-0646593  | EC <sub>50</sub> | 1.869e-008 (1.043e-008 to 3.349e-008) | M                   |
|          |                    |                                                                            |                        | Top              | 0.4973 (0.4596 to 0.5349)             | $\Delta$ Net BRET   |
|          |                    |                                                                            |                        | Bottom           | 0.06263 (0.03371 to 0.09156)          | $\Delta$ Net BRET   |
|          |                    |                                                                            | 3 $\mu$ M SBI-0646593  | EC <sub>50</sub> | 1.995e-008 (8.343e-009 to 4.772e-008) | M                   |
|          |                    |                                                                            |                        | Top              | 0.5570 (0.5059 to 0.6081)             | $\Delta$ Net BRET   |
|          |                    |                                                                            |                        | Bottom           | 0.1623 (0.1234 to 0.2011)             | $\Delta$ Net BRET   |
|          |                    |                                                                            | 10 $\mu$ M SBI-0646593 | EC <sub>50</sub> | 1.838e-008 (5.997e-009 to 5.636e-008) | M                   |
|          |                    |                                                                            |                        | Top              | 0.6422 (0.5945 to 0.6898)             | $\Delta$ Net BRET   |
|          |                    |                                                                            |                        | Bottom           | 0.3548 (0.3173 to 0.3922)             | $\Delta$ Net BRET   |
|          |                    |                                                                            | 30 $\mu$ M SBI-0646593 | EC <sub>50</sub> | 1.413e-008 (3.649e-009 to 5.471e-008) | M                   |
|          |                    |                                                                            |                        | Top              | 0.6318 (0.5825 to 0.6810)             | $\Delta$ Net BRET   |
|          |                    |                                                                            |                        | Bottom           | 0.3858 (0.3455 to 0.4262)             | $\Delta$ Net BRET   |
| <b>5</b> | <b>X</b>           | Radar plot summary of G protein activation by SBI-553, SBI-342 and SBI-593 |                        |                  |                                       |                     |
| <b>5</b> | <b>Y</b>           | Cartoon of G protein activation by SBI-553, SBI-342 and SBI-593            |                        |                  |                                       |                     |

CI, confidence interval; NT, neurotensin; SBI-553, SBI-0654553; M, molar; EC<sub>50</sub>, half-maximal effective concentration; IC<sub>50</sub>, half-maximal inhibitory concentration; NA, not applicable, ND, not defined

**Table S6. Curve parameters and statistical comparisons presented in Figure 6 – Supporting Figure 6.**

| Fig | Panel | Description                                                                                 | Statistical Test                                                                | F Statistics                                                                                                                                    | Multiple Comparisons                                | N    | Condition | Parameter        | Mean (95% CI)                         | Units      |
|-----|-------|---------------------------------------------------------------------------------------------|---------------------------------------------------------------------------------|-------------------------------------------------------------------------------------------------------------------------------------------------|-----------------------------------------------------|------|-----------|------------------|---------------------------------------|------------|
| 6   | A     | Experimental timeline of PD149163 (i.p.)-induced hypothermia studies                        |                                                                                 |                                                                                                                                                 |                                                     |      |           |                  |                                       |            |
| 6   | B     | PD149163-induced Hypothermia in WT mice – Time Course of Body Temperature                   | Two-way repeated measures ANOVA followed by Dunnett's multiple comparisons test | $F_{Time} (3.015, 132.0) = 64.22, p < 0.0001$<br>$F_{Treatment} (3, 46) = 67.62, p < 0.0001$<br>$F_{Interaction} (30, 438) = 23.03, p < 0.0001$ | *p<0.05, **p<0.01, ***p <0.001, PD149163 vs Vehicle | 9-17 |           |                  |                                       |            |
|     |       | PD149163-induced Hypothermia in NTSR1 <sup>-/-</sup> mice – Time Course of Body Temperature | Two-way repeated measures ANOVA                                                 | $F_{Time} (3, 26) = 2.728$<br>$F_{Treatment} (4.669, 121.4) = 3.961$<br>$F_{Interaction} (24, 208) = 2.689$                                     | N/A                                                 | 6-8  |           |                  |                                       |            |
| 6   | C     | PD149163-induced Human NTSR1 G <sub>αq</sub> Activation                                     |                                                                                 |                                                                                                                                                 |                                                     | 3    | SBI-553   | IC <sub>50</sub> | 2.072e-015 (ND)                       | M          |
|     |       |                                                                                             |                                                                                 |                                                                                                                                                 |                                                     |      |           | Top              | 12.90 (ND)                            | Δ Net BRET |
|     |       |                                                                                             |                                                                                 |                                                                                                                                                 |                                                     |      |           | Bottom           | 0.02533 (0.007351 to 0.04034)         | Δ Net BRET |
|     |       |                                                                                             |                                                                                 |                                                                                                                                                 |                                                     | 3    | SBI-593   | IC <sub>50</sub> | 2.161e-007 (ND)                       | M          |
|     |       |                                                                                             |                                                                                 |                                                                                                                                                 |                                                     |      |           | Top              | 0.1474 (ND)                           | Δ Net BRET |
|     |       |                                                                                             |                                                                                 |                                                                                                                                                 |                                                     |      |           | Bottom           | 0.06322 (ND)                          | Δ Net BRET |
| 6   | D     | PD149163-induced Mouse NTSR1 G <sub>αq</sub> Activation                                     |                                                                                 |                                                                                                                                                 |                                                     | 3    | SBI-553   | IC <sub>50</sub> | 4.070e-014 (ND)                       | M          |
|     |       |                                                                                             |                                                                                 |                                                                                                                                                 |                                                     |      |           | Top              | 0.6686 (ND)                           | Δ Net BRET |
|     |       |                                                                                             |                                                                                 |                                                                                                                                                 |                                                     |      |           | Bottom           | 0.002194 (-0.006034 to 0.008608)      | Δ Net BRET |
|     |       |                                                                                             |                                                                                 |                                                                                                                                                 |                                                     | 3    | SBI-593   | IC <sub>50</sub> | 5.072e-007 (2.616e-007 to 8.596e-007) | M          |
|     |       |                                                                                             |                                                                                 |                                                                                                                                                 |                                                     |      |           | Top              | 0.1616 (0.1458 to 0.2396)             | Δ Net BRET |

|          |                                                                                                                                                             |                                                                                                                       |                                                                                                                                                                      |                                                                                                                                                                       |     | Bottom | 0.05582 (0.01734 to 0.06830) | Δ Net BRET |  |
|----------|-------------------------------------------------------------------------------------------------------------------------------------------------------------|-----------------------------------------------------------------------------------------------------------------------|----------------------------------------------------------------------------------------------------------------------------------------------------------------------|-----------------------------------------------------------------------------------------------------------------------------------------------------------------------|-----|--------|------------------------------|------------|--|
| <b>6</b> | <b>E</b>                                                                                                                                                    | Experimental timeline of studies evaluating the effect of SBI compounds (i.p.) on PD149163 (i.p.)-induced hypothermia |                                                                                                                                                                      |                                                                                                                                                                       |     |        |                              |            |  |
| <b>6</b> | <b>F</b>                                                                                                                                                    | SBI-553 Attenuation of PD149163-induced Hypothermia – Time Course of Body Temperature                                 | Two-way repeated measures ANOVA, Time 30-300 min post PD149163 treatment                                                                                             | $F_{\text{Time}} (1.156, 16.19) = 28.50, p < 0.0001$<br>$F_{\text{Treatment}} (1, 14) = 4.671, p = 0.0485$<br>$F_{\text{Interaction}} (9, 126) = 2.163, p = 0.0289$   | N/A | 8      |                              |            |  |
| <b>G</b> |                                                                                                                                                             | SBI-593 Attenuation of PD149163-induced Hypothermia – Time Course of Body Temperature                                 | Two-way repeated measures ANOVA, Time 30-300 min post PD149163 treatment                                                                                             | $F_{\text{Time}} (2.445, 34.23) = 129.3, p < 0.0001$<br>$F_{\text{Treatment}} (1, 14) = 1.817, p = 0.1990$<br>$F_{\text{Interaction}} (14, 196) = 0.9650, p = 0.4907$ | N/A | 8      |                              |            |  |
| <b>H</b> | Illustration showing location of intra-nucleus accumbens cannula placement                                                                                  |                                                                                                                       |                                                                                                                                                                      |                                                                                                                                                                       |     |        |                              |            |  |
| <b>I</b> | Experimental timeline of PD149163 (intra-nucleus accumbens)-induced hypothermia studies                                                                     |                                                                                                                       |                                                                                                                                                                      |                                                                                                                                                                       |     |        |                              |            |  |
| <b>J</b> | Illustration of ink-verified intra-nucleus accumbens cannula placements for mice in experimental panel K                                                    |                                                                                                                       |                                                                                                                                                                      |                                                                                                                                                                       |     |        |                              |            |  |
| <b>K</b> | PD149163-induced Hypothermia in WT mice – Body Temperature Pre and Post Intra-NAc Treatment                                                                 | Two-way repeated measures ANOVA                                                                                       | $F_{\text{Time}} (1, 24) = 227.1, p < 0.0001$<br>$F_{\text{Treatment}} (3, 24) = 64.23, p < 0.0001$<br>$F_{\text{Interaction}} (3, 24) = 62.95, p < 0.0001$          | *** $p < 0.001$ , WT Vehicle vs. WT PD149163                                                                                                                          | 8   |        |                              |            |  |
|          | PD149163-induced Hypothermia in NTSR1 <sup>-/-</sup> mice – Body Temperature Pre and Post Intra-NAc Treatment                                               | Two-way repeated measures ANOVA                                                                                       | $F_{\text{Time}} (1, 10) = 2.455$<br>$F_{\text{Treatment}} (1, 10) = 1.609$<br>$F_{\text{Interaction}} (1, 10) = 4.277$                                              | N/A                                                                                                                                                                   | 6   |        |                              |            |  |
| <b>L</b> | Experimental timeline of studies evaluating the effect of SBI compounds (intra-nucleus accumbens) on PD149163 (intra-nucleus accumbens)-induced hypothermia |                                                                                                                       |                                                                                                                                                                      |                                                                                                                                                                       |     |        |                              |            |  |
| <b>M</b> | Illustration of ink-verified intra-nucleus accumbens cannula placements for mice in experimental panel N                                                    |                                                                                                                       |                                                                                                                                                                      |                                                                                                                                                                       |     |        |                              |            |  |
| <b>N</b> | SBI-593 Attenuation of Intra-NAc PD149163-induced Hypothermia – Time Course of Body Temperature                                                             | Two-way repeated measures ANOVA, Time 30-480 min post PD149163 treatment                                              | $F_{\text{Time}} (1.979, 35.62) = 15.88, p < 0.0001$<br>$F_{\text{Treatment}} (2, 19) = 6.298, p = 0.0080$<br>$F_{\text{Interaction}} (16, 144) = 3.909, p < 0.0001$ | * $p < 0.01$ , ** $p < 0.0001$ , SBI-553 vs SBI-593 vs Vehicle                                                                                                        | 6-9 |        |                              |            |  |

|          |                                                                 |                                                                                              |                                             |                                                                       |     |
|----------|-----------------------------------------------------------------|----------------------------------------------------------------------------------------------|---------------------------------------------|-----------------------------------------------------------------------|-----|
| <b>O</b> | Area Under the Curve                                            | One-way nonparametric ANOVA followed by Dunn's multiple comparisons and Kruskal-Wallis tests | Kruskal-Wallis statistic= 6.304, p = 0.0363 | *p = 0.0341, Vehicle vs SBI-553<br><br>p = 0.1897, Vehicle vs SBI-593 | 6-9 |
| <b>P</b> | Complete vs Incomplete Blockade of PD149163-induced Hypothermia | Chi-Square, Two-sided                                                                        | Chi-square, df = 100.8, 1<br>Z = 10.04      | *p<0.0001, SBI-553 vs SBI-593                                         | 6-9 |

One-way ANOVA; Dunnett's multiple comparison test; Kruskal-Wallis test; CI, confidence interval; NT, neurotensin; SBI-553, SBI-0654553; IC<sub>50</sub>, half-maximal inhibitory concentration ND, not defined

**Table S7. Compound identification and curve parameters presented in Supplemental Figure 4.**

| Fig | Compound Number | Compound Name    | Structure                                                                           | Parameter    | Mean (95% CI)    | Units          |              |
|-----|-----------------|------------------|-------------------------------------------------------------------------------------|--------------|------------------|----------------|--------------|
| S4  | 1               | SBI-0654498      | 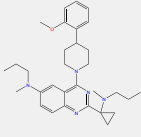   | Gαq          | IC <sub>50</sub> | ~ 0.08349 (ND) | M            |
|     |                 |                  |                                                                                     |              | Bottom           | 0.000          | % Inhibition |
|     |                 |                  |                                                                                     | Gαi1         | IC <sub>50</sub> | ~ 0.2478 (ND)  | M            |
|     |                 |                  |                                                                                     |              | Bottom           | 0.000          | % Inhibition |
|     |                 |                  |                                                                                     | GαoA         | IC <sub>50</sub> | 0.0001010      | M            |
|     |                 |                  |                                                                                     |              | Bottom           | 0.000          | % Inhibition |
|     | Gα12            | IC <sub>50</sub> | ND                                                                                  | M            |                  |                |              |
|     |                 | Bottom           | 0.000                                                                               | % Inhibition |                  |                |              |
|     | β-arrestin 2    | EC <sub>50</sub> | ~ 0.3865 (ND)                                                                       | M            |                  |                |              |
|     |                 | Top              | 107.938                                                                             | % Agonism    |                  |                |              |
| 2   | 2               | SBI-0653810      |    | Gαq          | IC <sub>50</sub> | 2.552e-006     | M            |
|     |                 |                  |                                                                                     |              | Bottom           | 69.362         | % Inhibition |
|     |                 |                  |                                                                                     | Gαi1         | IC <sub>50</sub> | 1.231e-006     | M            |
|     |                 |                  |                                                                                     |              | Bottom           | 31.794         | % Inhibition |
|     |                 |                  |                                                                                     | GαoA         | IC <sub>50</sub> | ND             | M            |
|     |                 |                  |                                                                                     |              | Bottom           | 0.000          | % Inhibition |
|     | Gα12            | IC <sub>50</sub> | ND                                                                                  | M            |                  |                |              |
|     |                 | Bottom           | 0.000                                                                               | % Inhibition |                  |                |              |
|     | β-arrestin 2    | EC <sub>50</sub> | 6.596e-006                                                                          | M            |                  |                |              |
|     |                 | Top              | 105.957                                                                             | % Agonism    |                  |                |              |
| 3   | 3               | SBI-0655884      |   | Gαq          | IC <sub>50</sub> | 6.277e-007     | M            |
|     |                 |                  |                                                                                     |              | Bottom           | 78.481         | % Inhibition |
|     |                 |                  |                                                                                     | Gαi1         | IC <sub>50</sub> | 1.852e-007     | M            |
|     |                 |                  |                                                                                     |              | Bottom           | 29.862         | % Inhibition |
|     |                 |                  |                                                                                     | GαoA         | IC <sub>50</sub> | 2.188e-006     | M            |
|     |                 |                  |                                                                                     |              | Bottom           | -21.482        | % Inhibition |
|     | Gα12            | IC <sub>50</sub> | ND                                                                                  | M            |                  |                |              |
|     |                 | Bottom           | 0.000                                                                               | % Inhibition |                  |                |              |
|     | β-arrestin 2    | EC <sub>50</sub> | 3.371e-006                                                                          | M            |                  |                |              |
|     |                 | Top              | 112.778                                                                             | % Agonism    |                  |                |              |
| 4   | 4               | SBI-0647348      |  | Gαq          | IC <sub>50</sub> | 7.041e-006     | M            |
|     |                 |                  |                                                                                     |              | Bottom           | 94.046         | % Inhibition |
|     |                 |                  |                                                                                     | Gαi1         | IC <sub>50</sub> | 1.143e-006     | M            |
|     |                 |                  |                                                                                     |              | Bottom           | 43.763         | % Inhibition |
|     |                 |                  |                                                                                     | GαoA         | IC <sub>50</sub> | 9.264e-007     | M            |
|     |                 |                  |                                                                                     |              | Bottom           | 0.000          | % Inhibition |
|     | Gα12            | IC <sub>50</sub> | ~ 1.353e-013 (ND)                                                                   | M            |                  |                |              |
|     |                 | Bottom           | 0.000                                                                               | % Inhibition |                  |                |              |
|     | β-arrestin 2    | EC <sub>50</sub> | 6.763e-006                                                                          | M            |                  |                |              |
|     |                 | Top              | 113.437                                                                             | % Agonism    |                  |                |              |
| 5   | 5               | SBI-0654503      |  | Gαq          | IC <sub>50</sub> | 1.021e-005     | M            |
|     |                 |                  |                                                                                     |              | Bottom           | 116.431        | % Inhibition |
|     |                 |                  |                                                                                     | Gαi1         | IC <sub>50</sub> | 3.52e-005      | M            |
|     |                 |                  |                                                                                     |              | Bottom           | 52.913         | % Inhibition |
|     |                 |                  |                                                                                     | GαoA         | IC <sub>50</sub> | ~ 0.03047 (ND) | M            |
|     |                 |                  |                                                                                     |              | Bottom           | 0.000          | % Inhibition |
|     | Gα12            | IC <sub>50</sub> | 8.411e-007                                                                          | M            |                  |                |              |
|     |                 | Bottom           | 0.000                                                                               | % Inhibition |                  |                |              |
|     | β-arrestin 2    | EC <sub>50</sub> | 1.510e-005                                                                          | M            |                  |                |              |



|    |             |                                                                                     |              |                  |                  |                |              |
|----|-------------|-------------------------------------------------------------------------------------|--------------|------------------|------------------|----------------|--------------|
|    |             |                                                                                     |              | Top              | 115.302          | % Agonism      |              |
| 6  | SBI-0656152 | 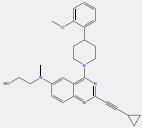   |              | Gαq              | IC <sub>50</sub> | 5.683e-006     | M            |
|    |             |                                                                                     |              |                  | Bottom           | 83.075         | % Inhibition |
|    |             |                                                                                     |              | Gαi1             | IC <sub>50</sub> | 2.09e-006      | M            |
|    |             |                                                                                     |              |                  | Bottom           | 34.615         | % Inhibition |
|    |             |                                                                                     |              | GαoA             | IC <sub>50</sub> | 2.560e-008     | M            |
|    |             |                                                                                     |              |                  | Bottom           | 0.000          | % Inhibition |
|    |             |                                                                                     |              | Gα12             | IC <sub>50</sub> | ND             | M            |
|    | Bottom      | 0.000                                                                               | % Inhibition |                  |                  |                |              |
|    |             |                                                                                     | β-arrestin 2 | EC <sub>50</sub> | 1.305e-005       | M              |              |
|    |             |                                                                                     | Top          | 106.223          | % Agonism        |                |              |
| 7  | SBI-0656154 |    |              | Gαq              | IC <sub>50</sub> | 8.821e-007     | M            |
|    |             |                                                                                     |              |                  | Bottom           | 63.674         | % Inhibition |
|    |             |                                                                                     |              | Gαi1             | IC <sub>50</sub> | 6.51e-008      | M            |
|    |             |                                                                                     |              |                  | Bottom           | 2.900          | % Inhibition |
|    |             |                                                                                     |              | GαoA             | IC <sub>50</sub> | 2.956e-006     | M            |
|    |             |                                                                                     |              |                  | Bottom           | 0.000          | % Inhibition |
|    |             |                                                                                     |              | Gα12             | IC <sub>50</sub> | 2.460e-008     | M            |
|    | Bottom      | 0.000                                                                               | % Inhibition |                  |                  |                |              |
|    |             |                                                                                     | β-arrestin 2 | EC <sub>50</sub> | 1.796e-005       | M              |              |
|    |             |                                                                                     | Top          | 91.881           | % Agonism        |                |              |
| 8  | SBI-0656032 |    |              | Gαq              | IC <sub>50</sub> | 1.17e-005      | M            |
|    |             |                                                                                     |              |                  | Bottom           | 96.304         | % Inhibition |
|    |             |                                                                                     |              | Gαi1             | IC <sub>50</sub> | 9.70e-006      | M            |
|    |             |                                                                                     |              |                  | Bottom           | 41.492         | % Inhibition |
|    |             |                                                                                     |              | GαoA             | IC <sub>50</sub> | 7.474e-009     | M            |
|    |             |                                                                                     |              |                  | Bottom           | 0.000          | % Inhibition |
|    |             |                                                                                     |              | Gα12             | IC <sub>50</sub> | ND             | M            |
|    | Bottom      | 0.000                                                                               | % Inhibition |                  |                  |                |              |
|    |             |                                                                                     | β-arrestin 2 | EC <sub>50</sub> | 4.022e-005       | M              |              |
|    |             |                                                                                     | Top          | 83.462           | % Agonism        |                |              |
| 9  | SBI-0657449 |  |              | Gαq              | IC <sub>50</sub> | ~ 0.02862 (ND) | M            |
|    |             |                                                                                     |              |                  | Bottom           | 33.028         | % Inhibition |
|    |             |                                                                                     |              | Gαi1             | IC <sub>50</sub> | ~ 0.01649 (ND) | M            |
|    |             |                                                                                     |              |                  | Bottom           | 0.000          | % Inhibition |
|    |             |                                                                                     |              | GαoA             | IC <sub>50</sub> | 8.780e-007     | M            |
|    |             |                                                                                     |              |                  | Bottom           | 0.000          | % Inhibition |
|    |             |                                                                                     |              | Gα12             | IC <sub>50</sub> | ND             | M            |
|    | Bottom      | 0.000                                                                               | % Inhibition |                  |                  |                |              |
|    |             |                                                                                     | β-arrestin 2 | EC <sub>50</sub> | 0.0001746        | M              |              |
|    |             |                                                                                     | Top          | 37.132           | % Agonism        |                |              |
| 10 | SBI-0656588 |  |              | Gαq              | IC <sub>50</sub> | ~ 0.03411 (ND) | M            |
|    |             |                                                                                     |              |                  | Bottom           | 32.591         | % Inhibition |
|    |             |                                                                                     |              | Gαi1             | IC <sub>50</sub> | ~ 0.02671 (ND) | M            |
|    |             |                                                                                     |              |                  | Bottom           | 0.000          | % Inhibition |
|    |             |                                                                                     |              | GαoA             | IC <sub>50</sub> | ~ 0.03883 (ND) | M            |
|    |             |                                                                                     |              |                  | Bottom           | 0.000          | % Inhibition |
|    |             |                                                                                     |              | Gα12             | IC <sub>50</sub> | ND             | M            |
|    | Bottom      | 0.000                                                                               | % Inhibition |                  |                  |                |              |
|    |             |                                                                                     | β-arrestin 2 | EC <sub>50</sub> | ~ 0.01559 (ND)   | M              |              |
|    |             |                                                                                     | Top          | 36.578           | % Agonism        |                |              |
| 11 | SBI-0647347 |                                                                                     |              | Gαq              | IC <sub>50</sub> | 1.222e-006     | M            |
|    |             |                                                                                     |              |                  | Bottom           | 103.917        | % Inhibition |
|    |             |                                                                                     |              | Gαi1             | IC <sub>50</sub> | 5.54e-007      | M            |

|    |             |                                                                                     |                   |                  |                   |              |
|----|-------------|-------------------------------------------------------------------------------------|-------------------|------------------|-------------------|--------------|
|    |             | 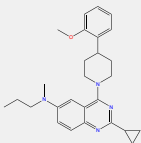   | GaoA              | Bottom           | 40.965            | % Inhibition |
|    |             |                                                                                     |                   | IC <sub>50</sub> | ~ 0.05441 (ND)    | M            |
|    |             |                                                                                     | Gα12              | Bottom           | 0.000             | % Inhibition |
|    |             |                                                                                     |                   | IC <sub>50</sub> | 2.071e-008        | M            |
|    |             |                                                                                     | β-arrestin 2      | Bottom           | 0.000             | % Inhibition |
|    |             |                                                                                     |                   | EC <sub>50</sub> | 2.166e-006        | M            |
|    |             |                                                                                     |                   | Top              | 137.067           | % Agonism    |
| 12 | SBI-0654552 |    | Gαq               | IC <sub>50</sub> | 3.718e-006        | M            |
|    |             |                                                                                     |                   | Bottom           | 78.189            | % Inhibition |
|    |             |                                                                                     | G <sub>αi</sub> 1 | IC <sub>50</sub> | 8.747e-008        | M            |
|    |             |                                                                                     |                   | Bottom           | 15.150            | % Inhibition |
|    |             |                                                                                     | GaoA              | IC <sub>50</sub> | 1.331e-005        | M            |
|    |             |                                                                                     |                   | Bottom           | 0.000             | % Inhibition |
|    |             |                                                                                     | Gα12              | IC <sub>50</sub> | 3.477e-008        | M            |
|    |             |                                                                                     |                   | Bottom           | 0.000             | % Inhibition |
|    |             |                                                                                     | β-arrestin 2      | EC <sub>50</sub> | 7.457e-006        | M            |
|    |             |                                                                                     |                   | Top              | 83.938            | % Agonism    |
| 13 | SBI-0656026 |    | Gαq               | IC <sub>50</sub> | 4.98e-005         | M            |
|    |             |                                                                                     |                   | Bottom           | 37.333            | % Inhibition |
|    |             |                                                                                     | G <sub>αi</sub> 1 | IC <sub>50</sub> | 1.35e-005         | M            |
|    |             |                                                                                     |                   | Bottom           | 33.350            | % Inhibition |
|    |             |                                                                                     | GaoA              | IC <sub>50</sub> | 0.7238 (ND)       | M            |
|    |             |                                                                                     |                   | Bottom           | 0.000             | % Inhibition |
|    |             |                                                                                     | Gα12              | IC <sub>50</sub> | 2.099e-007        | M            |
|    |             |                                                                                     |                   | Bottom           | 0.000             | % Inhibition |
|    |             |                                                                                     | β-arrestin 2      | EC <sub>50</sub> | ~ 0.06570 (ND)    | M            |
|    |             |                                                                                     |                   | Top              | 40.578            | % Agonism    |
| 14 | SBI-0656912 |  | Gαq               | IC <sub>50</sub> | 1.454e-005        | M            |
|    |             |                                                                                     |                   | Bottom           | 0.000             | % Inhibition |
|    |             |                                                                                     | G <sub>αi</sub> 1 | IC <sub>50</sub> | ~ 0.01075 (ND)    | M            |
|    |             |                                                                                     |                   | Bottom           | 0.000             | % Inhibition |
|    |             |                                                                                     | GaoA              | IC <sub>50</sub> | 3.941e-009        | M            |
|    |             |                                                                                     |                   | Bottom           | 0.000             | % Inhibition |
|    |             |                                                                                     | Gα12              | IC <sub>50</sub> | ~ 2.532e-013 (ND) | M            |
|    |             |                                                                                     |                   | Bottom           | 0.000             | % Inhibition |
|    |             |                                                                                     | β-arrestin 2      | EC <sub>50</sub> | 8.765e-005        | M            |
|    |             |                                                                                     |                   | Top              | 0.000             | % Agonism    |
| 15 | SBI-0655874 |  | Gαq               | IC <sub>50</sub> | ~ 0.01032 (ND)    | M            |
|    |             |                                                                                     |                   | Bottom           | 32.300            | % Inhibition |
|    |             |                                                                                     | G <sub>αi</sub> 1 | IC <sub>50</sub> | 5.98e-006         | M            |
|    |             |                                                                                     |                   | Bottom           | 23.463            | % Inhibition |
|    |             |                                                                                     | GaoA              | IC <sub>50</sub> | ND                | M            |
|    |             |                                                                                     |                   | Bottom           | 0.000             | % Inhibition |
|    |             |                                                                                     | Gα12              | IC <sub>50</sub> | 1.505e-007        | M            |
|    |             |                                                                                     |                   | Bottom           | 0.000             | % Inhibition |
|    |             |                                                                                     | β-arrestin 2      | EC <sub>50</sub> | 9.726e-005        | M            |
|    |             |                                                                                     |                   | Top              | 65.583            | % Agonism    |
| 16 | SBI-0657755 |  | Gαq               | IC <sub>50</sub> | 1.464e-005        | M            |
|    |             |                                                                                     |                   | Bottom           | 22.398            | % Inhibition |
|    |             |                                                                                     | G <sub>αi</sub> 1 | IC <sub>50</sub> | 2.58e-005         | M            |
|    |             |                                                                                     |                   | Bottom           | 24.291            | % Inhibition |
|    |             |                                                                                     | GaoA              | IC <sub>50</sub> | 8.321e-005        | M            |
|    |             |                                                                                     |                   | Bottom           | 0.000             | % Inhibition |
|    |             |                                                                                     | Gα12              | IC <sub>50</sub> | 0.8450 (ND)       | M            |

|    |             |                                                                                     |                     |                  |                   |              |
|----|-------------|-------------------------------------------------------------------------------------|---------------------|------------------|-------------------|--------------|
|    |             |                                                                                     |                     | Bottom           | 0.000             | % Inhibition |
|    |             |                                                                                     | $\beta$ -arrestin 2 | EC <sub>50</sub> | 1.300e-005        | M            |
|    |             |                                                                                     |                     | Top              | 95.382            | % Agonism    |
| 17 | SBI-0657962 | 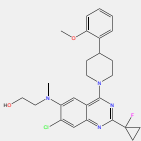   | Gaq                 | IC <sub>50</sub> | 5.558e-006        | M            |
|    |             |                                                                                     |                     | Bottom           | 37.252            | % Inhibition |
|    |             |                                                                                     | G $\alpha$ i1       | IC <sub>50</sub> | 1.28e-006         | M            |
|    |             |                                                                                     |                     | Bottom           | 20.465            | % Inhibition |
|    |             |                                                                                     | GaoA                | IC <sub>50</sub> | 1.865e-007        | M            |
|    |             |                                                                                     |                     | Bottom           | 0.000             | % Inhibition |
|    |             |                                                                                     | G $\alpha$ 12       | IC <sub>50</sub> | 6.220e-009        | M            |
|    |             |                                                                                     |                     | Bottom           | 0.000             | % Inhibition |
|    |             |                                                                                     | $\beta$ -arrestin 2 | EC <sub>50</sub> | 1.754e-005        | M            |
|    |             |                                                                                     |                     | Top              | 83.744            | % Agonism    |
| 18 | SBI-0646912 |    | Gaq                 | IC <sub>50</sub> | 6.949e-005        | M            |
|    |             |                                                                                     |                     | Bottom           | 43.057            | % Inhibition |
|    |             |                                                                                     | G $\alpha$ i1       | IC <sub>50</sub> | 1.448e-005        | M            |
|    |             |                                                                                     |                     | Bottom           | 42.900            | % Inhibition |
|    |             |                                                                                     | GaoA                | IC <sub>50</sub> | ND                | M            |
|    |             |                                                                                     |                     | Bottom           | 0.000             | % Inhibition |
|    |             |                                                                                     | G $\alpha$ 12       | IC <sub>50</sub> | 2.807e-009        | M            |
|    |             |                                                                                     |                     | Bottom           | 0.000             | % Inhibition |
|    |             |                                                                                     | $\beta$ -arrestin 2 | EC <sub>50</sub> | ~ 4.830e-014 (ND) | M            |
|    |             |                                                                                     |                     | Top              | 59.258            | % Agonism    |
| 19 | SBI-0656149 |   | Gaq                 | IC <sub>50</sub> | 3.665e-014        | M            |
|    |             |                                                                                     |                     | Bottom           | 0.000             | % Inhibition |
|    |             |                                                                                     | G $\alpha$ i1       | IC <sub>50</sub> | 4.89e-004         | M            |
|    |             |                                                                                     |                     | Bottom           | 11.762            | % Inhibition |
|    |             |                                                                                     | GaoA                | IC <sub>50</sub> | 2.752e-008        | M            |
|    |             |                                                                                     |                     | Bottom           | 0.000             | % Inhibition |
|    |             |                                                                                     | G $\alpha$ 12       | IC <sub>50</sub> | ND                | M            |
|    |             |                                                                                     |                     | Bottom           | 0.000             | % Inhibition |
|    |             |                                                                                     | $\beta$ -arrestin 2 | EC <sub>50</sub> | ~ 0.05446 (ND)    | M            |
|    |             |                                                                                     |                     | Top              | 0.000             | % Agonism    |
| 20 | SBI-0656571 |  | Gaq                 | IC <sub>50</sub> | 6.489e-006        | M            |
|    |             |                                                                                     |                     | Bottom           | 92.464            | % Inhibition |
|    |             |                                                                                     | G $\alpha$ i1       | IC <sub>50</sub> | 2.57e-006         | M            |
|    |             |                                                                                     |                     | Bottom           | 74.566            | % Inhibition |
|    |             |                                                                                     | GaoA                | IC <sub>50</sub> | ~ 0.01347 (ND)    | M            |
|    |             |                                                                                     |                     | Bottom           | 0.000             | % Inhibition |
|    |             |                                                                                     | G $\alpha$ 12       | IC <sub>50</sub> | ND                | M            |
|    |             |                                                                                     |                     | Bottom           | 0.000             | % Inhibition |
|    |             |                                                                                     | $\beta$ -arrestin 2 | EC <sub>50</sub> | 9.598e-006        | M            |
|    |             |                                                                                     |                     | Top              | 89.642            | % Agonism    |
| 21 | SBI-0657754 |  | Gaq                 | IC <sub>50</sub> | 1.865e-006        | M            |
|    |             |                                                                                     |                     | Bottom           | 99.355            | % Inhibition |
|    |             |                                                                                     | G $\alpha$ i1       | IC <sub>50</sub> | 7.65e-007         | M            |
|    |             |                                                                                     |                     | Bottom           | 45.646            | % Inhibition |
|    |             |                                                                                     | GaoA                | IC <sub>50</sub> | 1.046e-007        | M            |
|    |             |                                                                                     |                     | Bottom           | 0.000             | % Inhibition |
|    |             |                                                                                     | G $\alpha$ 12       | IC <sub>50</sub> | ND                | M            |
|    |             |                                                                                     |                     | Bottom           | 0.000             | % Inhibition |
|    |             |                                                                                     | $\beta$ -arrestin 2 | EC <sub>50</sub> | 3.643e-006        | M            |
|    |             |                                                                                     |                     | Top              | 93.819            | % Agonism    |
| 22 | SBI-0657750 |                                                                                     | Gaq                 | IC <sub>50</sub> | 1.908e-006        | M            |

|    |             |                                                                                     |                  |                  |                |              |
|----|-------------|-------------------------------------------------------------------------------------|------------------|------------------|----------------|--------------|
|    |             | 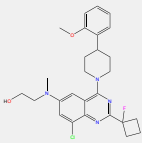   | G <sub>αi1</sub> | Bottom           | 107.544        | % Inhibition |
|    |             |                                                                                     |                  | IC <sub>50</sub> | 3.963e-007     | M            |
|    |             |                                                                                     | GαoA             | Bottom           | 33.778         | % Inhibition |
|    |             |                                                                                     |                  | IC <sub>50</sub> | ND             | M            |
|    |             |                                                                                     | Gα12             | Bottom           | 0.000          | % Inhibition |
|    |             |                                                                                     |                  | IC <sub>50</sub> | 6.747e-007     | M            |
|    |             |                                                                                     | β-arrestin 2     | Bottom           | 0.000          | % Inhibition |
|    |             |                                                                                     |                  | EC <sub>50</sub> | 3.465e-006     | M            |
|    |             |                                                                                     |                  | Top              | 121.572        | % Agonism    |
| 23 | MLS-0463341 |    | Gαq              | IC <sub>50</sub> | ~ 0.03469 (ND) | M            |
|    |             |                                                                                     |                  | Bottom           | 0.000          | % Inhibition |
|    |             |                                                                                     | G <sub>αi1</sub> | IC <sub>50</sub> | 7.906e-005     | M            |
|    |             |                                                                                     |                  | Bottom           | 10.907         | % Inhibition |
|    |             |                                                                                     | GαoA             | IC <sub>50</sub> | 2.182e-007     | M            |
|    |             |                                                                                     |                  | Bottom           | 0.000          | % Inhibition |
|    |             |                                                                                     | Gα12             | IC <sub>50</sub> | 1.042e-005     | M            |
|    |             |                                                                                     |                  | Bottom           | 0.000          | % Inhibition |
|    |             |                                                                                     | β-arrestin 2     | EC <sub>50</sub> | 0.0001577      | M            |
|    |             |                                                                                     |                  | Top              | 47.155         | % Agonism    |
| 24 | MLS-0469654 |    | Gαq              | IC <sub>50</sub> | ND             | M            |
|    |             |                                                                                     |                  | Bottom           | 0.000          | % Inhibition |
|    |             |                                                                                     | G <sub>αi1</sub> | IC <sub>50</sub> | ND             | M            |
|    |             |                                                                                     |                  | Bottom           | 5.044          | % Inhibition |
|    |             |                                                                                     | GαoA             | IC <sub>50</sub> | 1.884e-007     | M            |
|    |             |                                                                                     |                  | Bottom           | 0.000          | % Inhibition |
|    |             |                                                                                     | Gα12             | IC <sub>50</sub> | 1.677e-005     | M            |
|    |             |                                                                                     |                  | Bottom           | 0.000          | % Inhibition |
|    |             |                                                                                     | β-arrestin 2     | EC <sub>50</sub> | ~ 0.06534 (ND) | M            |
|    |             |                                                                                     |                  | Top              | 22.681         | % Agonism    |
| 25 | SBI-0646238 |  | Gαq              | IC <sub>50</sub> | ND             | M            |
|    |             |                                                                                     |                  | Bottom           | 0.000          | % Inhibition |
|    |             |                                                                                     | G <sub>αi1</sub> | IC <sub>50</sub> | 1.58e-005      | M            |
|    |             |                                                                                     |                  | Bottom           | 6.175          | % Inhibition |
|    |             |                                                                                     | GαoA             | IC <sub>50</sub> | 1.909e-007     | M            |
|    |             |                                                                                     |                  | Bottom           | 0.000          | % Inhibition |
|    |             |                                                                                     | Gα12             | IC <sub>50</sub> | 3.923e-006     | M            |
|    |             |                                                                                     |                  | Bottom           | 0.000          | % Inhibition |
|    |             |                                                                                     | β-arrestin 2     | EC <sub>50</sub> | ~ 0.2146 (ND)  | M            |
|    |             |                                                                                     |                  | Top              | 29.945         | % Agonism    |
| 26 | SBI-0646593 |  | Gαq              | IC <sub>50</sub> | 3.905e-006     | M            |
|    |             |                                                                                     |                  | Bottom           | 32.449         | % Inhibition |
|    |             |                                                                                     | G <sub>αi1</sub> | IC <sub>50</sub> | 1.05e-006      | M            |
|    |             |                                                                                     |                  | Bottom           | 23.793         | % Inhibition |
|    |             |                                                                                     | GαoA             | IC <sub>50</sub> | 4.370e-006     | M            |
|    |             |                                                                                     |                  | Bottom           | 0.000          | % Inhibition |
|    |             |                                                                                     | Gα12             | IC <sub>50</sub> | 1.634e-007     | M            |
|    |             |                                                                                     |                  | Bottom           | 0.000          | % Inhibition |
|    |             |                                                                                     | β-arrestin 2     | EC <sub>50</sub> | 4.750e-006     | M            |
|    |             |                                                                                     |                  | Top              | 75.422         | % Agonism    |
| 27 | SBI-0646782 |                                                                                     | Gαq              | IC <sub>50</sub> | ND             | M            |
|    |             |                                                                                     |                  | Bottom           | 0.000          | % Inhibition |
|    |             |                                                                                     | G <sub>αi1</sub> | IC <sub>50</sub> | 2.03e-006      | M            |
|    |             |                                                                                     |                  | Bottom           | 1.059          | % Inhibition |
|    |             |                                                                                     | GαoA             | IC <sub>50</sub> | 5.025e-008     | M            |

|                  |             |                                                                                   |                   |                  |                |              |
|------------------|-------------|-----------------------------------------------------------------------------------|-------------------|------------------|----------------|--------------|
|                  |             | 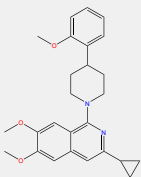 | Gα12              | Bottom           | 0.000          | % Inhibition |
|                  |             |                                                                                   | β-arrestin 2      | IC <sub>50</sub> | 7.059e-007     | M            |
|                  |             |                                                                                   |                   | Bottom           | 0.000          | % Inhibition |
|                  |             |                                                                                   |                   |                  |                |              |
| Top              | 9.918       | % Agonism                                                                         |                   |                  |                |              |
| 28               | SBI-0647342 |  | Gαq               | IC <sub>50</sub> | 6.659e-006     | M            |
|                  |             |                                                                                   | G <sub>αi</sub> 1 | Bottom           | 60.927         | % Inhibition |
|                  |             |                                                                                   |                   | IC <sub>50</sub> | 1.48e-006      | M            |
|                  |             |                                                                                   | GαoA              | Bottom           | 33.716         | % Inhibition |
|                  |             |                                                                                   |                   | IC <sub>50</sub> | 5.841e-006     | M            |
|                  |             |                                                                                   | Gα12              | Bottom           | 41.906         | % Inhibition |
|                  |             |                                                                                   |                   | IC <sub>50</sub> | 1.036e-005     | M            |
|                  |             |                                                                                   | β-arrestin 2      | Bottom           | 0.000          | % Inhibition |
| EC <sub>50</sub> | 7.563e-006  | M                                                                                 |                   |                  |                |              |
| Top              | 94.130      | % Agonism                                                                         |                   |                  |                |              |
| 29               | SBI-0646503 |  | Gαq               | IC <sub>50</sub> | 1.021e-005     | M            |
|                  |             |                                                                                   | G <sub>αi</sub> 1 | Bottom           | 58.928         | % Inhibition |
|                  |             |                                                                                   |                   | IC <sub>50</sub> | 5.58e-006      | M            |
|                  |             |                                                                                   | GαoA              | Bottom           | 55.933         | % Inhibition |
|                  |             |                                                                                   |                   | IC <sub>50</sub> | ~ 0.03047 (ND) | M            |
|                  |             |                                                                                   | Gα12              | Bottom           | 24.532         | % Inhibition |
|                  |             |                                                                                   |                   | IC <sub>50</sub> | ND             | M            |
|                  |             |                                                                                   | β-arrestin 2      | Bottom           | 0.000          | % Inhibition |
| EC <sub>50</sub> | 1.298e-005  | M                                                                                 |                   |                  |                |              |
| Top              | 70.781      | % Agonism                                                                         |                   |                  |                |              |

CI, confidence interval; EC<sub>50</sub>, half-maximal effective concentration; IC<sub>50</sub>, half-maximal inhibitory concentration; ND, not defined
